# Supplementary material for: Rotational spectroscopy of the isotopic species of silicon monosulfide, SiS
Source: Royal Society of Chemistry journal article supplement (doi:10.1039/b618799d), 2007-01-01
Supplement: b618799d.pdf [file b618799d.pdf]

Final SiS data set. The first column gives the line number; the next eight represent the upper and lower state quantum numbers which are separated by a minus sign; column 10, 11 and 12 contain the experimental frequencies, the uncertainties and the residuals (observed frequency minus frequency calculated from the final set of spectroscopic parameters). Column 13 contains the weighting for the few overlapping lines ( $< 1$ ) or the reference if the measurement is from a previous investigation.

The units are

- MHz, kHz, kHz for the pure rotational data  
 -  $\text{cm}^{-1}$ ,  $10^{-3} \text{cm}^{-1}$ ,  $10^{-3} \text{cm}^{-1}$  for the rovibrational data  
 (the minus sign for the uncertainties signals that the units are reciprocal centimetres)

The quantum numbers are J, v, F<sub>1</sub>, F;

J = F<sub>1</sub> = F for isotopic species not involving (29)Si or (33)S and F<sub>1</sub> and F are redundant;

F<sub>1</sub> = F for isotopic species containing either (29)Si or (33)S and F is redundant and both F<sub>1</sub> and F are rounded up to the next integer;

F<sub>1</sub> is rounded up to the next integer isotopic species containing (29)Si and (33)S, F<sub>1</sub> = J + I(33S), F = F<sub>1</sub> + I(29Si)

Isotopic species with and without resolved hyperfine structure (hfs) were given different state numbers for keeping the line list short.

v is a state number that designates vibrational states AND isotopic species; the actual meaning depends on the definition of the parameters in the parameter file.

|           |                           |                |
|-----------|---------------------------|----------------|
| 0 - 51    | refer to (28)Si(32)S, v = | 0 - 51         |
| 60 - 91   | refer to (29)Si(32)S, v = | 0 - 31         |
| 260 - 260 | refer to (29)Si(32)S, v = | 0 - 0 (no hfs) |
| 100 - 133 | refer to (30)Si(32)S, v = | 0 - 33         |
| 140 - 156 | refer to (28)Si(33)S, v = | 0 - 16         |
| 261 - 261 | refer to (28)Si(33)S, v = | 0 - 0 (no hfs) |
| 160 - 163 | refer to (29)Si(33)S, v = | 0 - 3          |
| 165 - 167 | refer to (30)Si(33)S, v = | 0 - 2          |
| 170 - 201 | refer to (28)Si(34)S, v = | 0 - 31         |
| 210 - 220 | refer to (29)Si(34)S, v = | 0 - 10         |
| 225 - 236 | refer to (30)Si(34)S, v = | 0 - 11         |
| 240 - 244 | refer to (28)Si(36)S, v = | 0 - 4          |
| 250 - 250 | refer to (29)Si(36)S, v = | 0 - 0          |
| 255 - 256 | refer to (30)Si(36)S, v = | 0 - 1          |

(28)Si(32)S

|     |    |   |    |    |   |    |   |    |    |            |     |        |    |
|-----|----|---|----|----|---|----|---|----|----|------------|-----|--------|----|
| 1:  | 1  | 0 | 1  | 1  | - | 0  | 0 | 0  | 0  | 18154.888  | 2.  | 2.01   | 22 |
| 2:  | 2  | 0 | 2  | 2  | - | 1  | 0 | 1  | 1  | 36309.627  | 2.  | -1.71  | 22 |
| 3:  | 3  | 0 | 3  | 3  | - | 2  | 0 | 2  | 2  | 54464.081  | 4.  | -3.86  | 17 |
| 4:  | 7  | 0 | 7  | 7  | - | 6  | 0 | 6  | 6  | 127076.186 | 10. | 7.80   |    |
| 5:  | 8  | 0 | 8  | 8  | - | 7  | 0 | 7  | 7  | 145227.053 | 10. | 0.69   |    |
| 6:  | 9  | 0 | 9  | 9  | - | 8  | 0 | 8  | 8  | 163376.785 | 10. | 4.83   |    |
| 7:  | 11 | 0 | 11 | 11 | - | 10 | 0 | 10 | 10 | 199672.229 | 10. | 5.00   |    |
| 8:  | 12 | 0 | 12 | 12 | - | 11 | 0 | 11 | 11 | 217817.663 | 10. | 9.60   |    |
| 9:  | 16 | 0 | 16 | 16 | - | 15 | 0 | 15 | 15 | 290380.757 | 10. | 12.70  |    |
| 10: | 18 | 0 | 18 | 18 | - | 17 | 0 | 17 | 17 | 326649.109 | 10. | 1.24   |    |
| 11: | 19 | 0 | 19 | 19 | - | 18 | 0 | 18 | 18 | 344779.481 | 10. | -11.48 |    |
| 12: | 20 | 0 | 20 | 20 | - | 19 | 0 | 19 | 19 | 362907.164 | 10. | 9.17   |    |
| 13: | 21 | 0 | 21 | 21 | - | 20 | 0 | 20 | 20 | 381031.954 | 10. | 2.50   |    |
| 14: | 22 | 0 | 22 | 22 | - | 21 | 0 | 21 | 21 | 399153.731 | 10. | -8.22  |    |
| 15: | 23 | 0 | 23 | 23 | - | 22 | 0 | 22 | 22 | 417272.368 | 10. | -6.70  |    |
| 16: | 24 | 0 | 24 | 24 | - | 23 | 0 | 23 | 23 | 435387.701 | 10. | -13.64 |    |
| 17: | 25 | 0 | 25 | 25 | - | 24 | 0 | 24 | 24 | 453499.631 | 20. | 15.25  |    |
| 18: | 26 | 0 | 26 | 26 | - | 25 | 0 | 25 | 25 | 471607.935 | 10. | 0.25   |    |
| 19: | 27 | 0 | 27 | 27 | - | 26 | 0 | 26 | 26 | 489712.524 | 10. | -4.35  |    |

|     |    |    |    |    |   |    |    |    |    |            |     |        |    |
|-----|----|----|----|----|---|----|----|----|----|------------|-----|--------|----|
| 20: | 28 | 0  | 28 | 28 | - | 27 | 0  | 27 | 27 | 507813.258 | 10. | 4.75   |    |
| 21: | 29 | 0  | 29 | 29 | - | 28 | 0  | 28 | 28 | 525909.965 | 5.  | -1.15  |    |
| 22: | 30 | 0  | 30 | 30 | - | 29 | 0  | 29 | 29 | 544002.518 | 5.  | -5.77  |    |
| 23: | 31 | 0  | 31 | 31 | - | 30 | 0  | 30 | 30 | 562090.777 | 5.  | -5.81  |    |
| 24: | 32 | 0  | 32 | 32 | - | 31 | 0  | 31 | 31 | 580174.604 | 10. | 4.03   |    |
| 25: | 33 | 0  | 33 | 33 | - | 32 | 0  | 32 | 32 | 598253.828 | 5.  | -3.97  |    |
| 26: | 34 | 0  | 34 | 34 | - | 33 | 0  | 33 | 33 | 616328.337 | 10. | 1.51   |    |
| 27: | 36 | 0  | 36 | 36 | - | 35 | 0  | 35 | 35 | 652462.584 | 10. | 0.07   |    |
| 28: | 37 | 0  | 37 | 37 | - | 36 | 0  | 36 | 36 | 670522.052 | 10. | 9.76   |    |
| 29: | 38 | 0  | 38 | 38 | - | 37 | 0  | 37 | 37 | 688576.198 | 10. | -0.89  |    |
| 30: | 39 | 0  | 39 | 39 | - | 38 | 0  | 38 | 38 | 706624.908 | 10. | -2.56  |    |
| 31: | 40 | 0  | 40 | 40 | - | 39 | 0  | 39 | 39 | 724668.036 | 10. | 2.04   |    |
| 32: | 41 | 0  | 41 | 41 | - | 40 | 0  | 40 | 40 | 742705.423 | 10. | -2.77  |    |
| 33: | 45 | 0  | 45 | 45 | - | 44 | 0  | 44 | 44 | 814794.795 | 20. | -16.03 |    |
| 34: | 46 | 0  | 46 | 46 | - | 45 | 0  | 45 | 45 | 832801.405 | 25. | 9.69   |    |
| 35: | 47 | 0  | 47 | 47 | - | 46 | 0  | 46 | 46 | 850801.384 | 5.  | -4.14  |    |
| 36: | 48 | 0  | 48 | 48 | - | 47 | 0  | 47 | 47 | 868794.650 | 5.  | 3.79   |    |
| 37: | 49 | 0  | 49 | 49 | - | 48 | 0  | 48 | 48 | 886781.041 | 10. | 14.79  |    |
| 38: | 50 | 0  | 50 | 50 | - | 49 | 0  | 49 | 49 | 904760.377 | 10. | -7.82  |    |
| 39: | 51 | 0  | 51 | 51 | - | 50 | 0  | 50 | 50 | 922732.579 | 5.  | 0.28   |    |
| 40: | 1  | 1  | 1  | 1  | - | 0  | 1  | 0  | 0  | 18066.552  | 2.  | 0.27   | 22 |
| 41: | 2  | 1  | 2  | 2  | - | 1  | 1  | 1  | 1  | 36132.959  | 2.  | -1.04  | 22 |
| 42: | 3  | 1  | 3  | 3  | - | 2  | 1  | 2  | 2  | 54199.084  | 7.  | 2.49   | 17 |
| 43: | 47 | 1  | 47 | 47 | - | 46 | 1  | 46 | 46 | 846647.209 | 50. | -60.44 |    |
| 44: | 48 | 1  | 48 | 48 | - | 47 | 1  | 47 | 47 | 864552.040 | 20. | 5.02   |    |
| 45: | 49 | 1  | 49 | 49 | - | 48 | 1  | 48 | 48 | 882449.940 | 30. | 24.42  |    |
| 46: | 50 | 1  | 50 | 50 | - | 49 | 1  | 49 | 49 | 900340.716 | 50. | -51.78 |    |
| 47: | 51 | 1  | 51 | 51 | - | 50 | 1  | 50 | 50 | 918224.408 | 50. | -40.10 |    |
| 48: | 1  | 2  | 1  | 1  | - | 0  | 2  | 0  | 0  | 17978.209  | 2.  | -0.27  | 22 |
| 49: | 2  | 2  | 2  | 2  | - | 1  | 2  | 1  | 1  | 35956.274  | 2.  | -0.99  | 22 |
| 50: | 3  | 2  | 3  | 3  | - | 2  | 2  | 2  | 2  | 53934.052  | 9.  | -1.58  | 17 |
| 51: | 1  | 3  | 1  | 1  | - | 0  | 3  | 0  | 0  | 17889.855  | 2.  | -0.70  | 22 |
| 52: | 2  | 3  | 2  | 2  | - | 1  | 3  | 1  | 1  | 35779.567  | 2.  | -0.68  | 22 |
| 53: | 3  | 3  | 3  | 3  | - | 2  | 3  | 2  | 2  | 53668.993  | 9.  | 0.75   | 17 |
| 54: | 1  | 4  | 1  | 1  | - | 0  | 4  | 0  | 0  | 17801.488  | 2.  | 0.05   | 22 |
| 55: | 2  | 4  | 2  | 2  | - | 1  | 4  | 1  | 1  | 35602.830  | 2.  | -2.03  | 22 |
| 56: | 3  | 4  | 3  | 3  | - | 2  | 4  | 2  | 2  | 53403.889  | 30. | 0.62   | 17 |
| 57: | 1  | 5  | 1  | 1  | - | 0  | 5  | 0  | 0  | 17713.104  | 2.  | 1.13   | 22 |
| 58: | 2  | 5  | 2  | 2  | - | 1  | 5  | 1  | 1  | 35426.061  | 2.  | -0.71  | 22 |
| 59: | 1  | 6  | 1  | 1  | - | 0  | 6  | 0  | 0  | 17624.699  | 2.  | 1.80   | 22 |
| 60: | 2  | 6  | 2  | 2  | - | 1  | 6  | 1  | 1  | 35249.252  | 2.  | 1.78   | 22 |
| 61: | 1  | 7  | 1  | 1  | - | 0  | 7  | 0  | 0  | 17536.269  | 2.  | 1.37   | 22 |
| 62: | 2  | 7  | 2  | 2  | - | 1  | 7  | 1  | 1  | 35072.393  | 2.  | 2.10   | 22 |
| 63: | 1  | 8  | 1  | 1  | - | 0  | 8  | 0  | 0  | 17447.813  | 2.  | 2.29   | 22 |
| 64: | 2  | 8  | 2  | 2  | - | 1  | 8  | 1  | 1  | 34895.479  | 2.  | 2.11   | 22 |
| 65: | 1  | 9  | 1  | 1  | - | 0  | 9  | 0  | 0  | 17359.325  | 2.  | 2.03   | 22 |
| 66: | 2  | 9  | 2  | 2  | - | 1  | 9  | 1  | 1  | 34718.504  | 2.  | 2.78   | 22 |
| 67: | 1  | 10 | 1  | 1  | - | 0  | 10 | 0  | 0  | 17270.802  | 2.  | 1.17   | 22 |
| 68: | 2  | 10 | 2  | 2  | - | 1  | 10 | 1  | 1  | 34541.459  | 2.  | 2.25   | 22 |
| 69: | 1  | 11 | 1  | 1  | - | 0  | 11 | 0  | 0  | 17182.240  | 2.  | -0.67  | 22 |
| 70: | 2  | 11 | 2  | 2  | - | 1  | 11 | 1  | 1  | 34364.336  | 2.  | -0.24  | 22 |
| 71: | 1  | 12 | 1  | 1  | - | 0  | 12 | 0  | 0  | 17093.638  | 2.  | -0.80  | 22 |
| 72: | 2  | 12 | 2  | 2  | - | 1  | 12 | 1  | 1  | 34187.133  | 2.  | 0.69   | 22 |
| 73: | 1  | 13 | 1  | 1  | - | 0  | 13 | 0  | 0  | 17004.991  | 2.  | -0.49  | 22 |
| 74: | 2  | 13 | 2  | 2  | - | 1  | 13 | 1  | 1  | 34009.836  | 2.  | -1.49  | 22 |
| 75: | 1  | 14 | 1  | 1  | - | 0  | 14 | 0  | 0  | 16916.295  | 2.  | 0.05   | 22 |
| 76: | 2  | 14 | 2  | 2  | - | 1  | 14 | 1  | 1  | 33832.443  | 2.  | -1.19  | 22 |
| 77: | 1  | 15 | 1  | 1  | - | 0  | 15 | 0  | 0  | 16827.544  | 2.  | -1.33  | 22 |
| 78: | 2  | 15 | 2  | 2  | - | 1  | 15 | 1  | 1  | 33654.945  | 2.  | 0.26   | 22 |
| 79: | 1  | 16 | 1  | 1  | - | 0  | 16 | 0  | 0  | 16738.737  | 2.  | -1.75  | 22 |
| 80: | 2  | 16 | 2  | 2  | - | 1  | 16 | 1  | 1  | 33477.330  | 2.  | -1.36  | 22 |
| 81: | 1  | 17 | 1  | 1  | - | 0  | 17 | 0  | 0  | 16649.871  | 2.  | -0.27  | 22 |
| 82: | 2  | 17 | 2  | 2  | - | 1  | 17 | 1  | 1  | 33299.592  | 2.  | -4.19  | 22 |
| 83: | 1  | 18 | 1  | 1  | - | 0  | 18 | 0  | 0  | 16560.939  | 2.  | 0.06   | 22 |
| 84: | 2  | 18 | 2  | 2  | - | 1  | 18 | 1  | 1  | 33121.731  | 2.  | -0.29  | 22 |
| 85: | 1  | 19 | 1  | 1  | - | 0  | 19 | 0  | 0  | 16471.937  | 2.  | -0.72  | 22 |
| 86: | 2  | 19 | 2  | 2  | - | 1  | 19 | 1  | 1  | 32943.727  | 2.  | -1.63  | 22 |
| 87: | 1  | 20 | 1  | 1  | - | 0  | 20 | 0  | 0  | 16382.863  | 2.  | -0.57  | 22 |
| 88: | 2  | 20 | 2  | 2  | - | 1  | 20 | 1  | 1  | 32765.577  | 2.  | -3.07  | 22 |
| 89: | 1  | 21 | 1  | 1  | - | 0  | 21 | 0  | 0  | 16293.713  | 2.  | 0.64   | 22 |
| 90: | 2  | 21 | 2  | 2  | - | 1  | 21 | 1  | 1  | 32587.277  | 2.  | -0.42  | 22 |

|      |   |    |   |   |   |   |    |   |   |           |    |       |    |
|------|---|----|---|---|---|---|----|---|---|-----------|----|-------|----|
| 91:  | 1 | 22 | 1 | 1 | - | 0 | 22 | 0 | 0 | 16204.480 | 2. | 0.04  | 22 |
| 92:  | 2 | 22 | 2 | 2 | - | 1 | 22 | 1 | 1 | 32408.812 | 2. | -0.37 | 22 |
| 93:  | 1 | 23 | 1 | 1 | - | 0 | 23 | 0 | 0 | 16115.162 | 2. | -0.17 | 22 |
| 94:  | 2 | 23 | 2 | 2 | - | 1 | 23 | 1 | 1 | 32230.176 | 2. | -0.52 | 22 |
| 95:  | 1 | 24 | 1 | 1 | - | 0 | 24 | 0 | 0 | 16025.755 | 2. | 0.28  | 22 |
| 96:  | 2 | 24 | 2 | 2 | - | 1 | 24 | 1 | 1 | 32051.363 | 2. | 1.63  | 22 |
| 97:  | 1 | 25 | 1 | 1 | - | 0 | 25 | 0 | 0 | 15936.254 | 2. | 0.67  | 22 |
| 98:  | 2 | 25 | 2 | 2 | - | 1 | 25 | 1 | 1 | 31872.358 | 2. | -0.32 | 22 |
| 99:  | 1 | 26 | 1 | 1 | - | 0 | 26 | 0 | 0 | 15846.654 | 2. | 0.38  | 22 |
| 100: | 2 | 26 | 2 | 2 | - | 1 | 26 | 1 | 1 | 31693.160 | 2. | 1.38  | 22 |
| 101: | 1 | 27 | 1 | 1 | - | 0 | 27 | 0 | 0 | 15756.952 | 2. | 0.84  | 22 |
| 102: | 2 | 27 | 2 | 2 | - | 1 | 27 | 1 | 1 | 31513.755 | 2. | 1.57  | 22 |
| 103: | 1 | 28 | 1 | 1 | - | 0 | 28 | 0 | 0 | 15667.143 | 2. | 1.53  | 22 |
| 104: | 2 | 28 | 2 | 2 | - | 1 | 28 | 1 | 1 | 31334.137 | 2. | 3.25  | 22 |
| 105: | 1 | 29 | 1 | 1 | - | 0 | 29 | 0 | 0 | 15577.221 | 2. | 1.05  | 22 |
| 106: | 2 | 29 | 2 | 2 | - | 1 | 29 | 1 | 1 | 31154.292 | 2. | 1.57  | 22 |
| 107: | 1 | 30 | 1 | 1 | - | 0 | 30 | 0 | 0 | 15487.184 | 2. | 2.04  | 22 |
| 108: | 2 | 30 | 2 | 2 | - | 1 | 30 | 1 | 1 | 30974.218 | 2. | 3.84  | 22 |
| 109: | 1 | 31 | 1 | 1 | - | 0 | 31 | 0 | 0 | 15397.024 | 2. | 1.25  | 22 |
| 110: | 2 | 31 | 2 | 2 | - | 1 | 31 | 1 | 1 | 30793.898 | 2. | 2.56  | 22 |
| 111: | 1 | 32 | 1 | 1 | - | 0 | 32 | 0 | 0 | 15306.739 | 2. | 1.52  | 22 |
| 112: | 1 | 33 | 1 | 1 | - | 0 | 33 | 0 | 0 | 15216.322 | 2. | 0.82  | 22 |
| 113: | 2 | 33 | 2 | 2 | - | 1 | 33 | 1 | 1 | 30432.491 | 2. | -0.67 | 22 |
| 114: | 1 | 34 | 1 | 1 | - | 0 | 34 | 0 | 0 | 15125.770 | 2. | 1.22  | 22 |
| 115: | 2 | 34 | 2 | 2 | - | 1 | 34 | 1 | 1 | 30251.386 | 2. | -0.57 | 22 |
| 116: | 1 | 35 | 1 | 1 | - | 0 | 35 | 0 | 0 | 15035.075 | 2. | -0.09 | 22 |
| 117: | 2 | 35 | 2 | 2 | - | 1 | 35 | 1 | 1 | 30069.997 | 2. | -1.87 | 22 |
| 118: | 1 | 36 | 1 | 1 | - | 0 | 36 | 0 | 0 | 14944.234 | 2. | -0.77 | 22 |
| 119: | 2 | 36 | 2 | 2 | - | 1 | 36 | 1 | 1 | 29888.316 | 2. | -1.89 | 22 |
| 120: | 1 | 37 | 1 | 1 | - | 0 | 37 | 0 | 0 | 14853.241 | 2. | -1.31 | 22 |
| 121: | 2 | 37 | 2 | 2 | - | 1 | 37 | 1 | 1 | 29706.328 | 2. | -4.65 | 22 |
| 122: | 1 | 38 | 1 | 1 | - | 0 | 38 | 0 | 0 | 14762.091 | 2. | -1.07 | 22 |
| 123: | 2 | 38 | 2 | 2 | - | 1 | 38 | 1 | 1 | 29524.027 | 2. | -4.84 | 22 |
| 124: | 1 | 39 | 1 | 1 | - | 0 | 39 | 0 | 0 | 14670.776 | 2. | -2.21 | 22 |
| 125: | 2 | 39 | 2 | 2 | - | 1 | 39 | 1 | 1 | 29341.399 | 2. | -4.78 | 22 |
| 126: | 1 | 40 | 1 | 1 | - | 0 | 40 | 0 | 0 | 14579.293 | 2. | -1.71 | 22 |
| 127: | 2 | 40 | 2 | 2 | - | 1 | 40 | 1 | 1 | 29158.431 | 2. | -5.42 | 22 |
| 128: | 1 | 41 | 1 | 1 | - | 0 | 41 | 0 | 0 | 14487.634 | 2. | -1.32 | 22 |
| 129: | 2 | 41 | 2 | 2 | - | 1 | 41 | 1 | 1 | 28975.111 | 2. | -6.29 | 22 |
| 130: | 1 | 42 | 1 | 1 | - | 0 | 42 | 0 | 0 | 14395.795 | 2. | 1.40  | 22 |
| 131: | 2 | 42 | 2 | 2 | - | 1 | 42 | 1 | 1 | 28791.430 | 2. | -3.48 | 22 |
| 132: | 1 | 43 | 1 | 1 | - | 0 | 43 | 0 | 0 | 14303.763 | 2. | 0.15  | 22 |
| 133: | 2 | 43 | 2 | 2 | - | 1 | 43 | 1 | 1 | 28607.369 | 2. | -2.61 | 22 |
| 134: | 1 | 44 | 1 | 1 | - | 0 | 44 | 0 | 0 | 14211.536 | 2. | -0.11 | 22 |
| 135: | 2 | 44 | 2 | 2 | - | 1 | 44 | 1 | 1 | 28422.917 | 2. | -0.76 | 22 |
| 136: | 1 | 45 | 1 | 1 | - | 0 | 45 | 0 | 0 | 14119.109 | 2. | 2.84  |    |
| 137: | 2 | 45 | 2 | 2 | - | 1 | 45 | 1 | 1 | 28238.060 | 2. | 2.51  | 22 |
| 138: | 1 | 46 | 1 | 1 | - | 0 | 46 | 0 | 0 | 14026.468 | 2. | 2.52  |    |
| 139: | 2 | 46 | 2 | 2 | - | 1 | 46 | 1 | 1 | 28052.779 | 2. | 3.25  | 22 |
| 140: | 1 | 47 | 1 | 1 | - | 0 | 47 | 0 | 0 | 13933.610 | 2. | 3.77  |    |
| 141: | 2 | 47 | 2 | 2 | - | 1 | 47 | 1 | 1 | 27867.061 | 2. | 4.12  | 22 |
| 142: | 1 | 48 | 1 | 1 | - | 0 | 48 | 0 | 0 | 13840.526 | 2. | 5.73  |    |
| 143: | 2 | 48 | 2 | 2 | - | 1 | 48 | 1 | 1 | 27680.892 | 2. | 7.45  | 22 |
| 144: | 1 | 49 | 1 | 1 | - | 0 | 49 | 0 | 0 | 13747.203 | 2. | 3.95  |    |
| 145: | 2 | 49 | 2 | 2 | - | 1 | 49 | 1 | 1 | 27494.245 | 2. | 3.28  | 22 |
| 146: | 1 | 50 | 1 | 1 | - | 0 | 50 | 0 | 0 | 13653.634 | 2. | 0.31  |    |
| 147: | 2 | 50 | 2 | 2 | - | 1 | 50 | 1 | 1 | 27307.110 | 2. | -0.60 | 22 |
| 148: | 1 | 51 | 1 | 1 | - | 0 | 51 | 0 | 0 | 13559.811 | 2. | -3.89 |    |
| 149: | 2 | 51 | 2 | 2 | - | 1 | 51 | 1 | 1 | 27119.463 | 2. | -9.60 | 22 |

(29)Si(32)S

|      |    |     |    |    |   |    |     |    |    |            |     |       |    |
|------|----|-----|----|----|---|----|-----|----|----|------------|-----|-------|----|
| 150: | 1  | 60  | 2  | 2  | - | 0  | 60  | 1  | 1  | 17821.296  | 2.  | 1.23  | 22 |
| 151: | 1  | 60  | 1  | 1  | - | 0  | 60  | 1  | 1  | 17821.315  | 2.  | -1.47 | 22 |
| 152: | 2  | 60  | 3  | 3  | - | 1  | 60  | 2  | 2  | 35642.457  | 2.  | -1.71 | 22 |
| 153: | 2  | 60  | 2  | 2  | - | 1  | 60  | 1  | 1  | 35642.475  | 2.  | 1.82  | 22 |
| 154: | 3  | 260 | 3  | 3  | - | 2  | 260 | 2  | 2  | 53463.348  | 8.  | -5.78 | 17 |
| 155: | 19 | 260 | 19 | 19 | - | 18 | 260 | 18 | 18 | 338447.360 | 10. | 7.88  |    |
| 156: | 20 | 260 | 20 | 20 | - | 19 | 260 | 19 | 19 | 356242.429 | 10. | 5.94  |    |
| 157: | 21 | 260 | 21 | 21 | - | 20 | 260 | 20 | 20 | 374034.726 | 10. | -6.82 |    |
| 158: | 22 | 260 | 22 | 22 | - | 21 | 260 | 21 | 21 | 391824.150 | 10. | 6.67  |    |
| 159: | 23 | 260 | 23 | 23 | - | 22 | 260 | 22 | 22 | 409610.522 | 10. | 5.48  |    |

|      |    |     |    |    |   |    |     |    |    |            |     |       |    |
|------|----|-----|----|----|---|----|-----|----|----|------------|-----|-------|----|
| 160: | 24 | 260 | 24 | 24 | - | 23 | 260 | 23 | 23 | 427393.722 | 10. | 7.66  |    |
| 161: | 28 | 260 | 28 | 28 | - | 27 | 260 | 27 | 27 | 498491.992 | 10. | 1.45  |    |
| 162: | 29 | 260 | 29 | 29 | - | 28 | 260 | 28 | 28 | 516257.241 | 10. | 0.51  |    |
| 163: | 30 | 260 | 30 | 30 | - | 29 | 260 | 29 | 29 | 534018.487 | 10. | 0.34  |    |
| 164: | 31 | 260 | 31 | 31 | - | 30 | 260 | 30 | 30 | 551775.589 | 10. | -1.97 |    |
| 165: | 32 | 260 | 32 | 32 | - | 31 | 260 | 31 | 31 | 569528.423 | 10. | 7.63  |    |
| 166: | 47 | 260 | 47 | 47 | - | 46 | 260 | 46 | 46 | 835213.297 | 20. | -2.82 |    |
| 167: | 48 | 260 | 48 | 48 | - | 47 | 260 | 47 | 47 | 852878.865 | 20. | -2.06 |    |
| 168: | 49 | 260 | 49 | 49 | - | 48 | 260 | 48 | 48 | 870537.798 | 30. | -9.01 |    |
| 169: | 50 | 260 | 50 | 50 | - | 49 | 260 | 49 | 49 | 888189.994 | 10. | 12.42 |    |
| 170: | 1  | 61  | 2  | 2  | - | 0  | 61  | 1  | 1  | 17735.389  | 2.  | 2.02  | 22 |
| 171: | 1  | 61  | 1  | 1  | - | 0  | 61  | 1  | 1  | 17735.409  | 2.  | 0.31  | 22 |
| 172: | 2  | 61  | 3  | 3  | - | 1  | 61  | 2  | 2  | 35470.639  | 2.  | -4.01 | 22 |
| 173: | 2  | 61  | 2  | 2  | - | 1  | 61  | 1  | 1  | 35470.658  | 2.  | 0.52  | 22 |
| 174: | 1  | 62  | 2  | 2  | - | 0  | 62  | 1  | 1  | 17649.472  | 2.  | 0.65  | 22 |
| 175: | 1  | 62  | 1  | 1  | - | 0  | 62  | 1  | 1  | 17649.492  | 2.  | -1.06 | 22 |
| 176: | 2  | 62  | 3  | 3  | - | 1  | 62  | 2  | 2  | 35298.809  | 2.  | -2.61 | 22 |
| 177: | 2  | 62  | 2  | 2  | - | 1  | 62  | 1  | 1  | 35298.826  | 2.  | -0.08 | 22 |
| 178: | 1  | 63  | 2  | 2  | - | 0  | 63  | 1  | 1  | 17563.546  | 2.  | 0.93  | 22 |
| 179: | 1  | 63  | 1  | 1  | - | 0  | 63  | 1  | 1  | 17563.566  | 2.  | -0.77 | 22 |
| 180: | 2  | 63  | 3  | 3  | - | 1  | 63  | 2  | 2  | 35126.959  | 2.  | 0.10  | 22 |
| 181: | 2  | 63  | 2  | 2  | - | 1  | 63  | 1  | 1  | 35126.977  | 2.  | 3.63  | 22 |
| 182: | 1  | 64  | 2  | 2  | - | 0  | 64  | 1  | 1  | 17477.604  | 2.  | -1.22 | 22 |
| 183: | 1  | 64  | 1  | 1  | - | 0  | 64  | 1  | 1  | 17477.625  | 2.  | -1.93 | 22 |
| 184: | 2  | 64  | 3  | 3  | - | 1  | 64  | 2  | 2  | 34955.076  | 2.  | -3.07 | 22 |
| 185: | 2  | 64  | 2  | 2  | - | 1  | 64  | 1  | 1  | 34955.094  | 2.  | 0.46  | 22 |
| 186: | 1  | 65  | 2  | 2  | - | 0  | 65  | 1  | 1  | 17391.650  | 2.  | 1.19  | 22 |
| 187: | 1  | 65  | 1  | 1  | - | 0  | 65  | 1  | 1  | 17391.671  | 2.  | 0.49  | 22 |
| 188: | 2  | 65  | 3  | 3  | - | 1  | 65  | 2  | 2  | 34783.166  | 2.  | -0.09 | 22 |
| 189: | 2  | 65  | 2  | 2  | - | 1  | 65  | 1  | 1  | 34783.184  | 2.  | 3.44  | 22 |
| 190: | 1  | 66  | 2  | 2  | - | 0  | 66  | 1  | 1  | 17305.676  | 2.  | 3.27  | 22 |
| 191: | 1  | 66  | 1  | 1  | - | 0  | 66  | 1  | 1  | 17305.694  | 2.  | -0.43 | 22 |
| 192: | 2  | 66  | 3  | 3  | - | 1  | 66  | 2  | 2  | 34611.215  | 2.  | 1.23  | 22 |
| 193: | 2  | 66  | 2  | 2  | - | 1  | 66  | 1  | 1  | 34611.230  | 2.  | 1.76  | 22 |
| 194: | 1  | 67  | 2  | 2  | - | 0  | 67  | 1  | 1  | 17219.676  | 2.  | 2.20  | 22 |
| 195: | 1  | 67  | 1  | 1  | - | 0  | 67  | 1  | 1  | 17219.696  | 2.  | 0.50  | 22 |
| 196: | 2  | 67  | 3  | 3  | - | 1  | 67  | 2  | 2  | 34439.215  | 2.  | -0.74 | 22 |
| 197: | 2  | 67  | 2  | 2  | - | 1  | 67  | 1  | 1  | 34439.234  | 2.  | 3.79  | 22 |
| 198: | 1  | 68  | 2  | 2  | - | 0  | 68  | 1  | 1  | 17133.650  | 2.  | 1.25  | 22 |
| 199: | 1  | 68  | 1  | 1  | - | 0  | 68  | 1  | 1  | 17133.671  | 2.  | 0.54  | 22 |
| 200: | 2  | 68  | 3  | 3  | - | 1  | 68  | 2  | 2  | 34267.166  | 2.  | 0.51  | 22 |
| 201: | 2  | 68  | 2  | 2  | - | 1  | 68  | 1  | 1  | 34267.184  | 2.  | 4.04  | 22 |
| 202: | 1  | 69  | 2  | 2  | - | 0  | 69  | 1  | 1  | 17047.597  | 2.  | 2.73  | 22 |
| 203: | 1  | 69  | 1  | 1  | - | 0  | 69  | 1  | 1  | 17047.617  | 2.  | 1.02  | 22 |
| 204: | 2  | 69  | 3  | 3  | - | 1  | 69  | 2  | 2  | 34095.059  | 2.  | 2.64  | 22 |
| 205: | 2  | 69  | 2  | 2  | - | 1  | 69  | 1  | 1  | 34095.074  | 2.  | 3.17  | 22 |
| 206: | 1  | 70  | 2  | 2  | - | 0  | 70  | 1  | 1  | 16961.509  | 2.  | 2.04  | 22 |
| 207: | 1  | 70  | 1  | 1  | - | 0  | 70  | 1  | 1  | 16961.528  | 2.  | -0.66 | 22 |
| 208: | 2  | 70  | 3  | 3  | - | 1  | 70  | 2  | 2  | 33922.885  | 2.  | 3.45  | 22 |
| 209: | 2  | 70  | 2  | 2  | - | 1  | 70  | 1  | 1  | 33922.900  | 2.  | 3.98  | 22 |
| 210: | 1  | 71  | 2  | 2  | - | 0  | 71  | 1  | 1  | 16875.386  | 2.  | 2.65  | 22 |
| 211: | 1  | 71  | 1  | 1  | - | 0  | 71  | 1  | 1  | 16875.407  | 2.  | 1.95  | 22 |
| 212: | 2  | 71  | 3  | 3  | - | 1  | 71  | 2  | 2  | 33750.635  | 2.  | 0.85  | 22 |
| 213: | 2  | 71  | 2  | 2  | - | 1  | 71  | 1  | 1  | 33750.652  | 2.  | 3.39  | 22 |
| 214: | 1  | 72  | 2  | 2  | - | 0  | 72  | 1  | 1  | 16789.222  | 2.  | 2.07  | 22 |
| 215: | 1  | 72  | 1  | 1  | - | 0  | 72  | 1  | 1  | 16789.241  | 2.  | -0.64 | 22 |
| 216: | 2  | 72  | 3  | 3  | - | 1  | 72  | 2  | 2  | 33578.307  | 2.  | -0.13 | 22 |
| 217: | 2  | 72  | 2  | 2  | - | 1  | 72  | 1  | 1  | 33578.324  | 2.  | 2.40  | 22 |
| 218: | 1  | 73  | 2  | 2  | - | 0  | 73  | 1  | 1  | 16703.015  | 2.  | 1.85  | 22 |
| 219: | 1  | 73  | 1  | 1  | - | 0  | 73  | 1  | 1  | 16703.034  | 2.  | -0.85 | 22 |
| 220: | 2  | 73  | 3  | 3  | - | 1  | 73  | 2  | 2  | 33405.893  | 2.  | -0.37 | 22 |
| 221: | 2  | 73  | 2  | 2  | - | 1  | 73  | 1  | 1  | 33405.908  | 2.  | 0.16  | 22 |
| 222: | 1  | 74  | 2  | 2  | - | 0  | 74  | 1  | 1  | 16616.759  | 2.  | -0.38 | 22 |
| 223: | 1  | 74  | 1  | 1  | - | 0  | 74  | 1  | 1  | 16616.780  | 2.  | -1.09 | 22 |
| 224: | 2  | 74  | 3  | 3  | - | 1  | 74  | 2  | 2  | 33233.383  | 2.  | -2.64 | 22 |
| 225: | 2  | 74  | 2  | 2  | - | 1  | 74  | 1  | 1  | 33233.402  | 2.  | 1.89  | 22 |
| 226: | 1  | 75  | 2  | 2  | - | 0  | 75  | 1  | 1  | 16530.455  | 2.  | 0.02  | 22 |
| 227: | 1  | 75  | 1  | 1  | - | 0  | 75  | 1  | 1  | 16530.476  | 2.  | -0.68 | 22 |
| 228: | 2  | 75  | 3  | 3  | - | 1  | 75  | 2  | 2  | 33060.774  | 2.  | -2.63 | 22 |
| 229: | 2  | 75  | 2  | 2  | - | 1  | 75  | 1  | 1  | 33060.791  | 2.  | -0.09 | 22 |
| 230: | 1  | 76  | 2  | 2  | - | 0  | 76  | 1  | 1  | 16444.096  | 2.  | -0.23 | 22 |

|      |   |    |   |   |   |   |    |   |   |           |    |       |    |
|------|---|----|---|---|---|---|----|---|---|-----------|----|-------|----|
| 231: | 1 | 76 | 1 | 1 | - | 0 | 76 | 1 | 1 | 16444.115 | 2. | -2.93 | 22 |
| 232: | 2 | 76 | 3 | 3 | - | 1 | 76 | 2 | 2 | 32888.055 | 2. | -3.91 | 22 |
| 233: | 2 | 76 | 2 | 2 | - | 1 | 76 | 1 | 1 | 32888.074 | 2. | 0.62  | 22 |
| 234: | 1 | 77 | 2 | 2 | - | 0 | 77 | 1 | 1 | 16357.679 | 2. | -0.38 | 22 |
| 235: | 1 | 77 | 1 | 1 | - | 0 | 77 | 1 | 1 | 16357.699 | 2. | -2.09 | 22 |
| 236: | 2 | 77 | 3 | 3 | - | 1 | 77 | 2 | 2 | 32715.223 | 2. | -2.02 | 22 |
| 237: | 2 | 77 | 2 | 2 | - | 1 | 77 | 1 | 1 | 32715.240 | 2. | 0.52  | 22 |
| 238: | 1 | 78 | 2 | 2 | - | 0 | 78 | 1 | 1 | 16271.200 | 2. | -0.66 | 22 |
| 239: | 1 | 78 | 1 | 1 | - | 0 | 78 | 1 | 1 | 16271.221 | 2. | -1.37 | 22 |
| 240: | 2 | 78 | 3 | 3 | - | 1 | 78 | 2 | 2 | 32542.265 | 2. | -2.36 | 22 |
| 241: | 2 | 78 | 2 | 2 | - | 1 | 78 | 1 | 1 | 32542.284 | 2. | 2.17  | 22 |
| 242: | 1 | 79 | 2 | 2 | - | 0 | 79 | 1 | 1 | 16184.657 | 2. | 0.76  | 22 |
| 243: | 1 | 79 | 1 | 1 | - | 0 | 79 | 1 | 1 | 16184.675 | 2. | -2.94 | 22 |
| 244: | 2 | 79 | 3 | 3 | - | 1 | 79 | 2 | 2 | 32369.177 | 2. | -1.29 | 22 |
| 245: | 2 | 79 | 2 | 2 | - | 1 | 79 | 1 | 1 | 32369.193 | 2. | 0.24  | 22 |
| 246: | 1 | 80 | 2 | 2 | - | 0 | 80 | 1 | 1 | 16098.042 | 2. | -0.24 | 22 |
| 247: | 1 | 80 | 1 | 1 | - | 0 | 80 | 1 | 1 | 16098.061 | 2. | -2.95 | 22 |
| 248: | 2 | 80 | 3 | 3 | - | 1 | 80 | 2 | 2 | 32195.947 | 2. | -3.06 | 22 |
| 249: | 2 | 80 | 2 | 2 | - | 1 | 80 | 1 | 1 | 32195.967 | 2. | 2.47  | 22 |
| 250: | 1 | 81 | 2 | 2 | - | 0 | 81 | 1 | 1 | 16011.356 | 2. | 1.24  | 22 |
| 251: | 1 | 81 | 1 | 1 | - | 0 | 81 | 1 | 1 | 16011.374 | 2. | -2.46 | 22 |
| 252: | 2 | 81 | 3 | 3 | - | 1 | 81 | 2 | 2 | 32022.573 | 2. | -1.86 | 22 |
| 253: | 2 | 81 | 2 | 2 | - | 1 | 81 | 1 | 1 | 32022.590 | 2. | 0.67  | 22 |
| 254: | 1 | 82 | 2 | 2 | - | 0 | 82 | 1 | 1 | 15924.590 | 2. | 0.16  | 22 |
| 255: | 1 | 82 | 1 | 1 | - | 0 | 82 | 1 | 1 | 15924.609 | 2. | -2.54 | 22 |
| 256: | 2 | 82 | 3 | 3 | - | 1 | 82 | 2 | 2 | 31849.043 | 2. | -1.78 | 22 |
| 257: | 2 | 82 | 2 | 2 | - | 1 | 82 | 1 | 1 | 31849.062 | 2. | 2.75  | 22 |
| 258: | 1 | 83 | 2 | 2 | - | 0 | 83 | 1 | 1 | 15837.743 | 2. | -0.48 | 22 |
| 259: | 1 | 83 | 1 | 1 | - | 0 | 83 | 1 | 1 | 15837.763 | 2. | -2.18 | 22 |
| 260: | 2 | 83 | 3 | 3 | - | 1 | 83 | 2 | 2 | 31675.352 | 2. | 0.18  | 22 |
| 261: | 2 | 83 | 2 | 2 | - | 1 | 83 | 1 | 1 | 31675.369 | 2. | 2.71  | 22 |
| 262: | 1 | 84 | 2 | 2 | - | 0 | 84 | 1 | 1 | 15750.811 | 2. | -0.64 |    |
| 263: | 1 | 84 | 1 | 1 | - | 0 | 84 | 1 | 1 | 15750.834 | 2. | 0.66  |    |
| 264: | 2 | 84 | 3 | 3 | - | 1 | 84 | 2 | 2 | 31501.487 | 2. | -0.89 | 22 |
| 265: | 2 | 84 | 2 | 2 | - | 1 | 84 | 1 | 1 | 31501.506 | 2. | 3.65  | 22 |
| 266: | 1 | 85 | 2 | 2 | - | 0 | 85 | 1 | 1 | 15663.790 | 2. | -0.21 |    |
| 267: | 1 | 85 | 1 | 1 | - | 0 | 85 | 1 | 1 | 15663.813 | 2. | 1.09  |    |
| 268: | 2 | 85 | 3 | 3 | - | 1 | 85 | 2 | 2 | 31327.444 | 2. | -0.78 | 22 |
| 269: | 2 | 85 | 2 | 2 | - | 1 | 85 | 1 | 1 | 31327.463 | 2. | 3.75  | 22 |
| 270: | 1 | 86 | 2 | 2 | - | 0 | 86 | 1 | 1 | 15576.677 | 2. | 1.95  |    |
| 271: | 1 | 86 | 1 | 1 | - | 0 | 86 | 1 | 1 | 15576.697 | 2. | 0.25  |    |
| 272: | 2 | 86 | 3 | 3 | - | 1 | 86 | 2 | 2 | 31153.215 | 2. | 0.80  | 22 |
| 273: | 2 | 86 | 2 | 2 | - | 1 | 86 | 1 | 1 | 31153.232 | 2. | 3.33  | 22 |
| 274: | 1 | 87 | 2 | 2 | - | 0 | 87 | 1 | 1 | 15489.465 | 2. | 3.06  |    |
| 275: | 1 | 87 | 1 | 1 | - | 0 | 87 | 1 | 1 | 15489.480 | 2. | -3.64 |    |
| 276: | 2 | 87 | 3 | 3 | - | 1 | 87 | 2 | 2 | 30978.788 | 2. | 0.28  | 22 |
| 277: | 2 | 87 | 2 | 2 | - | 1 | 87 | 1 | 1 | 30978.806 | 2. | 3.81  | 22 |
| 278: | 1 | 88 | 2 | 2 | - | 0 | 88 | 1 | 1 | 15402.147 | 2. | 0.39  |    |
| 279: | 1 | 88 | 1 | 1 | - | 0 | 88 | 1 | 1 | 15402.168 | 2. | -0.31 |    |
| 280: | 2 | 88 | 3 | 3 | - | 1 | 88 | 2 | 2 | 30804.158 | 2. | 1.22  | 22 |
| 281: | 2 | 88 | 2 | 2 | - | 1 | 88 | 1 | 1 | 30804.174 | 2. | 2.75  | 22 |
| 282: | 2 | 89 | 3 | 3 | - | 1 | 89 | 2 | 2 | 30629.315 | 2. | 2.31  | 22 |
| 283: | 2 | 89 | 2 | 2 | - | 1 | 89 | 1 | 1 | 30629.331 | 2. | 3.84  | 22 |
| 284: | 1 | 90 | 2 | 2 | - | 0 | 90 | 1 | 1 | 15227.192 | 2. | 0.20  |    |
| 285: | 1 | 90 | 1 | 1 | - | 0 | 90 | 1 | 1 | 15227.212 | 2. | -1.50 |    |
| 286: | 1 | 91 | 2 | 2 | - | 0 | 91 | 1 | 1 | 15139.546 | 2. | 2.61  |    |
| 287: | 1 | 91 | 1 | 1 | - | 0 | 91 | 1 | 1 | 15139.567 | 2. | 1.90  |    |

(30)Si(32)S

|      |    |     |    |    |   |    |     |    |    |            |     |       |    |
|------|----|-----|----|----|---|----|-----|----|----|------------|-----|-------|----|
| 288: | 1  | 100 | 1  | 1  | - | 0  | 100 | 0  | 0  | 17510.647  | 2.  | 2.32  |    |
| 289: | 2  | 100 | 2  | 2  | - | 1  | 100 | 1  | 1  | 35021.156  | 2.  | -0.09 |    |
| 290: | 3  | 100 | 3  | 3  | - | 2  | 100 | 2  | 2  | 52531.408  | 12. | 7.07  | 17 |
| 291: | 20 | 100 | 20 | 20 | - | 19 | 100 | 19 | 19 | 350035.636 | 10. | 5.01  |    |
| 292: | 21 | 100 | 21 | 21 | - | 20 | 100 | 20 | 20 | 367518.292 | 10. | 5.25  |    |
| 293: | 22 | 100 | 22 | 22 | - | 21 | 100 | 21 | 21 | 384998.147 | 10. | 3.41  |    |
| 294: | 23 | 100 | 23 | 23 | - | 22 | 100 | 22 | 22 | 402475.070 | 10. | 1.78  |    |
| 295: | 24 | 100 | 24 | 24 | - | 23 | 100 | 23 | 23 | 419948.938 | 10. | 10.63 |    |
| 296: | 25 | 100 | 25 | 25 | - | 24 | 100 | 24 | 24 | 437419.589 | 10. | 1.25  |    |
| 297: | 29 | 100 | 29 | 29 | - | 28 | 100 | 28 | 28 | 507267.575 | 10. | -0.74 |    |
| 298: | 30 | 100 | 30 | 30 | - | 29 | 100 | 29 | 29 | 524720.246 | 10. | 3.09  |    |
| 299: | 31 | 100 | 31 | 31 | - | 30 | 100 | 30 | 30 | 542168.910 | 10. | -1.56 |    |

|      |    |     |    |    |   |    |     |    |    |            |     |        |
|------|----|-----|----|----|---|----|-----|----|----|------------|-----|--------|
| 300: | 32 | 100 | 32 | 32 | - | 31 | 100 | 31 | 31 | 559613.449 | 10. | 0.59   |
| 301: | 33 | 100 | 33 | 33 | - | 32 | 100 | 32 | 32 | 577053.717 | 10. | -3.16  |
| 302: | 50 | 100 | 50 | 50 | - | 49 | 100 | 49 | 49 | 872756.595 | 20. | -19.01 |
| 303: | 51 | 100 | 51 | 51 | - | 50 | 100 | 50 | 50 | 890097.332 | 50. | 12.29  |
| 304: | 53 | 100 | 53 | 53 | - | 52 | 100 | 52 | 52 | 924758.180 | 20. | -24.18 |
| 305: | 1  | 101 | 1  | 1  | - | 0  | 101 | 0  | 0  | 17426.975  | 2.  | -1.19  |
| 306: | 2  | 101 | 2  | 2  | - | 1  | 101 | 1  | 1  | 34853.816  | 2.  | -2.97  |
| 307: | 3  | 101 | 3  | 3  | - | 2  | 101 | 2  | 2  | 52280.392  | 40. | -2.94  |
| 308: | 1  | 102 | 1  | 1  | - | 0  | 102 | 0  | 0  | 17343.299  | 2.  | -1.15  |
| 309: | 2  | 102 | 2  | 2  | - | 1  | 102 | 1  | 1  | 34686.467  | 2.  | 0.24   |
| 310: | 1  | 103 | 1  | 1  | - | 0  | 103 | 0  | 0  | 17259.611  | 2.  | -2.89  |
| 311: | 2  | 103 | 2  | 2  | - | 1  | 103 | 1  | 1  | 34519.096  | 2.  | 1.90   |
| 312: | 1  | 104 | 1  | 1  | - | 0  | 104 | 0  | 0  | 17175.914  | 2.  | -0.62  |
| 313: | 2  | 104 | 2  | 2  | - | 1  | 104 | 1  | 1  | 34351.695  | 2.  | -0.43  |
| 314: | 1  | 105 | 1  | 1  | - | 0  | 105 | 0  | 0  | 17092.199  | 2.  | -0.48  |
| 315: | 2  | 105 | 2  | 2  | - | 1  | 105 | 1  | 1  | 34184.264  | 2.  | -1.00  |
| 316: | 1  | 106 | 1  | 1  | - | 0  | 106 | 0  | 0  | 17008.467  | 2.  | 1.51   |
| 317: | 2  | 106 | 2  | 2  | - | 1  | 106 | 1  | 1  | 34016.795  | 2.  | -1.88  |
| 318: | 1  | 107 | 1  | 1  | - | 0  | 107 | 0  | 0  | 16924.711  | 2.  | 1.37   |
| 319: | 2  | 107 | 2  | 2  | - | 1  | 107 | 1  | 1  | 33849.287  | 2.  | 2.01   |
| 320: | 1  | 108 | 1  | 1  | - | 0  | 108 | 0  | 0  | 16840.930  | 2.  | 1.24   |
| 321: | 2  | 108 | 2  | 2  | - | 1  | 108 | 1  | 1  | 33681.723  | 2.  | -0.10  |
| 322: | 1  | 109 | 1  | 1  | - | 0  | 109 | 0  | 0  | 16757.120  | 2.  | 0.28   |
| 323: | 2  | 109 | 2  | 2  | - | 1  | 109 | 1  | 1  | 33514.105  | 2.  | 0.15   |
| 324: | 1  | 110 | 1  | 1  | - | 0  | 110 | 0  | 0  | 16673.279  | 2.  | -0.25  |
| 325: | 2  | 110 | 2  | 2  | - | 1  | 110 | 1  | 1  | 33346.428  | 2.  | 4.25   |
| 326: | 1  | 111 | 1  | 1  | - | 0  | 111 | 0  | 0  | 16589.406  | 2.  | 1.94   |
| 327: | 2  | 111 | 2  | 2  | - | 1  | 111 | 1  | 1  | 33178.674  | 2.  | 0.82   |
| 328: | 1  | 112 | 1  | 1  | - | 0  | 112 | 0  | 0  | 16505.491  | 2.  | 0.22   |
| 329: | 2  | 112 | 2  | 2  | - | 1  | 112 | 1  | 1  | 33010.846  | 2.  | -0.45  |
| 330: | 1  | 113 | 1  | 1  | - | 0  | 113 | 0  | 0  | 16421.536  | 2.  | -0.01  |
| 331: | 2  | 113 | 2  | 2  | - | 1  | 113 | 1  | 1  | 32842.936  | 2.  | -0.73  |
| 332: | 1  | 114 | 1  | 1  | - | 0  | 114 | 0  | 0  | 16337.536  | 2.  | -0.30  |
| 333: | 2  | 114 | 2  | 2  | - | 1  | 114 | 1  | 1  | 32674.936  | 2.  | -1.12  |
| 334: | 1  | 115 | 1  | 1  | - | 0  | 115 | 0  | 0  | 16253.487  | 2.  | -1.16  |
| 335: | 2  | 115 | 2  | 2  | - | 1  | 115 | 1  | 1  | 32506.839  | 2.  | -1.64  |
| 336: | 1  | 116 | 1  | 1  | - | 0  | 116 | 0  | 0  | 16169.387  | 2.  | -1.03  |
| 337: | 2  | 116 | 2  | 2  | - | 1  | 116 | 1  | 1  | 32338.638  | 2.  | -2.19  |
| 338: | 1  | 117 | 1  | 1  | - | 0  | 117 | 0  | 0  | 16085.231  | 2.  | -1.36  |
| 339: | 2  | 117 | 2  | 2  | - | 1  | 117 | 1  | 1  | 32170.326  | 2.  | -2.64  |
| 340: | 1  | 118 | 1  | 1  | - | 0  | 118 | 0  | 0  | 16001.016  | 2.  | -1.51  |
| 341: | 2  | 118 | 2  | 2  | - | 1  | 118 | 1  | 1  | 32001.897  | 2.  | -1.73  |
| 342: | 1  | 119 | 1  | 1  | - | 0  | 119 | 0  | 0  | 15916.738  | 2.  | -1.83  |
| 343: | 2  | 119 | 2  | 2  | - | 1  | 119 | 1  | 1  | 31833.339  | 2.  | -4.15  |
| 344: | 1  | 120 | 1  | 1  | - | 0  | 120 | 0  | 0  | 15832.395  | 2.  | -0.62  |
| 345: | 1  | 121 | 1  | 1  | - | 0  | 121 | 0  | 0  | 15747.979  | 2.  | -2.16  |
| 346: | 2  | 121 | 2  | 2  | - | 1  | 121 | 1  | 1  | 31495.822  | 2.  | -3.38  |
| 347: | 1  | 122 | 1  | 1  | - | 0  | 122 | 0  | 0  | 15663.491  | 2.  | -1.66  |
| 348: | 2  | 122 | 2  | 2  | - | 1  | 122 | 1  | 1  | 31326.845  | 2.  | -3.15  |
| 349: | 1  | 123 | 1  | 1  | - | 0  | 123 | 0  | 0  | 15578.926  | 2.  | -0.30  |
| 350: | 1  | 124 | 1  | 1  | - | 0  | 124 | 0  | 0  | 15494.277  | 2.  | -1.23  |
| 351: | 1  | 125 | 1  | 1  | - | 0  | 125 | 0  | 0  | 15409.544  | 2.  | -0.52  |
| 352: | 1  | 126 | 1  | 1  | - | 0  | 126 | 0  | 0  | 15324.721  | 2.  | -0.23  |
| 353: | 1  | 127 | 1  | 1  | - | 0  | 127 | 0  | 0  | 15239.805  | 2.  | 0.67   |
| 354: | 1  | 128 | 1  | 1  | - | 0  | 128 | 0  | 0  | 15154.791  | 2.  | 1.26   |
| 355: | 1  | 129 | 1  | 1  | - | 0  | 129 | 0  | 0  | 15069.674  | 2.  | 0.68   |
| 356: | 1  | 130 | 1  | 1  | - | 0  | 130 | 0  | 0  | 14984.452  | 2.  | 1.14   |
| 357: | 1  | 131 | 1  | 1  | - | 0  | 131 | 0  | 0  | 14899.118  | 2.  | -0.07  |
| 358: | 1  | 132 | 1  | 1  | - | 0  | 132 | 0  | 0  | 14813.671  | 2.  | 0.44   |
| 359: | 1  | 133 | 1  | 1  | - | 0  | 133 | 0  | 0  | 14728.104  | 2.  | 0.12   |

17

(28)Si(33)S

|      |   |     |   |   |   |   |     |   |   |           |    |       |
|------|---|-----|---|---|---|---|-----|---|---|-----------|----|-------|
| 360: | 1 | 140 | 1 | 1 | - | 0 | 140 | 2 | 2 | 17895.651 | 2. | 0.89  |
| 361: | 1 | 140 | 3 | 3 | - | 0 | 140 | 2 | 2 | 17897.869 | 2. | 0.52  |
| 362: | 1 | 140 | 2 | 2 | - | 0 | 140 | 2 | 2 | 17900.591 | 2. | 1.93  |
| 363: | 2 | 140 | 1 | 1 | - | 1 | 140 | 2 | 2 | 35791.721 | 2. | 2.17  |
| 364: | 2 | 140 | 2 | 2 | - | 1 | 140 | 2 | 2 | 35794.469 | 2. | 1.48  |
| 365: | 2 | 140 | 3 | 3 | - | 1 | 140 | 2 | 2 | 35796.438 | 2. | -2.61 |
| 366: | 2 | 140 | 4 | 4 | - | 1 | 140 | 3 | 3 | 35796.447 | 2. | -0.63 |
| 367: | 2 | 140 | 1 | 1 | - | 1 | 140 | 1 | 1 | 35796.662 | 2. | 4.21  |
| 368: | 2 | 140 | 2 | 2 | - | 1 | 140 | 3 | 3 | 35797.189 | 2. | 0.88  |

|      |    |     |    |    |   |    |     |    |    |            |     |        |
|------|----|-----|----|----|---|----|-----|----|----|------------|-----|--------|
| 369: | 2  | 140 | 3  | 3  | - | 1  | 140 | 3  | 3  | 35799.162  | 2.  | 0.80   |
| 370: | 2  | 140 | 2  | 2  | - | 1  | 140 | 1  | 1  | 35799.408  | 2.  | 1.52   |
| 371: | 19 | 261 | 19 | 19 | - | 18 | 261 | 18 | 18 | 339910.961 | 10. | 8.54   |
| 372: | 20 | 261 | 20 | 20 | - | 19 | 261 | 19 | 19 | 357782.913 | 10. | 13.84  |
| 373: | 21 | 261 | 21 | 21 | - | 20 | 261 | 20 | 20 | 375652.058 | 10. | -2.70  |
| 374: | 22 | 261 | 22 | 22 | - | 21 | 261 | 21 | 21 | 393518.302 | 10. | 4.19   |
| 375: | 23 | 261 | 23 | 23 | - | 22 | 261 | 22 | 22 | 411381.484 | 10. | 12.76  |
| 376: | 24 | 261 | 24 | 24 | - | 23 | 261 | 23 | 23 | 429241.455 | 10. | 13.29  |
| 377: | 28 | 261 | 28 | 28 | - | 27 | 261 | 27 | 27 | 500646.511 | 10. | 2.16   |
| 378: | 29 | 261 | 29 | 29 | - | 28 | 261 | 28 | 28 | 518488.381 | 10. | 5.40   |
| 379: | 30 | 261 | 30 | 30 | - | 29 | 261 | 29 | 29 | 536326.203 | 10. | -0.81  |
| 380: | 31 | 261 | 31 | 31 | - | 30 | 261 | 30 | 30 | 554159.839 | 10. | -15.20 |
| 381: | 32 | 261 | 32 | 32 | - | 31 | 261 | 31 | 31 | 571989.185 | 10. | -2.52  |
| 382: | 1  | 141 | 1  | 1  | - | 0  | 141 | 2  | 2  | 17809.245  | 2.  | -0.36  |
| 383: | 1  | 141 | 3  | 3  | - | 0  | 141 | 2  | 2  | 17811.413  | 2.  | -1.21  |
| 384: | 1  | 141 | 2  | 2  | - | 0  | 141 | 2  | 2  | 17814.074  | 2.  | 1.09   |
| 385: | 2  | 141 | 1  | 1  | - | 1  | 141 | 2  | 2  | 35618.895  | 2.  | -1.83  |
| 386: | 2  | 141 | 2  | 2  | - | 1  | 141 | 2  | 2  | 35621.586  | 2.  | 2.38   |
| 387: | 2  | 141 | 3  | 3  | - | 1  | 141 | 2  | 2  | 35623.508  | 2.  | -4.50  |
| 388: | 2  | 141 | 4  | 4  | - | 1  | 141 | 3  | 3  | 35623.520  | 2.  | 0.48   |
| 389: | 2  | 141 | 1  | 1  | - | 1  | 141 | 1  | 1  | 35623.723  | 2.  | -1.38  |
| 390: | 2  | 141 | 2  | 2  | - | 1  | 141 | 3  | 3  | 35624.244  | 2.  | 1.68   |
| 391: | 2  | 141 | 3  | 3  | - | 1  | 141 | 3  | 3  | 35626.170  | 2.  | -1.19  |
| 392: | 2  | 141 | 2  | 2  | - | 1  | 141 | 1  | 1  | 35626.410  | 2.  | -1.17  |
| 393: | 1  | 142 | 1  | 1  | - | 0  | 142 | 2  | 2  | 17722.832  | 2.  | -0.12  |
| 394: | 1  | 142 | 3  | 3  | - | 0  | 142 | 2  | 2  | 17724.950  | 2.  | -1.91  |
| 395: | 1  | 142 | 2  | 2  | - | 0  | 142 | 2  | 2  | 17727.549  | 2.  | -0.27  |
| 396: | 2  | 142 | 1  | 1  | - | 1  | 142 | 2  | 2  | 35446.053  | 2.  | -4.96  |
| 397: | 2  | 142 | 2  | 2  | - | 1  | 142 | 2  | 2  | 35448.684  | 2.  | 0.59   |
| 398: | 2  | 142 | 3  | 3  | - | 1  | 142 | 2  | 2  | 35450.564  | 2.  | -4.48  |
| 399: | 2  | 142 | 4  | 4  | - | 1  | 142 | 3  | 3  | 35450.576  | 2.  | 0.50   |
| 400: | 2  | 142 | 1  | 1  | - | 1  | 142 | 1  | 1  | 35450.773  | 2.  | -2.10  |
| 401: | 2  | 142 | 2  | 2  | - | 1  | 142 | 3  | 3  | 35451.279  | 2.  | -1.77  |
| 402: | 2  | 142 | 3  | 3  | - | 1  | 142 | 3  | 3  | 35453.166  | 2.  | 0.16   |
| 403: | 2  | 142 | 2  | 2  | - | 1  | 142 | 1  | 1  | 35453.400  | 2.  | -0.55  |
| 404: | 1  | 143 | 1  | 1  | - | 0  | 143 | 2  | 2  | 17636.406  | 2.  | -1.56  |
| 405: | 1  | 143 | 3  | 3  | - | 0  | 143 | 2  | 2  | 17638.478  | 2.  | -0.73  |
| 406: | 1  | 143 | 2  | 2  | - | 0  | 143 | 2  | 2  | 17641.015  | 2.  | -0.32  |
| 407: | 2  | 143 | 2  | 2  | - | 1  | 143 | 2  | 2  | 35275.760  | 2.  | -1.22  |
| 408: | 2  | 143 | 3  | 3  | - | 1  | 143 | 2  | 2  | 35277.603  | 2.  | 0.11   |
| 409: | 2  | 143 | 4  | 4  | - | 1  | 143 | 3  | 3  | 35277.609  | 2.  | -0.91  |
| 410: | 2  | 143 | 1  | 1  | - | 1  | 143 | 1  | 1  | 35277.805  | 2.  | 0.69   |
| 411: | 2  | 143 | 3  | 3  | - | 1  | 143 | 3  | 3  | 35280.139  | 2.  | -0.48  |
| 412: | 2  | 143 | 2  | 2  | - | 1  | 143 | 1  | 1  | 35280.367  | 2.  | -1.98  |
| 413: | 1  | 144 | 1  | 1  | - | 0  | 144 | 2  | 2  | 17549.970  | 2.  | 1.26   |
| 414: | 1  | 144 | 3  | 3  | - | 0  | 144 | 2  | 2  | 17551.993  | 2.  | 1.25   |
| 415: | 1  | 144 | 2  | 2  | - | 0  | 144 | 2  | 2  | 17554.469  | 2.  | 0.88   |
| 416: | 2  | 144 | 2  | 2  | - | 1  | 144 | 2  | 2  | 35102.811  | 2.  | -0.17  |
| 417: | 2  | 144 | 3  | 3  | - | 1  | 144 | 2  | 2  | 35104.607  | 2.  | -2.85  |
| 418: | 2  | 144 | 4  | 4  | - | 1  | 144 | 3  | 3  | 35104.617  | 2.  | 0.13   |
| 419: | 2  | 144 | 1  | 1  | - | 1  | 144 | 1  | 1  | 35104.807  | 2.  | 0.90   |
| 420: | 2  | 144 | 3  | 3  | - | 1  | 144 | 3  | 3  | 35107.086  | 2.  | -0.22  |
| 421: | 2  | 144 | 2  | 2  | - | 1  | 144 | 1  | 1  | 35107.311  | 2.  | 0.45   |
| 422: | 1  | 145 | 1  | 1  | - | 0  | 145 | 2  | 2  | 17463.512  | 2.  | -0.61  |
| 423: | 1  | 145 | 3  | 3  | - | 0  | 145 | 2  | 2  | 17465.487  | 2.  | -0.90  |
| 424: | 1  | 145 | 2  | 2  | - | 0  | 145 | 2  | 2  | 17467.904  | 2.  | -0.63  |
| 425: | 2  | 145 | 2  | 2  | - | 1  | 145 | 2  | 2  | 34929.826  | 2.  | -1.19  |
| 426: | 2  | 145 | 3  | 3  | - | 1  | 145 | 2  | 2  | 34931.580  | 2.  | -3.26  |
| 427: | 2  | 145 | 4  | 4  | - | 1  | 145 | 3  | 3  | 34931.592  | 2.  | 1.72   |
| 428: | 2  | 145 | 1  | 1  | - | 1  | 145 | 1  | 1  | 34931.779  | 2.  | 4.60   |
| 429: | 2  | 145 | 3  | 3  | - | 1  | 145 | 3  | 3  | 34933.998  | 2.  | -1.99  |
| 430: | 2  | 145 | 2  | 2  | - | 1  | 145 | 1  | 1  | 34934.219  | 2.  | -0.21  |
| 431: | 1  | 146 | 1  | 1  | - | 0  | 146 | 2  | 2  | 17377.035  | 2.  | -1.04  |
| 432: | 1  | 146 | 3  | 3  | - | 0  | 146 | 2  | 2  | 17378.964  | 2.  | -0.07  |
| 433: | 1  | 146 | 2  | 2  | - | 0  | 146 | 2  | 2  | 17381.321  | 2.  | -0.71  |
| 434: | 2  | 146 | 2  | 2  | - | 1  | 146 | 2  | 2  | 34756.801  | 2.  | -2.00  |
| 435: | 2  | 146 | 3  | 3  | - | 1  | 146 | 2  | 2  | 34758.514  | 2.  | -2.87  |
| 436: | 2  | 146 | 4  | 4  | - | 1  | 146 | 3  | 3  | 34758.525  | 2.  | 1.11   |
| 437: | 2  | 146 | 1  | 1  | - | 1  | 146 | 1  | 1  | 34758.701  | 2.  | -1.95  |
| 438: | 2  | 146 | 3  | 3  | - | 1  | 146 | 3  | 3  | 34760.875  | 2.  | 0.49   |
| 439: | 2  | 146 | 2  | 2  | - | 1  | 146 | 1  | 1  | 34761.090  | 2.  | 1.34   |

|      |   |     |   |   |   |   |     |   |   |           |    |       |        |
|------|---|-----|---|---|---|---|-----|---|---|-----------|----|-------|--------|
| 440: | 1 | 147 | 1 | 1 | - | 0 | 147 | 2 | 2 | 17290.535 | 2. | -0.82 |        |
| 441: | 1 | 147 | 3 | 3 | - | 0 | 147 | 2 | 2 | 17292.419 | 2. | 1.97  |        |
| 442: | 1 | 147 | 2 | 2 | - | 0 | 147 | 2 | 2 | 17294.717 | 2. | 0.86  |        |
| 443: | 2 | 147 | 2 | 2 | - | 1 | 147 | 2 | 2 | 34583.734 | 2. | 1.84  |        |
| 444: | 2 | 147 | 3 | 3 | - | 1 | 147 | 2 | 2 | 34585.402 | 2. | -2.24 |        |
| 445: | 2 | 147 | 4 | 4 | - | 1 | 147 | 3 | 3 | 34585.414 | 2. | 2.74  |        |
| 446: | 2 | 147 | 1 | 1 | - | 1 | 147 | 1 | 1 | 34585.588 | 2. | 2.70  |        |
| 447: | 2 | 147 | 3 | 3 | - | 1 | 147 | 3 | 3 | 34587.703 | 2. | -0.36 |        |
| 448: | 2 | 147 | 2 | 2 | - | 1 | 147 | 1 | 1 | 34587.910 | 2. | -2.49 |        |
| 449: | 1 | 148 | 1 | 1 | - | 0 | 148 | 2 | 2 | 17204.009 | 2. | 0.36  |        |
| 450: | 1 | 148 | 3 | 3 | - | 0 | 148 | 2 | 2 | 17205.846 | 2. | 2.51  |        |
| 451: | 1 | 148 | 2 | 2 | - | 0 | 148 | 2 | 2 | 17208.085 | 2. | 0.36  |        |
| 452: | 2 | 148 | 2 | 2 | - | 1 | 148 | 2 | 2 | 34410.605 | 2. | -3.09 |        |
| 453: | 2 | 148 | 3 | 3 | - | 1 | 148 | 2 | 2 | 34412.246 | 2. | 2.63  | 0.3446 |
| 454: | 2 | 148 | 4 | 4 | - | 1 | 148 | 3 | 3 | 34412.246 | 2. | 2.63  | 0.6554 |
| 455: | 2 | 148 | 1 | 1 | - | 1 | 148 | 1 | 1 | 34412.414 | 2. | -0.87 |        |
| 456: | 2 | 148 | 3 | 3 | - | 1 | 148 | 3 | 3 | 34414.482 | 2. | 2.07  |        |
| 457: | 2 | 148 | 2 | 2 | - | 1 | 148 | 1 | 1 | 34414.680 | 2. | -4.09 |        |
| 458: | 1 | 149 | 1 | 1 | - | 0 | 149 | 2 | 2 | 17117.452 | 2. | 0.86  |        |
| 459: | 1 | 149 | 3 | 3 | - | 0 | 149 | 2 | 2 | 17119.240 | 2. | -0.07 |        |
| 460: | 1 | 149 | 2 | 2 | - | 0 | 149 | 2 | 2 | 17121.425 | 2. | 1.17  |        |
| 461: | 2 | 149 | 2 | 2 | - | 1 | 149 | 2 | 2 | 34237.426 | 2. | 1.95  |        |
| 462: | 2 | 149 | 3 | 3 | - | 1 | 149 | 2 | 2 | 34239.016 | 2. | 2.26  |        |
| 463: | 2 | 149 | 4 | 4 | - | 1 | 149 | 3 | 3 | 34239.025 | 2. | 4.24  |        |
| 464: | 2 | 149 | 3 | 3 | - | 1 | 149 | 3 | 3 | 34241.197 | 2. | -0.50 |        |
| 465: | 2 | 149 | 2 | 2 | - | 1 | 149 | 1 | 1 | 34241.395 | 2. | -1.73 |        |
| 466: | 1 | 150 | 1 | 1 | - | 0 | 150 | 2 | 2 | 17030.860 | 2. | 0.11  |        |
| 467: | 1 | 150 | 3 | 3 | - | 0 | 150 | 2 | 2 | 17032.604 | 2. | 0.64  |        |
| 468: | 1 | 150 | 2 | 2 | - | 0 | 150 | 2 | 2 | 17034.730 | 2. | -0.28 |        |
| 469: | 2 | 150 | 3 | 3 | - | 1 | 150 | 2 | 2 | 34065.721 | 2. | -1.27 |        |
| 470: | 2 | 150 | 4 | 4 | - | 1 | 150 | 3 | 3 | 34065.730 | 2. | 0.72  |        |
| 471: | 1 | 151 | 1 | 1 | - | 0 | 151 | 2 | 2 | 16944.231 | 2. | -0.39 |        |
| 472: | 1 | 151 | 3 | 3 | - | 0 | 151 | 2 | 2 | 16945.932 | 2. | 2.16  |        |
| 473: | 1 | 151 | 2 | 2 | - | 0 | 151 | 2 | 2 | 16948.002 | 2. | 1.51  |        |
| 474: | 1 | 152 | 1 | 1 | - | 0 | 152 | 2 | 2 | 16857.562 | 2. | -0.08 |        |
| 475: | 1 | 152 | 3 | 3 | - | 0 | 152 | 2 | 2 | 16859.217 | 2. | 1.03  |        |
| 476: | 1 | 152 | 2 | 2 | - | 0 | 152 | 2 | 2 | 16861.229 | 2. | -1.91 |        |
| 477: | 1 | 153 | 1 | 1 | - | 0 | 153 | 2 | 2 | 16770.849 | 2. | 0.62  |        |
| 478: | 1 | 153 | 3 | 3 | - | 0 | 153 | 2 | 2 | 16772.459 | 2. | 0.85  |        |
| 479: | 1 | 153 | 2 | 2 | - | 0 | 153 | 2 | 2 | 16774.416 | 2. | -1.93 |        |
| 480: | 1 | 154 | 1 | 1 | - | 0 | 154 | 2 | 2 | 16684.087 | 2. | 0.39  |        |
| 481: | 1 | 154 | 3 | 3 | - | 0 | 154 | 2 | 2 | 16685.652 | 2. | -0.71 |        |
| 482: | 1 | 154 | 2 | 2 | - | 0 | 154 | 2 | 2 | 16687.559 | 2. | 1.09  |        |
| 483: | 1 | 155 | 1 | 1 | - | 0 | 155 | 2 | 2 | 16597.272 | 2. | -1.08 |        |
| 484: | 1 | 155 | 3 | 3 | - | 0 | 155 | 2 | 2 | 16598.796 | 2. | 0.03  |        |
| 485: | 1 | 155 | 2 | 2 | - | 0 | 155 | 2 | 2 | 16600.647 | 2. | -0.15 |        |
| 486: | 1 | 156 | 1 | 1 | - | 0 | 156 | 2 | 2 | 16510.403 | 2. | -1.04 |        |
| 487: | 1 | 156 | 3 | 3 | - | 0 | 156 | 2 | 2 | 16511.883 | 2. | -1.17 |        |
| 488: | 1 | 156 | 2 | 2 | - | 0 | 156 | 2 | 2 | 16513.683 | 2. | 1.12  |        |

(29)Si(33)S

|      |   |     |   |   |   |   |     |   |   |           |    |       |        |
|------|---|-----|---|---|---|---|-----|---|---|-----------|----|-------|--------|
| 489: | 1 | 160 | 1 | 0 | - | 0 | 160 | 2 | 1 | 17562.050 | 2. | 0.12  |        |
| 490: | 1 | 160 | 1 | 1 | - | 0 | 160 | 2 | 2 | 17562.061 | 2. | 1.80  |        |
| 491: | 1 | 160 | 3 | 3 | - | 0 | 160 | 2 | 2 | 17564.268 | 2. | 0.25  |        |
| 492: | 1 | 160 | 3 | 2 | - | 0 | 160 | 2 | 1 | 17564.284 | 2. | -1.02 |        |
| 493: | 1 | 160 | 2 | 2 | - | 0 | 160 | 2 | 2 | 17566.993 | 2. | -0.52 |        |
| 494: | 1 | 160 | 2 | 1 | - | 0 | 160 | 2 | 1 | 17567.003 | 2. | 2.34  |        |
| 495: | 2 | 160 | 3 | 3 | - | 1 | 160 | 2 | 2 | 35129.250 | 2. | -0.72 |        |
| 496: | 2 | 160 | 4 | 4 | - | 1 | 160 | 3 | 3 | 35129.262 | 2. | 3.13  |        |
| 497: | 2 | 160 | 3 | 2 | - | 1 | 160 | 2 | 1 | 35129.275 | 2. | 1.91  | 0.3199 |
| 498: | 2 | 160 | 4 | 3 | - | 1 | 160 | 3 | 2 | 35129.275 | 2. | 1.91  | 0.6801 |
| 499: | 2 | 160 | 1 | 1 | - | 1 | 160 | 1 | 1 | 35129.469 | 2. | 1.71  |        |
| 500: | 2 | 160 | 1 | 1 | - | 1 | 160 | 1 | 0 | 35129.482 | 2. | 5.40  |        |
| 501: | 2 | 160 | 1 | 0 | - | 1 | 160 | 1 | 1 | 35129.494 | 2. | -1.37 |        |
| 502: | 2 | 160 | 1 | 1 | - | 1 | 160 | 2 | 1 | 35124.539 | 2. | 1.67  | 0.1279 |
| 503: | 2 | 160 | 1 | 1 | - | 1 | 160 | 2 | 2 | 35124.539 | 2. | 1.67  | 0.6197 |
| 504: | 2 | 160 | 1 | 0 | - | 1 | 160 | 2 | 1 | 35124.539 | 2. | 1.67  | 0.2524 |
| 505: | 2 | 160 | 2 | 2 | - | 1 | 160 | 2 | 2 | 35127.281 | 2. | -4.86 | 0.6418 |
| 506: | 2 | 160 | 2 | 1 | - | 1 | 160 | 2 | 1 | 35127.281 | 2. | -4.86 | 0.3582 |
| 507: | 2 | 160 | 3 | 3 | - | 1 | 160 | 3 | 3 | 35131.975 | 2. | -1.49 |        |
| 508: | 2 | 160 | 3 | 2 | - | 1 | 160 | 3 | 2 | 35131.988 | 2. | 2.07  |        |

|      |   |     |   |   |   |   |     |   |   |           |    |       |        |
|------|---|-----|---|---|---|---|-----|---|---|-----------|----|-------|--------|
| 509: | 2 | 160 | 2 | 2 | - | 1 | 160 | 1 | 1 | 35132.215 | 2. | 0.34  |        |
| 510: | 2 | 160 | 2 | 1 | - | 1 | 160 | 1 | 1 | 35132.232 | 2. | -5.23 |        |
| 511: | 2 | 160 | 2 | 1 | - | 1 | 160 | 1 | 0 | 35132.246 | 2. | -0.54 |        |
| 512: | 1 | 161 | 1 | 0 | - | 0 | 161 | 2 | 1 | 17478.050 | 2. | -3.66 |        |
| 513: | 1 | 161 | 1 | 1 | - | 0 | 161 | 2 | 2 | 17478.063 | 2. | 0.03  |        |
| 514: | 1 | 161 | 3 | 3 | - | 0 | 161 | 2 | 2 | 17480.222 | 2. | -0.47 |        |
| 515: | 1 | 161 | 3 | 2 | - | 0 | 161 | 2 | 1 | 17480.240 | 2. | 0.26  |        |
| 516: | 1 | 161 | 2 | 2 | - | 0 | 161 | 2 | 2 | 17482.886 | 2. | -0.92 |        |
| 517: | 1 | 161 | 2 | 1 | - | 0 | 161 | 2 | 1 | 17482.895 | 2. | 0.94  |        |
| 518: | 2 | 161 | 2 | 2 | - | 1 | 161 | 2 | 2 | 34959.217 | 2. | -2.71 | 0.6413 |
| 519: | 2 | 161 | 2 | 1 | - | 1 | 161 | 2 | 1 | 34959.217 | 2. | -2.71 | 0.3587 |
| 520: | 2 | 161 | 3 | 3 | - | 1 | 161 | 2 | 2 | 34961.135 | 2. | -5.76 |        |
| 521: | 2 | 161 | 4 | 4 | - | 1 | 161 | 3 | 3 | 34961.146 | 2. | -2.91 |        |
| 522: | 2 | 161 | 3 | 2 | - | 1 | 161 | 2 | 1 | 34961.164 | 2. | 0.86  | 0.3200 |
| 523: | 2 | 161 | 4 | 3 | - | 1 | 161 | 3 | 2 | 34961.164 | 2. | 0.86  | 0.6800 |
| 524: | 2 | 161 | 1 | 1 | - | 1 | 161 | 1 | 1 | 34961.352 | 2. | -0.07 |        |
| 525: | 2 | 161 | 1 | 1 | - | 1 | 161 | 1 | 0 | 34961.363 | 2. | 1.61  |        |
| 526: | 2 | 161 | 1 | 0 | - | 1 | 161 | 1 | 1 | 34961.375 | 2. | -5.16 |        |
| 527: | 2 | 161 | 3 | 3 | - | 1 | 161 | 3 | 3 | 34963.801 | 2. | -4.21 |        |
| 528: | 2 | 161 | 3 | 2 | - | 1 | 161 | 3 | 2 | 34963.816 | 2. | 1.35  |        |
| 529: | 1 | 162 | 1 | 1 | - | 0 | 162 | 2 | 2 | 17394.059 | 2. | 0.40  |        |
| 530: | 1 | 162 | 3 | 3 | - | 0 | 162 | 2 | 2 | 17396.169 | 2. | -0.49 |        |
| 531: | 1 | 162 | 3 | 2 | - | 0 | 162 | 2 | 1 | 17396.185 | 2. | -1.75 |        |
| 532: | 1 | 162 | 2 | 2 | - | 0 | 162 | 2 | 2 | 17398.771 | 2. | -2.16 |        |
| 533: | 1 | 162 | 2 | 1 | - | 0 | 162 | 2 | 1 | 17398.783 | 2. | 2.70  |        |
| 534: | 1 | 163 | 3 | 3 | - | 0 | 163 | 2 | 2 | 17312.109 | 2. | 2.91  |        |
| 535: | 1 | 163 | 3 | 2 | - | 0 | 163 | 2 | 1 | 17312.120 | 2. | -3.36 |        |

(30)Si(33)S

|      |   |     |   |   |   |   |     |   |   |           |    |       |        |
|------|---|-----|---|---|---|---|-----|---|---|-----------|----|-------|--------|
| 536: | 1 | 165 | 1 | 1 | - | 0 | 165 | 2 | 2 | 17251.393 | 2. | 2.11  |        |
| 537: | 1 | 165 | 3 | 3 | - | 0 | 165 | 2 | 2 | 17253.609 | 2. | 0.30  |        |
| 538: | 1 | 165 | 2 | 2 | - | 0 | 165 | 2 | 2 | 17256.333 | 2. | 2.51  |        |
| 539: | 2 | 165 | 1 | 1 | - | 1 | 165 | 2 | 2 | 34503.213 | 2. | 3.03  |        |
| 540: | 2 | 165 | 2 | 2 | - | 1 | 165 | 2 | 2 | 34505.959 | 2. | 0.15  |        |
| 541: | 2 | 165 | 3 | 3 | - | 1 | 165 | 2 | 2 | 34507.934 | 2. | -2.15 | 0.3445 |
| 542: | 2 | 165 | 4 | 4 | - | 1 | 165 | 3 | 3 | 34507.934 | 2. | -2.15 | 0.6555 |
| 543: | 2 | 165 | 1 | 1 | - | 1 | 165 | 1 | 1 | 34508.152 | 2. | 2.43  |        |
| 544: | 2 | 165 | 2 | 2 | - | 1 | 165 | 3 | 3 | 34508.682 | 2. | 1.35  |        |
| 545: | 2 | 165 | 3 | 3 | - | 1 | 165 | 3 | 3 | 34510.654 | 2. | 0.50  |        |
| 546: | 2 | 165 | 2 | 2 | - | 1 | 165 | 1 | 1 | 34510.896 | 2. | -2.46 |        |
| 547: | 1 | 166 | 1 | 1 | - | 0 | 166 | 2 | 2 | 17169.617 | 2. | -0.08 |        |
| 548: | 1 | 166 | 3 | 3 | - | 0 | 166 | 2 | 2 | 17171.786 | 2. | -0.26 |        |
| 549: | 1 | 166 | 2 | 2 | - | 0 | 166 | 2 | 2 | 17174.448 | 2. | 0.73  |        |
| 550: | 2 | 166 | 2 | 2 | - | 1 | 166 | 2 | 2 | 34342.340 | 2. | 1.83  |        |
| 551: | 2 | 166 | 3 | 3 | - | 1 | 166 | 2 | 2 | 34344.264 | 2. | -3.61 |        |
| 552: | 2 | 166 | 4 | 4 | - | 1 | 166 | 3 | 3 | 34344.273 | 2. | -1.39 |        |
| 553: | 2 | 166 | 3 | 3 | - | 1 | 166 | 3 | 3 | 34346.928 | 2. | -0.62 |        |
| 554: | 2 | 166 | 2 | 2 | - | 1 | 166 | 1 | 1 | 34347.172 | 2. | 3.64  |        |
| 555: | 1 | 167 | 1 | 1 | - | 0 | 167 | 2 | 2 | 17087.835 | 2. | -0.42 |        |
| 556: | 1 | 167 | 3 | 3 | - | 0 | 167 | 2 | 2 | 17089.955 | 2. | -1.42 |        |
| 557: | 1 | 167 | 2 | 2 | - | 0 | 167 | 2 | 2 | 17092.558 | 2. | 0.81  |        |
| 558: | 2 | 167 | 2 | 2 | - | 1 | 167 | 2 | 2 | 34178.699 | 2. | -3.46 |        |
| 559: | 2 | 167 | 3 | 3 | - | 1 | 167 | 2 | 2 | 34180.584 | 2. | -4.88 |        |
| 560: | 2 | 167 | 4 | 4 | - | 1 | 167 | 3 | 3 | 34180.596 | 2. | 0.35  |        |
| 561: | 2 | 167 | 3 | 3 | - | 1 | 167 | 3 | 3 | 34183.186 | 2. | -3.65 |        |

(28)Si(34)S

|      |    |     |    |    |   |    |     |    |    |            |     |       |    |
|------|----|-----|----|----|---|----|-----|----|----|------------|-----|-------|----|
| 562: | 1  | 170 | 1  | 1  | - | 0  | 170 | 0  | 0  | 17657.707  | 2.  | -0.76 | 22 |
| 563: | 2  | 170 | 2  | 2  | - | 1  | 170 | 1  | 1  | 35315.281  | 2.  | 1.00  | 22 |
| 564: | 3  | 170 | 3  | 3  | - | 2  | 170 | 2  | 2  | 52972.575  | 8.  | -6.17 | 17 |
| 565: | 19 | 170 | 19 | 19 | - | 18 | 170 | 18 | 18 | 335341.951 | 10. | 9.07  |    |
| 566: | 20 | 170 | 20 | 20 | - | 19 | 170 | 19 | 19 | 352973.907 | 10. | 8.32  |    |
| 567: | 21 | 170 | 21 | 21 | - | 20 | 170 | 20 | 20 | 370603.151 | 10. | 6.21  |    |
| 568: | 22 | 170 | 22 | 22 | - | 21 | 170 | 21 | 21 | 388229.552 | 10. | 7.29  |    |
| 569: | 23 | 170 | 23 | 23 | - | 22 | 170 | 22 | 22 | 405852.971 | 10. | 8.10  |    |
| 570: | 24 | 170 | 24 | 24 | - | 23 | 170 | 23 | 23 | 423473.269 | 10. | 5.17  |    |
| 571: | 28 | 170 | 28 | 28 | - | 27 | 170 | 27 | 27 | 493920.585 | 10. | 0.87  |    |
| 572: | 29 | 170 | 29 | 29 | - | 28 | 170 | 28 | 28 | 511523.272 | 10. | 6.35  |    |
| 573: | 31 | 170 | 31 | 31 | - | 30 | 170 | 30 | 30 | 546716.701 | 10. | -0.63 |    |
| 574: | 32 | 170 | 32 | 32 | - | 31 | 170 | 31 | 31 | 564307.184 | 10. | -1.01 |    |
| 575: | 33 | 170 | 33 | 33 | - | 32 | 170 | 32 | 32 | 581893.337 | 10. | 5.75  |    |

|      |    |     |    |    |   |    |     |    |    |            |     |        |    |
|------|----|-----|----|----|---|----|-----|----|----|------------|-----|--------|----|
| 576: | 47 | 170 | 47 | 47 | - | 46 | 170 | 46 | 46 | 827568.069 | 30. | -2.90  |    |
| 577: | 48 | 170 | 48 | 48 | - | 47 | 170 | 47 | 47 | 845072.848 | 30. | -47.05 |    |
| 578: | 49 | 170 | 49 | 49 | - | 48 | 170 | 48 | 48 | 862571.222 | 30. | 9.80   |    |
| 579: | 51 | 170 | 51 | 51 | - | 50 | 170 | 50 | 50 | 897547.802 | 30. | 15.72  |    |
| 580: | 1  | 171 | 1  | 1  | - | 0  | 171 | 0  | 0  | 17572.982  | 2.  | 0.37   | 22 |
| 581: | 2  | 171 | 2  | 2  | - | 1  | 171 | 1  | 1  | 35145.826  | 2.  | -1.61  | 22 |
| 582: | 3  | 171 | 3  | 3  | - | 2  | 171 | 2  | 2  | 52718.402  | 30. | -0.27  | 17 |
| 583: | 1  | 172 | 1  | 1  | - | 0  | 172 | 0  | 0  | 17488.247  | 2.  | -0.82  | 22 |
| 584: | 2  | 172 | 2  | 2  | - | 1  | 172 | 1  | 1  | 34976.359  | 2.  | -0.84  | 22 |
| 585: | 1  | 173 | 1  | 1  | - | 0  | 173 | 0  | 0  | 17403.505  | 2.  | 1.42   | 22 |
| 586: | 2  | 173 | 2  | 2  | - | 1  | 173 | 1  | 1  | 34806.871  | 2.  | -0.22  | 22 |
| 587: | 1  | 174 | 1  | 1  | - | 0  | 174 | 0  | 0  | 17318.744  | 2.  | -2.07  | 22 |
| 588: | 2  | 174 | 2  | 2  | - | 1  | 174 | 1  | 1  | 34637.356  | 2.  | -0.06  | 22 |
| 589: | 1  | 175 | 1  | 1  | - | 0  | 175 | 0  | 0  | 17233.972  | 2.  | -0.36  | 22 |
| 590: | 2  | 175 | 2  | 2  | - | 1  | 175 | 1  | 1  | 34467.807  | 2.  | -1.49  | 22 |
| 591: | 1  | 176 | 1  | 1  | - | 0  | 176 | 0  | 0  | 17149.180  | 2.  | 0.58   | 22 |
| 592: | 2  | 176 | 2  | 2  | - | 1  | 176 | 1  | 1  | 34298.221  | 2.  | -1.46  | 22 |
| 593: | 1  | 177 | 1  | 1  | - | 0  | 177 | 0  | 0  | 17064.366  | 2.  | 1.86   | 22 |
| 594: | 2  | 177 | 2  | 2  | - | 1  | 177 | 1  | 1  | 34128.592  | 2.  | 0.25   | 22 |
| 595: | 1  | 178 | 1  | 1  | - | 0  | 178 | 0  | 0  | 16979.524  | 2.  | 0.66   | 22 |
| 596: | 2  | 178 | 2  | 2  | - | 1  | 178 | 1  | 1  | 33958.910  | 2.  | 0.01   | 22 |
| 597: | 1  | 179 | 1  | 1  | - | 0  | 179 | 0  | 0  | 16894.657  | 2.  | 3.23   | 22 |
| 598: | 2  | 179 | 2  | 2  | - | 1  | 179 | 1  | 1  | 33789.172  | 2.  | 1.32   | 22 |
| 599: | 1  | 180 | 1  | 1  | - | 0  | 180 | 0  | 0  | 16809.754  | 2.  | 1.88   | 22 |
| 600: | 2  | 180 | 2  | 2  | - | 1  | 180 | 1  | 1  | 33619.367  | 2.  | -0.19  | 22 |
| 601: | 1  | 181 | 1  | 1  | - | 0  | 181 | 0  | 0  | 16724.816  | 2.  | 1.00   | 22 |
| 602: | 2  | 181 | 2  | 2  | - | 1  | 181 | 1  | 1  | 33449.492  | 2.  | -0.77  | 22 |
| 603: | 1  | 182 | 1  | 1  | - | 0  | 182 | 0  | 0  | 16639.841  | 2.  | 2.02   | 22 |
| 604: | 2  | 182 | 2  | 2  | - | 1  | 182 | 1  | 1  | 33279.539  | 2.  | -1.57  | 22 |
| 605: | 1  | 183 | 1  | 1  | - | 0  | 183 | 0  | 0  | 16554.820  | 2.  | -0.60  | 22 |
| 606: | 2  | 183 | 2  | 2  | - | 1  | 183 | 1  | 1  | 33109.506  | 2.  | 2.39   | 22 |
| 607: | 1  | 184 | 1  | 1  | - | 0  | 184 | 0  | 0  | 16469.758  | 2.  | 1.69   | 22 |
| 608: | 2  | 184 | 2  | 2  | - | 1  | 184 | 1  | 1  | 32939.373  | 2.  | -1.84  | 22 |
| 609: | 1  | 185 | 1  | 1  | - | 0  | 185 | 0  | 0  | 16384.642  | 2.  | -0.55  | 22 |
| 610: | 2  | 185 | 2  | 2  | - | 1  | 185 | 1  | 1  | 32769.147  | 2.  | -0.13  | 22 |
| 611: | 1  | 186 | 1  | 1  | - | 0  | 186 | 0  | 0  | 16299.476  | 2.  | 0.30   | 22 |
| 612: | 2  | 186 | 2  | 2  | - | 1  | 186 | 1  | 1  | 32598.812  | 2.  | -1.23  | 22 |
| 613: | 1  | 187 | 1  | 1  | - | 0  | 187 | 0  | 0  | 16214.252  | 2.  | -0.11  | 22 |
| 614: | 2  | 187 | 2  | 2  | - | 1  | 187 | 1  | 1  | 32428.363  | 2.  | -2.83  | 22 |
| 615: | 1  | 188 | 1  | 1  | - | 0  | 188 | 0  | 0  | 16128.967  | 2.  | -1.07  | 22 |
| 616: | 2  | 188 | 2  | 2  | - | 1  | 188 | 1  | 1  | 32257.796  | 2.  | -1.54  | 22 |
| 617: | 1  | 189 | 1  | 1  | - | 0  | 189 | 0  | 0  | 16043.620  | 2.  | 0.15   | 22 |
| 618: | 2  | 189 | 2  | 2  | - | 1  | 189 | 1  | 1  | 32087.098  | 2.  | -2.88  | 22 |
| 619: | 1  | 190 | 1  | 1  | - | 0  | 190 | 0  | 0  | 15958.202  | 2.  | -1.67  | 22 |
| 620: | 2  | 190 | 2  | 2  | - | 1  | 190 | 1  | 1  | 31916.266  | 2.  | -2.30  | 22 |
| 621: | 1  | 191 | 1  | 1  | - | 0  | 191 | 0  | 0  | 15872.716  | 2.  | 0.28   | 22 |
| 622: | 2  | 191 | 2  | 2  | - | 1  | 191 | 1  | 1  | 31745.291  | 2.  | -1.17  | 22 |
| 623: | 1  | 192 | 1  | 1  | - | 0  | 192 | 0  | 0  | 15787.151  | 2.  | -1.13  | 22 |
| 624: | 2  | 192 | 2  | 2  | - | 1  | 192 | 1  | 1  | 31574.163  | 2.  | -1.76  | 22 |
| 625: | 1  | 193 | 1  | 1  | - | 0  | 193 | 0  | 0  | 15701.509  | 2.  | -0.01  | 22 |
| 626: | 2  | 193 | 2  | 2  | - | 1  | 193 | 1  | 1  | 31402.878  | 2.  | -0.27  | 22 |
| 627: | 1  | 194 | 1  | 1  | - | 0  | 194 | 0  | 0  | 15615.782  | 2.  | -0.39  | 22 |
| 628: | 2  | 194 | 2  | 2  | - | 1  | 194 | 1  | 1  | 31231.423  | 2.  | -1.80  | 22 |
| 629: | 1  | 195 | 1  | 1  | - | 0  | 195 | 0  | 0  | 15529.969  | 2.  | 0.71   | 22 |
| 630: | 2  | 195 | 2  | 2  | - | 1  | 195 | 1  | 1  | 31059.798  | 2.  | 1.65   | 22 |
| 631: | 1  | 196 | 1  | 1  | - | 0  | 196 | 0  | 0  | 15444.065  | 2.  | 2.35   | 22 |
| 632: | 2  | 196 | 2  | 2  | - | 1  | 196 | 1  | 1  | 30887.986  | 2.  | 1.18   | 22 |
| 633: | 1  | 197 | 1  | 1  | - | 0  | 197 | 0  | 0  | 15358.064  | 2.  | 2.63   | 22 |
| 634: | 2  | 197 | 2  | 2  | - | 1  | 197 | 1  | 1  | 30715.982  | 2.  | 0.01   | 22 |
| 635: | 2  | 198 | 2  | 2  | - | 1  | 198 | 1  | 1  | 30543.780  | 2.  | 0.48   | 22 |
| 636: | 2  | 199 | 2  | 2  | - | 1  | 199 | 1  | 1  | 30371.370  | 2.  | 1.07   | 22 |
| 637: | 2  | 200 | 2  | 2  | - | 1  | 200 | 1  | 1  | 30198.744  | 2.  | 2.41   | 22 |
| 638: | 2  | 201 | 2  | 2  | - | 1  | 201 | 1  | 1  | 30025.891  | 2.  | 2.27   | 22 |

(29)Si(34)S

|      |   |     |   |   |   |   |     |   |   |           |    |       |  |
|------|---|-----|---|---|---|---|-----|---|---|-----------|----|-------|--|
| 639: | 1 | 210 | 2 | 2 | - | 0 | 210 | 1 | 1 | 17324.099 | 2. | 0.29  |  |
| 640: | 1 | 210 | 1 | 1 | - | 0 | 210 | 1 | 1 | 17324.120 | 2. | 0.19  |  |
| 641: | 1 | 211 | 2 | 2 | - | 0 | 211 | 1 | 1 | 17241.766 | 2. | 0.75  |  |
| 642: | 1 | 211 | 1 | 1 | - | 0 | 211 | 1 | 1 | 17241.786 | 2. | -0.35 |  |
| 643: | 2 | 211 | 3 | 3 | - | 1 | 211 | 2 | 2 | 34483.404 | 2. | -2.96 |  |
| 644: | 1 | 212 | 2 | 2 | - | 0 | 212 | 1 | 1 | 17159.423 | 2. | -1.43 |  |

|      |   |     |   |   |   |   |     |   |   |           |    |       |
|------|---|-----|---|---|---|---|-----|---|---|-----------|----|-------|
| 645: | 1 | 212 | 1 | 1 | - | 0 | 212 | 1 | 1 | 17159.444 | 2. | -1.53 |
| 646: | 1 | 213 | 2 | 2 | - | 0 | 213 | 1 | 1 | 17077.072 | 2. | -1.64 |
| 647: | 1 | 213 | 1 | 1 | - | 0 | 213 | 1 | 1 | 17077.093 | 2. | -1.74 |
| 648: | 1 | 214 | 2 | 2 | - | 0 | 214 | 1 | 1 | 16994.710 | 2. | -0.17 |
| 649: | 1 | 214 | 1 | 1 | - | 0 | 214 | 1 | 1 | 16994.730 | 2. | -1.27 |
| 650: | 2 | 214 | 3 | 3 | - | 1 | 214 | 2 | 2 | 33989.295 | 2. | -1.41 |
| 651: | 1 | 215 | 2 | 2 | - | 0 | 215 | 1 | 1 | 16912.330 | 2. | -1.23 |
| 652: | 1 | 215 | 1 | 1 | - | 0 | 215 | 1 | 1 | 16912.353 | 2. | 0.67  |
| 653: | 2 | 215 | 3 | 3 | - | 1 | 215 | 2 | 2 | 33824.539 | 2. | 0.61  |
| 654: | 1 | 216 | 2 | 2 | - | 0 | 216 | 1 | 1 | 16829.933 | 2. | -0.94 |
| 655: | 1 | 216 | 1 | 1 | - | 0 | 216 | 1 | 1 | 16829.954 | 2. | -1.04 |
| 656: | 2 | 216 | 3 | 3 | - | 1 | 216 | 2 | 2 | 33659.744 | 2. | 0.35  |
| 657: | 1 | 217 | 2 | 2 | - | 0 | 217 | 1 | 1 | 16747.516 | 2. | 0.67  |
| 658: | 1 | 217 | 1 | 1 | - | 0 | 217 | 1 | 1 | 16747.537 | 2. | 0.57  |
| 659: | 2 | 217 | 3 | 3 | - | 1 | 217 | 2 | 2 | 33494.908 | 2. | 1.71  |
| 660: | 1 | 218 | 2 | 2 | - | 0 | 218 | 1 | 1 | 16665.073 | 2. | 0.62  |
| 661: | 1 | 218 | 1 | 1 | - | 0 | 218 | 1 | 1 | 16665.095 | 2. | 1.52  |
| 662: | 2 | 218 | 3 | 3 | - | 1 | 218 | 2 | 2 | 33330.022 | 2. | 1.77  |
| 663: | 1 | 219 | 2 | 2 | - | 0 | 219 | 1 | 1 | 16582.602 | 2. | 0.01  |
| 664: | 1 | 219 | 1 | 1 | - | 0 | 219 | 1 | 1 | 16582.625 | 2. | 1.91  |
| 665: | 2 | 219 | 3 | 3 | - | 1 | 219 | 2 | 2 | 33165.081 | 2. | 1.71  |
| 666: | 1 | 220 | 2 | 2 | - | 0 | 220 | 1 | 1 | 16500.102 | 2. | 0.99  |
| 667: | 1 | 220 | 1 | 1 | - | 0 | 220 | 1 | 1 | 16500.124 | 2. | 1.90  |

(30)Si(34)S

|      |   |     |   |   |   |   |     |   |   |           |    |       |
|------|---|-----|---|---|---|---|-----|---|---|-----------|----|-------|
| 668: | 1 | 225 | 1 | 1 | - | 0 | 225 | 0 | 0 | 17013.434 | 2. | 2.51  |
| 669: | 2 | 225 | 2 | 2 | - | 1 | 225 | 1 | 1 | 34026.736 | 2. | -1.17 |
| 670: | 1 | 226 | 1 | 1 | - | 0 | 226 | 0 | 0 | 16933.306 | 2. | 0.46  |
| 671: | 2 | 226 | 2 | 2 | - | 1 | 226 | 1 | 1 | 33866.486 | 2. | 0.85  |
| 672: | 1 | 227 | 1 | 1 | - | 0 | 227 | 0 | 0 | 16853.171 | 2. | -1.52 |
| 673: | 2 | 227 | 2 | 2 | - | 1 | 227 | 1 | 1 | 33706.217 | 2. | -2.00 |
| 674: | 1 | 228 | 1 | 1 | - | 0 | 228 | 0 | 0 | 16773.029 | 2. | -0.95 |
| 675: | 2 | 228 | 2 | 2 | - | 1 | 228 | 1 | 1 | 33545.936 | 2. | 2.27  |
| 676: | 1 | 229 | 1 | 1 | - | 0 | 229 | 0 | 0 | 16692.875 | 2. | -0.24 |
| 677: | 2 | 229 | 2 | 2 | - | 1 | 229 | 1 | 1 | 33385.623 | 2. | -1.17 |
| 678: | 1 | 230 | 1 | 1 | - | 0 | 230 | 0 | 0 | 16612.705 | 2. | -0.71 |
| 679: | 2 | 230 | 2 | 2 | - | 1 | 230 | 1 | 1 | 33225.282 | 2. | -2.98 |
| 680: | 1 | 231 | 1 | 1 | - | 0 | 231 | 0 | 0 | 16532.520 | 2. | 1.38  |
| 681: | 2 | 231 | 2 | 2 | - | 1 | 231 | 1 | 1 | 33064.908 | 2. | -2.67 |
| 682: | 1 | 232 | 1 | 1 | - | 0 | 232 | 0 | 0 | 16452.312 | 2. | 0.85  |
| 683: | 2 | 232 | 2 | 2 | - | 1 | 232 | 1 | 1 | 32904.496 | 2. | 0.42  |
| 684: | 1 | 233 | 1 | 1 | - | 0 | 233 | 0 | 0 | 16372.081 | 2. | 0.60  |
| 685: | 1 | 234 | 1 | 1 | - | 0 | 234 | 0 | 0 | 16291.824 | 2. | 0.58  |
| 686: | 2 | 234 | 2 | 2 | - | 1 | 234 | 1 | 1 | 32583.521 | 2. | 1.17  |
| 687: | 1 | 235 | 1 | 1 | - | 0 | 235 | 0 | 0 | 16211.538 | 2. | 0.80  |
| 688: | 2 | 235 | 2 | 2 | - | 1 | 235 | 1 | 1 | 32422.945 | 2. | -2.22 |
| 689: | 1 | 236 | 1 | 1 | - | 0 | 236 | 0 | 0 | 16131.219 | 2. | 0.33  |

(28)Si(36)S

|      |   |     |   |   |   |   |     |   |   |           |    |       |
|------|---|-----|---|---|---|---|-----|---|---|-----------|----|-------|
| 690: | 1 | 240 | 1 | 1 | - | 0 | 240 | 0 | 0 | 17214.975 | 2. | 1.60  |
| 691: | 2 | 240 | 2 | 2 | - | 1 | 240 | 1 | 1 | 34429.816 | 2. | -1.99 |
| 692: | 1 | 241 | 1 | 1 | - | 0 | 241 | 0 | 0 | 17133.419 | 2. | 1.36  |
| 693: | 2 | 241 | 2 | 2 | - | 1 | 241 | 1 | 1 | 34266.707 | 2. | 0.65  |
| 694: | 1 | 242 | 1 | 1 | - | 0 | 242 | 0 | 0 | 17051.855 | 2. | 0.38  |
| 695: | 2 | 242 | 2 | 2 | - | 1 | 242 | 1 | 1 | 34103.576 | 2. | -4.19 |
| 696: | 1 | 243 | 1 | 1 | - | 0 | 243 | 0 | 0 | 16970.282 | 2. | 0.22  |
| 697: | 2 | 243 | 2 | 2 | - | 1 | 243 | 1 | 1 | 33940.432 | 2. | -2.38 |
| 698: | 1 | 244 | 1 | 1 | - | 0 | 244 | 0 | 0 | 16888.697 | 2. | 0.55  |
| 699: | 2 | 244 | 2 | 2 | - | 1 | 244 | 1 | 1 | 33777.266 | 2. | 2.41  |

(29)Si(36)S

|      |   |     |   |   |   |   |     |   |   |           |    |       |
|------|---|-----|---|---|---|---|-----|---|---|-----------|----|-------|
| 700: | 1 | 250 | 2 | 2 | - | 0 | 250 | 1 | 1 | 16881.349 | 2. | 0.74  |
| 701: | 1 | 250 | 1 | 1 | - | 0 | 250 | 1 | 1 | 16881.370 | 2. | 1.18  |
| 702: | 2 | 250 | 3 | 3 | - | 1 | 250 | 2 | 2 | 33762.578 | 2. | -1.52 |
| 703: | 2 | 250 | 2 | 2 | - | 1 | 250 | 1 | 1 | 33762.594 | 2. | 0.77  |

(30)Si(36)S

|      |   |     |   |   |   |   |     |   |   |           |    |      |
|------|---|-----|---|---|---|---|-----|---|---|-----------|----|------|
| 704: | 1 | 255 | 1 | 1 | - | 0 | 255 | 0 | 0 | 16570.667 | 2. | 1.41 |
| 705: | 2 | 255 | 2 | 2 | - | 1 | 255 | 1 | 1 | 33141.213 | 2. | 1.16 |
| 706: | 1 | 256 | 1 | 1 | - | 0 | 256 | 0 | 0 | 16493.652 | 2. | 1.19 |

## INFRARED (ROVIBRATIONAL) DATA

1) from Birk an Jones

(28)Si(32)S

|      |     |   |     |     |   |     |   |     |     |          |      |         |
|------|-----|---|-----|-----|---|-----|---|-----|-----|----------|------|---------|
| 707: | 112 | 1 | 112 | 112 | - | 113 | 0 | 113 | 113 | 658.5159 | -1.0 | -1.8390 |
| 708: | 108 | 1 | 108 | 108 | - | 109 | 0 | 109 | 109 | 662.1280 | -1.0 | -1.0032 |
| 709: | 104 | 1 | 104 | 104 | - | 105 | 0 | 105 | 105 | 665.7000 | -1.0 | -0.9866 |
| 710: | 96  | 1 | 96  | 96  | - | 97  | 0 | 97  | 97  | 672.7263 | -1.0 | 0.2670  |
| 711: | 93  | 1 | 93  | 93  | - | 94  | 0 | 94  | 94  | 675.3191 | -1.0 | -0.0966 |
| 712: | 92  | 1 | 92  | 92  | - | 93  | 0 | 93  | 93  | 676.1785 | -1.0 | -0.0528 |
| 713: | 88  | 1 | 88  | 88  | - | 89  | 0 | 89  | 89  | 679.5896 | -1.0 | -1.1052 |
| 714: | 84  | 1 | 84  | 84  | - | 85  | 0 | 85  | 85  | 682.9613 | -1.0 | -0.9143 |
| 715: | 80  | 1 | 80  | 80  | - | 81  | 0 | 81  | 81  | 686.2922 | -1.0 | -0.6026 |
| 716: | 79  | 1 | 79  | 79  | - | 80  | 0 | 80  | 80  | 687.1193 | -1.0 | 0.2769  |
| 717: | 66  | 1 | 66  | 66  | - | 67  | 0 | 67  | 67  | 697.6230 | -1.0 | -0.5673 |
| 718: | 62  | 1 | 62  | 62  | - | 63  | 0 | 63  | 63  | 700.7666 | -1.0 | 0.0635  |
| 719: | 58  | 1 | 58  | 58  | - | 59  | 0 | 59  | 59  | 703.8670 | -1.0 | -0.0314 |
| 720: | 53  | 1 | 53  | 53  | - | 54  | 0 | 54  | 54  | 707.6826 | -1.0 | 0.1170  |
| 721: | 48  | 1 | 48  | 48  | - | 49  | 0 | 49  | 49  | 711.4291 | -1.0 | -1.4560 |
| 722: | 43  | 1 | 43  | 43  | - | 44  | 0 | 44  | 44  | 715.1110 | -1.0 | 0.3166  |
| 723: | 38  | 1 | 38  | 38  | - | 39  | 0 | 39  | 39  | 718.7220 | -1.0 | -0.2951 |
| 724: | 33  | 1 | 33  | 33  | - | 34  | 0 | 34  | 34  | 722.2635 | -1.0 | -1.3176 |
| 725: | 28  | 1 | 28  | 28  | - | 29  | 0 | 29  | 29  | 725.7391 | -1.0 | 1.4254  |
| 726: | 23  | 1 | 23  | 23  | - | 24  | 0 | 24  | 24  | 729.1404 | -1.0 | 0.1133  |
| 727: | 22  | 1 | 22  | 22  | - | 23  | 0 | 23  | 23  | 729.8124 | -1.0 | 0.0714  |
| 728: | 18  | 1 | 18  | 18  | - | 19  | 0 | 19  | 19  | 732.4724 | -1.0 | 0.3284  |
| 729: | 17  | 1 | 17  | 17  | - | 18  | 0 | 18  | 18  | 733.1295 | -1.0 | -0.3778 |
| 730: | 16  | 1 | 16  | 16  | - | 17  | 0 | 17  | 17  | 733.7851 | -1.0 | 0.2771  |
| 731: | 13  | 1 | 13  | 13  | - | 14  | 0 | 14  | 14  | 735.7316 | -1.0 | -0.8439 |
| 732: | 12  | 1 | 12  | 12  | - | 13  | 0 | 13  | 13  | 736.3750 | -1.0 | -0.8971 |
| 733: | 11  | 1 | 11  | 11  | - | 12  | 0 | 12  | 12  | 737.0162 | -1.0 | -0.2656 |
| 734: | 6   | 1 | 6   | 6   | - | 7   | 0 | 7   | 7   | 740.1769 | -1.0 | 1.0285  |
| 735: | 5   | 1 | 5   | 5   | - | 4   | 0 | 4   | 4   | 747.4594 | -1.0 | -0.7693 |
| 736: | 6   | 1 | 6   | 6   | - | 5   | 0 | 5   | 5   | 748.0476 | -1.0 | -0.4002 |
| 737: | 25  | 1 | 25  | 25  | - | 24  | 0 | 24  | 24  | 758.6454 | -1.0 | -0.5748 |
| 738: | 26  | 1 | 26  | 26  | - | 25  | 0 | 25  | 25  | 759.1723 | -1.0 | -1.0804 |
| 739: | 27  | 1 | 27  | 27  | - | 26  | 0 | 26  | 26  | 759.6975 | -1.0 | -0.2137 |
| 740: | 28  | 1 | 28  | 28  | - | 27  | 0 | 27  | 27  | 760.2184 | -1.0 | -0.5696 |
| 741: | 35  | 1 | 35  | 35  | - | 34  | 0 | 34  | 34  | 763.7810 | -1.0 | -0.1836 |
| 742: | 36  | 1 | 36  | 36  | - | 35  | 0 | 35  | 35  | 764.2770 | -1.0 | -0.6440 |
| 743: | 43  | 1 | 43  | 43  | - | 42  | 0 | 42  | 42  | 767.6656 | -1.0 | 0.4183  |
| 744: | 94  | 1 | 94  | 94  | - | 93  | 0 | 93  | 93  | 787.5667 | -1.0 | -1.0475 |
| 745: | 95  | 1 | 95  | 95  | - | 94  | 0 | 94  | 94  | 787.8708 | -1.0 | -0.5812 |
| 746: | 96  | 1 | 96  | 96  | - | 95  | 0 | 95  | 95  | 788.1716 | -1.0 | 0.0083  |
| 747: | 107 | 2 | 107 | 107 | - | 108 | 1 | 108 | 108 | 658.1773 | -1.0 | -1.7845 |
| 748: | 106 | 2 | 106 | 106 | - | 107 | 1 | 107 | 107 | 659.0699 | -1.0 | -0.5046 |
| 749: | 99  | 2 | 99  | 99  | - | 100 | 1 | 100 | 100 | 665.2391 | -1.0 | -1.3134 |
| 750: | 91  | 2 | 91  | 91  | - | 92  | 1 | 92  | 92  | 672.1414 | -1.0 | -0.7459 |
| 751: | 87  | 2 | 87  | 87  | - | 88  | 1 | 88  | 88  | 675.5317 | -1.0 | -0.7818 |
| 752: | 86  | 2 | 86  | 86  | - | 87  | 1 | 87  | 87  | 676.3730 | -1.0 | -0.7139 |
| 753: | 82  | 2 | 82  | 82  | - | 83  | 1 | 83  | 83  | 679.7124 | -1.0 | -0.7058 |
| 754: | 78  | 2 | 78  | 78  | - | 79  | 1 | 79  | 79  | 683.0125 | -1.0 | 1.0699  |
| 755: | 74  | 2 | 74  | 74  | - | 75  | 1 | 75  | 75  | 686.2688 | -1.0 | 0.3925  |
| 756: | 73  | 2 | 73  | 73  | - | 74  | 1 | 74  | 74  | 687.0759 | -1.0 | -0.2585 |
| 757: | 60  | 2 | 60  | 60  | - | 61  | 1 | 61  | 61  | 697.3382 | -1.0 | 0.0466  |
| 758: | 56  | 2 | 56  | 56  | - | 57  | 1 | 57  | 57  | 700.4054 | -1.0 | -0.1726 |
| 759: | 55  | 2 | 55  | 55  | - | 56  | 1 | 56  | 56  | 701.1672 | -1.0 | 1.4661  |
| 760: | 51  | 2 | 51  | 51  | - | 52  | 1 | 52  | 52  | 704.1798 | -1.0 | 0.3296  |
| 761: | 46  | 2 | 46  | 46  | - | 47  | 1 | 47  | 47  | 707.8868 | -1.0 | 1.0433  |
| 762: | 41  | 2 | 41  | 41  | - | 42  | 1 | 42  | 42  | 711.5233 | -1.0 | -0.5636 |
| 763: | 36  | 2 | 36  | 36  | - | 37  | 1 | 37  | 37  | 715.0928 | -1.0 | -0.4200 |
| 764: | 31  | 2 | 31  | 31  | - | 32  | 1 | 32  | 32  | 718.5935 | -1.0 | 0.2484  |
| 765: | 26  | 2 | 26  | 26  | - | 27  | 1 | 27  | 27  | 722.0226 | -1.0 | -0.7810 |
| 766: | 21  | 2 | 21  | 21  | - | 22  | 1 | 22  | 22  | 725.3840 | -1.0 | 0.9724  |
| 767: | 20  | 2 | 20  | 20  | - | 21  | 1 | 21  | 21  | 726.0486 | -1.0 | 2.1523  |
| 768: | 15  | 2 | 15  | 15  | - | 16  | 1 | 16  | 16  | 729.3202 | -1.0 | -0.5444 |
| 769: | 14  | 2 | 14  | 14  | - | 15  | 1 | 15  | 15  | 729.9668 | -1.0 | -0.2101 |
| 770: | 10  | 2 | 10  | 10  | - | 11  | 1 | 11  | 11  | 732.5215 | -1.0 | -1.7704 |
| 771: | 9   | 2 | 9   | 9   | - | 10  | 1 | 10  | 10  | 733.1548 | -1.0 | -0.3112 |
| 772: | 4   | 2 | 4   | 4   | - | 5   | 1 | 5   | 5   | 736.2702 | -1.0 | -0.5331 |
| 773: | 3   | 2 | 3   | 3   | - | 4   | 1 | 4   | 4   | 736.8842 | -1.0 | -0.9078 |

|      |     |   |     |     |   |     |   |     |          |      |         |
|------|-----|---|-----|-----|---|-----|---|-----|----------|------|---------|
| 774: | 2   | 2 | 2   | 2   | - | 1   | 1 | 1   | 740.5097 | -1.0 | -0.0073 |
| 775: | 14  | 2 | 14  | 14  | - | 13  | 1 | 13  | 747.4385 | -1.0 | -0.0780 |
| 776: | 15  | 2 | 15  | 15  | - | 14  | 1 | 14  | 747.9967 | -1.0 | 0.1935  |
| 777: | 16  | 2 | 16  | 16  | - | 15  | 1 | 15  | 748.5518 | -1.0 | 0.3841  |
| 778: | 35  | 2 | 35  | 35  | - | 34  | 1 | 34  | 758.5135 | -1.0 | -1.0669 |
| 779: | 36  | 2 | 36  | 36  | - | 35  | 1 | 35  | 759.0070 | -1.0 | -1.0665 |
| 780: | 38  | 2 | 38  | 38  | - | 37  | 1 | 37  | 759.9870 | -1.0 | 1.3058  |
| 781: | 46  | 2 | 46  | 46  | - | 45  | 1 | 45  | 763.7698 | -1.0 | -0.7193 |
| 782: | 47  | 2 | 47  | 47  | - | 46  | 1 | 46  | 764.2287 | -1.0 | -0.7004 |
| 783: | 54  | 2 | 54  | 54  | - | 53  | 1 | 53  | 767.3521 | -1.0 | -0.2267 |
| 784: | 55  | 2 | 55  | 55  | - | 54  | 1 | 54  | 767.7855 | -1.0 | -0.1497 |
| 785: | 56  | 2 | 56  | 56  | - | 55  | 1 | 55  | 768.2153 | -1.0 | -0.4553 |
| 786: | 86  | 2 | 86  | 86  | - | 85  | 1 | 85  | 779.5968 | -1.0 | -0.6551 |
| 787: | 114 | 2 | 114 | 114 | - | 113 | 1 | 113 | 787.4800 | -1.0 | -0.4761 |
| 788: | 115 | 2 | 115 | 115 | - | 114 | 1 | 114 | 787.7103 | -1.0 | -1.2743 |
| 789: | 116 | 2 | 116 | 116 | - | 115 | 1 | 115 | 787.9384 | -1.0 | -0.7399 |
| 790: | 117 | 2 | 117 | 117 | - | 116 | 1 | 116 | 788.1633 | -1.0 | 0.1325  |
| 791: | 101 | 3 | 101 | 101 | - | 102 | 2 | 102 | 658.6302 | -1.0 | -1.0976 |
| 792: | 97  | 3 | 97  | 97  | - | 98  | 2 | 98  | 662.1093 | -1.0 | -1.3083 |
| 793: | 93  | 3 | 93  | 93  | - | 94  | 2 | 94  | 665.5490 | -1.0 | -0.8734 |
| 794: | 85  | 3 | 85  | 85  | - | 86  | 2 | 86  | 672.3070 | -1.0 | -0.1752 |
| 795: | 81  | 3 | 81  | 81  | - | 82  | 2 | 82  | 675.6244 | -1.0 | -0.2618 |
| 796: | 80  | 3 | 80  | 80  | - | 81  | 2 | 81  | 676.4482 | -1.0 | 0.5847  |
| 797: | 76  | 3 | 76  | 76  | - | 77  | 2 | 77  | 679.7124 | -1.0 | -1.2261 |
| 798: | 72  | 3 | 72  | 72  | - | 73  | 2 | 73  | 682.9385 | -1.0 | 0.3582  |
| 799: | 68  | 3 | 68  | 68  | - | 69  | 2 | 69  | 686.1202 | -1.0 | -0.6814 |
| 800: | 67  | 3 | 67  | 67  | - | 68  | 2 | 68  | 686.9107 | -1.0 | 0.6943  |
| 801: | 58  | 3 | 58  | 58  | - | 59  | 2 | 59  | 693.8928 | -1.0 | -0.3005 |
| 802: | 53  | 3 | 53  | 53  | - | 54  | 2 | 54  | 697.6791 | -1.0 | -0.1420 |
| 803: | 49  | 3 | 49  | 49  | - | 50  | 2 | 50  | 700.6601 | -1.0 | 0.4416  |
| 804: | 44  | 3 | 44  | 44  | - | 45  | 2 | 45  | 704.3245 | -1.0 | 0.4173  |
| 805: | 39  | 3 | 39  | 39  | - | 40  | 2 | 40  | 707.9212 | -1.0 | 1.1086  |
| 806: | 34  | 3 | 34  | 34  | - | 35  | 2 | 35  | 711.4464 | -1.0 | -0.7123 |
| 807: | 18  | 3 | 18  | 18  | - | 19  | 2 | 19  | 722.2635 | -1.0 | 0.2408  |
| 808: | 13  | 3 | 13  | 13  | - | 14  | 2 | 14  | 725.4955 | -1.0 | 1.2886  |
| 809: | 12  | 3 | 12  | 12  | - | 13  | 2 | 13  | 726.1328 | -1.0 | 1.0210  |
| 810: | 7   | 3 | 7   | 7   | - | 8   | 2 | 8   | 729.2757 | -1.0 | -0.5429 |
| 811: | 6   | 3 | 6   | 6   | - | 7   | 2 | 7   | 729.8961 | -1.0 | -0.3277 |
| 812: | 2   | 3 | 2   | 2   | - | 3   | 2 | 3   | 732.3462 | -1.0 | -1.7820 |
| 813: | 1   | 3 | 1   | 1   | - | 2   | 2 | 2   | 732.9538 | -1.0 | 0.2496  |
| 814: | 0   | 3 | 0   | 0   | - | 1   | 2 | 1   | 733.5564 | -1.0 | 0.2187  |
| 815: | 4   | 3 | 4   | 4   | - | 3   | 2 | 3   | 736.5246 | -1.0 | -0.5043 |
| 816: | 5   | 3 | 5   | 5   | - | 4   | 2 | 4   | 737.1094 | -1.0 | -0.6090 |
| 817: | 11  | 3 | 11  | 11  | - | 10  | 2 | 10  | 740.5572 | -1.0 | 0.3261  |
| 818: | 24  | 3 | 24  | 24  | - | 23  | 2 | 23  | 747.6526 | -1.0 | -0.5583 |
| 819: | 25  | 3 | 25  | 25  | - | 24  | 2 | 24  | 748.1772 | -1.0 | -0.5183 |
| 820: | 46  | 3 | 46  | 46  | - | 45  | 2 | 45  | 758.4767 | -1.0 | -0.3406 |
| 821: | 47  | 3 | 47  | 47  | - | 46  | 2 | 46  | 758.9322 | -1.0 | -0.7492 |
| 822: | 49  | 3 | 49  | 49  | - | 48  | 2 | 48  | 759.8347 | -1.0 | -0.5274 |
| 823: | 58  | 3 | 58  | 58  | - | 57  | 2 | 57  | 763.7360 | -1.0 | -1.0876 |
| 824: | 59  | 3 | 59  | 59  | - | 58  | 2 | 58  | 764.1538 | -1.0 | -0.7271 |
| 825: | 67  | 3 | 67  | 67  | - | 66  | 2 | 66  | 767.3775 | -1.0 | 0.4825  |
| 826: | 68  | 3 | 68  | 68  | - | 67  | 2 | 67  | 767.7649 | -1.0 | -0.2238 |
| 827: | 69  | 3 | 69  | 69  | - | 68  | 2 | 68  | 768.1500 | -1.0 | 0.0549  |
| 828: | 104 | 3 | 104 | 104 | - | 103 | 2 | 103 | 779.5086 | -1.0 | -0.0591 |
| 829: | 147 | 3 | 147 | 147 | - | 146 | 2 | 146 | 787.6061 | -2.0 | -4.2727 |
| 830: | 149 | 3 | 149 | 149 | - | 148 | 2 | 148 | 787.8213 | -2.0 | -2.2116 |
| 831: | 150 | 3 | 150 | 150 | - | 149 | 2 | 149 | 787.9220 | -2.0 | -2.4938 |
| 832: | 96  | 4 | 96  | 96  | - | 97  | 3 | 97  | 658.1042 | -1.0 | -2.0826 |
| 833: | 95  | 4 | 95  | 95  | - | 96  | 3 | 96  | 658.9639 | -1.0 | -0.5567 |
| 834: | 87  | 4 | 87  | 87  | - | 88  | 3 | 88  | 665.7385 | -1.0 | -0.5566 |
| 835: | 79  | 4 | 79  | 79  | - | 80  | 3 | 80  | 672.3506 | -1.0 | -0.0914 |
| 836: | 75  | 4 | 75  | 75  | - | 76  | 3 | 76  | 675.5941 | -1.0 | -0.6055 |
| 837: | 74  | 4 | 74  | 74  | - | 75  | 3 | 75  | 676.3990 | -1.0 | -0.2239 |
| 838: | 70  | 4 | 70  | 70  | - | 71  | 3 | 71  | 679.5896 | -1.0 | -1.6261 |
| 839: | 66  | 4 | 66  | 66  | - | 67  | 3 | 67  | 682.7408 | -1.0 | -0.5023 |
| 840: | 62  | 4 | 62  | 62  | - | 63  | 3 | 63  | 685.8499 | -1.0 | 0.7306  |
| 841: | 61  | 4 | 61  | 61  | - | 62  | 3 | 62  | 686.6194 | -1.0 | -0.1077 |
| 842: | 60  | 4 | 60  | 60  | - | 61  | 3 | 61  | 687.3875 | -1.0 | 0.3143  |
| 843: | 47  | 4 | 47  | 47  | - | 48  | 3 | 48  | 697.1230 | -1.0 | 0.1296  |
| 844: | 46  | 4 | 46  | 46  | - | 47  | 3 | 47  | 697.8525 | -1.0 | -0.3323 |

|      |     |   |     |     |   |     |   |     |     |          |      |         |
|------|-----|---|-----|-----|---|-----|---|-----|-----|----------|------|---------|
| 845: | 42  | 4 | 42  | 42  | - | 43  | 3 | 43  | 43  | 700.7459 | -1.0 | 0.5449  |
| 846: | 37  | 4 | 37  | 37  | - | 38  | 3 | 38  | 38  | 704.2998 | -1.0 | 0.6147  |
| 847: | 32  | 4 | 32  | 32  | - | 33  | 3 | 33  | 33  | 707.7842 | -1.0 | 0.4121  |
| 848: | 21  | 4 | 21  | 21  | - | 22  | 3 | 22  | 22  | 715.2036 | -1.0 | 0.2140  |
| 849: | 10  | 4 | 10  | 10  | - | 11  | 3 | 11  | 11  | 722.2781 | -1.0 | -0.8318 |
| 850: | 4   | 4 | 4   | 4   | - | 5   | 3 | 5   | 5   | 725.9923 | -1.0 | 1.2329  |
| 851: | 1   | 4 | 1   | 1   | - | 0   | 3 | 0   | 0   | 729.5967 | -1.0 | -1.2481 |
| 852: | 6   | 4 | 6   | 6   | - | 5   | 3 | 5   | 5   | 732.5215 | -1.0 | -1.0341 |
| 853: | 7   | 4 | 7   | 7   | - | 6   | 3 | 6   | 6   | 733.0976 | -1.0 | -0.9411 |
| 854: | 8   | 4 | 8   | 8   | - | 7   | 3 | 7   | 7   | 733.6720 | -1.0 | 0.4333  |
| 855: | 12  | 4 | 12  | 12  | - | 11  | 3 | 11  | 11  | 735.9330 | -1.0 | -0.7592 |
| 856: | 13  | 4 | 13  | 13  | - | 12  | 3 | 12  | 12  | 736.4910 | -1.0 | -0.8056 |
| 857: | 14  | 4 | 14  | 14  | - | 13  | 3 | 13  | 13  | 737.0458 | -1.0 | -1.0416 |
| 858: | 20  | 4 | 20  | 20  | - | 19  | 3 | 19  | 19  | 740.3144 | -1.0 | 0.8343  |
| 859: | 21  | 4 | 21  | 21  | - | 20  | 3 | 20  | 20  | 740.8471 | -1.0 | -0.2922 |
| 860: | 34  | 4 | 34  | 34  | - | 33  | 3 | 33  | 33  | 747.5076 | -1.0 | -0.2410 |
| 861: | 35  | 4 | 35  | 35  | - | 34  | 3 | 34  | 34  | 747.9967 | -1.0 | -1.8260 |
| 862: | 36  | 4 | 36  | 36  | - | 35  | 3 | 35  | 35  | 748.4860 | -1.0 | -0.0924 |
| 863: | 58  | 4 | 58  | 58  | - | 57  | 3 | 57  | 57  | 758.4146 | -1.0 | 1.2234  |
| 864: | 59  | 4 | 59  | 59  | - | 58  | 3 | 58  | 58  | 758.8272 | -1.0 | -0.6261 |
| 865: | 61  | 4 | 61  | 61  | - | 60  | 3 | 60  | 60  | 759.6459 | -1.0 | -1.1005 |
| 866: | 62  | 4 | 62  | 62  | - | 61  | 3 | 61  | 61  | 760.0502 | -1.0 | -1.5151 |
| 867: | 72  | 4 | 72  | 72  | - | 71  | 3 | 71  | 71  | 763.9180 | -1.0 | -0.9716 |
| 868: | 73  | 4 | 73  | 73  | - | 72  | 3 | 72  | 72  | 764.2875 | -1.0 | -0.0946 |
| 869: | 82  | 4 | 82  | 82  | - | 81  | 3 | 81  | 81  | 767.4562 | -1.0 | 0.6721  |
| 870: | 84  | 4 | 84  | 84  | - | 83  | 3 | 83  | 83  | 768.1232 | -1.0 | 0.5043  |
| 871: | 90  | 5 | 90  | 90  | - | 91  | 4 | 91  | 91  | 658.3347 | -1.0 | -2.7115 |
| 872: | 89  | 5 | 89  | 89  | - | 90  | 4 | 90  | 90  | 659.1781 | -1.0 | 0.5468  |
| 873: | 81  | 5 | 81  | 81  | - | 82  | 4 | 82  | 82  | 665.8061 | -1.0 | -0.8404 |
| 874: | 73  | 5 | 73  | 73  | - | 74  | 4 | 74  | 74  | 672.2717 | -1.0 | 0.0428  |
| 875: | 69  | 5 | 69  | 69  | - | 70  | 4 | 70  | 70  | 675.4412 | -1.0 | -0.3678 |
| 876: | 68  | 5 | 68  | 68  | - | 69  | 4 | 69  | 69  | 676.2266 | -1.0 | -0.8929 |
| 877: | 55  | 5 | 55  | 55  | - | 56  | 4 | 56  | 56  | 686.2019 | -1.0 | -1.6906 |
| 878: | 54  | 5 | 54  | 54  | - | 55  | 4 | 55  | 55  | 686.9535 | -1.0 | 1.2063  |
| 879: | 40  | 5 | 40  | 40  | - | 41  | 4 | 41  | 41  | 697.1493 | -1.0 | -0.0938 |
| 880: | 39  | 5 | 39  | 39  | - | 40  | 4 | 40  | 40  | 697.8563 | -1.0 | -0.9376 |
| 881: | 35  | 5 | 35  | 35  | - | 36  | 4 | 36  | 36  | 700.6601 | -1.0 | -0.8626 |
| 882: | 30  | 5 | 30  | 30  | - | 31  | 4 | 31  | 31  | 704.1036 | -1.0 | 0.5391  |
| 883: | 19  | 5 | 19  | 19  | - | 20  | 4 | 20  | 20  | 711.4291 | -1.0 | 0.8112  |
| 884: | 13  | 5 | 13  | 13  | - | 14  | 4 | 14  | 14  | 715.2788 | -1.0 | 0.0506  |
| 885: | 2   | 5 | 2   | 2   | - | 3   | 4 | 3   | 3   | 722.0665 | -1.0 | -1.2657 |
| 886: | 1   | 5 | 1   | 1   | - | 2   | 4 | 2   | 2   | 722.6663 | -1.0 | -1.1415 |
| 887: | 3   | 5 | 3   | 3   | - | 2   | 4 | 2   | 2   | 725.6235 | -1.0 | 1.8550  |
| 888: | 4   | 5 | 4   | 4   | - | 3   | 4 | 3   | 3   | 726.2052 | -1.0 | 1.5829  |
| 889: | 10  | 5 | 10  | 10  | - | 9   | 4 | 9   | 9   | 729.6323 | -1.0 | -0.6636 |
| 890: | 15  | 5 | 15  | 15  | - | 14  | 4 | 14  | 14  | 732.4064 | -1.0 | -1.9931 |
| 891: | 16  | 5 | 16  | 16  | - | 15  | 4 | 15  | 15  | 732.9538 | -1.0 | -0.6360 |
| 892: | 17  | 5 | 17  | 17  | - | 16  | 4 | 16  | 16  | 733.4983 | -1.0 | 0.8469  |
| 893: | 22  | 5 | 22  | 22  | - | 21  | 4 | 21  | 21  | 736.1670 | -1.0 | 0.0180  |
| 894: | 23  | 5 | 23  | 23  | - | 22  | 4 | 22  | 22  | 736.6911 | -1.0 | -0.6420 |
| 895: | 24  | 5 | 24  | 24  | - | 23  | 4 | 23  | 23  | 737.2133 | -1.0 | -0.1419 |
| 896: | 30  | 5 | 30  | 30  | - | 29  | 4 | 29  | 29  | 740.2799 | -1.0 | 0.7960  |
| 897: | 45  | 5 | 45  | 45  | - | 44  | 4 | 44  | 44  | 747.4544 | -1.0 | 0.9103  |
| 898: | 46  | 5 | 46  | 46  | - | 45  | 4 | 45  | 45  | 747.9063 | -1.0 | -0.3116 |
| 899: | 47  | 5 | 47  | 47  | - | 46  | 4 | 46  | 46  | 748.3564 | -1.0 | -0.1587 |
| 900: | 72  | 5 | 72  | 72  | - | 71  | 4 | 71  | 71  | 758.5577 | -1.0 | -0.8070 |
| 901: | 73  | 5 | 73  | 73  | - | 72  | 4 | 72  | 72  | 758.9238 | -1.0 | -0.3145 |
| 902: | 76  | 5 | 76  | 76  | - | 75  | 4 | 75  | 75  | 759.9998 | -1.0 | -1.2342 |
| 903: | 87  | 5 | 87  | 87  | - | 86  | 4 | 86  | 86  | 763.6913 | -1.0 | -0.9993 |
| 904: | 88  | 5 | 88  | 88  | - | 87  | 4 | 87  | 87  | 764.0074 | -1.0 | -0.2500 |
| 905: | 89  | 5 | 89  | 89  | - | 88  | 4 | 88  | 88  | 764.3192 | -1.0 | -0.4079 |
| 906: | 100 | 5 | 100 | 100 | - | 99  | 4 | 99  | 99  | 767.5251 | -1.0 | -0.5874 |
| 907: | 102 | 5 | 102 | 102 | - | 101 | 4 | 101 | 101 | 768.0635 | -1.0 | -0.3759 |
| 908: | 84  | 6 | 84  | 84  | - | 85  | 5 | 85  | 85  | 658.4463 | -1.0 | -1.3121 |
| 909: | 83  | 6 | 83  | 83  | - | 84  | 5 | 84  | 84  | 659.2697 | -1.0 | 0.1342  |
| 910: | 75  | 6 | 75  | 75  | - | 76  | 5 | 76  | 76  | 665.7514 | -1.0 | -1.0878 |
| 911: | 57  | 6 | 57  | 57  | - | 58  | 5 | 58  | 58  | 679.7260 | -1.0 | -1.2684 |
| 912: | 53  | 6 | 53  | 53  | - | 54  | 5 | 54  | 54  | 682.7156 | -1.0 | -0.1936 |
| 913: | 48  | 6 | 48  | 48  | - | 49  | 5 | 49  | 49  | 686.3903 | -1.0 | -0.4244 |
| 914: | 32  | 6 | 32  | 32  | - | 33  | 5 | 33  | 33  | 697.6906 | -1.0 | -0.1352 |
| 915: | 28  | 6 | 28  | 28  | - | 29  | 5 | 29  | 29  | 700.4055 | -1.0 | 0.7565  |

|      |     |   |     |     |   |     |   |     |     |          |      |         |
|------|-----|---|-----|-----|---|-----|---|-----|-----|----------|------|---------|
| 916: | 27  | 6 | 27  | 27  | - | 28  | 5 | 28  | 28  | 701.0780 | -1.0 | 1.7723  |
| 917: | 17  | 6 | 17  | 17  | - | 18  | 5 | 18  | 18  | 707.6352 | -1.0 | -0.1942 |
| 918: | 6   | 6 | 6   | 6   | - | 5   | 5 | 5   | 5   | 722.1988 | -1.0 | -1.3383 |
| 919: | 12  | 6 | 12  | 12  | - | 11  | 5 | 11  | 11  | 725.5779 | -1.0 | 1.9866  |
| 920: | 19  | 6 | 19  | 19  | - | 18  | 5 | 18  | 18  | 729.3771 | -1.0 | -0.3255 |
| 921: | 20  | 6 | 20  | 20  | - | 19  | 5 | 19  | 19  | 729.9081 | -1.0 | -0.2729 |
| 922: | 25  | 6 | 25  | 25  | - | 24  | 5 | 24  | 24  | 732.5171 | -1.0 | -0.2198 |
| 923: | 26  | 6 | 26  | 26  | - | 25  | 5 | 25  | 25  | 733.0296 | -1.0 | -0.3165 |
| 924: | 27  | 6 | 27  | 27  | - | 26  | 5 | 26  | 26  | 733.5401 | -1.0 | 0.6625  |
| 925: | 32  | 6 | 32  | 32  | - | 31  | 5 | 31  | 31  | 736.0401 | -1.0 | -0.6324 |
| 926: | 33  | 6 | 33  | 33  | - | 32  | 5 | 32  | 32  | 736.5307 | -1.0 | -0.9946 |
| 927: | 41  | 6 | 41  | 41  | - | 40  | 5 | 40  | 40  | 740.3475 | -1.0 | 0.5082  |
| 928: | 57  | 6 | 57  | 57  | - | 56  | 5 | 56  | 56  | 747.3697 | -1.0 | -0.3544 |
| 929: | 58  | 6 | 58  | 58  | - | 57  | 5 | 57  | 57  | 747.7810 | -1.0 | -0.7401 |
| 930: | 59  | 6 | 59  | 59  | - | 58  | 5 | 58  | 58  | 748.1903 | -1.0 | 0.1114  |
| 931: | 60  | 6 | 60  | 60  | - | 59  | 5 | 59  | 59  | 748.5948 | -1.0 | -0.5946 |
| 932: | 88  | 6 | 88  | 88  | - | 87  | 5 | 87  | 87  | 758.6029 | -1.0 | -0.7236 |
| 933: | 89  | 6 | 89  | 89  | - | 88  | 5 | 88  | 88  | 758.9117 | -1.0 | -0.8291 |
| 934: | 92  | 6 | 92  | 92  | - | 91  | 5 | 91  | 91  | 759.8180 | -1.0 | -0.8235 |
| 935: | 107 | 6 | 107 | 107 | - | 106 | 5 | 106 | 106 | 763.8852 | -1.0 | -0.9803 |
| 936: | 108 | 6 | 108 | 108 | - | 107 | 5 | 107 | 107 | 764.1284 | -1.0 | -1.1586 |
| 937: | 127 | 6 | 127 | 127 | - | 126 | 5 | 126 | 126 | 768.0828 | -1.0 | 1.0468  |
| 938: | 78  | 7 | 78  | 78  | - | 79  | 6 | 79  | 79  | 658.4342 | -1.0 | -1.6493 |
| 939: | 77  | 7 | 77  | 77  | - | 78  | 6 | 78  | 78  | 659.2400 | -1.0 | 0.5426  |
| 940: | 69  | 7 | 69  | 69  | - | 70  | 6 | 70  | 70  | 665.5739 | -1.0 | -0.7447 |
| 941: | 60  | 7 | 60  | 60  | - | 61  | 6 | 61  | 61  | 672.5004 | -1.0 | -0.2531 |
| 942: | 56  | 7 | 56  | 56  | - | 57  | 6 | 57  | 57  | 675.5090 | -1.0 | -0.7345 |
| 943: | 55  | 7 | 55  | 55  | - | 56  | 6 | 56  | 56  | 676.2555 | -1.0 | 0.1957  |
| 944: | 50  | 7 | 50  | 50  | - | 51  | 6 | 51  | 51  | 679.9418 | -1.0 | -0.9261 |
| 945: | 46  | 7 | 46  | 46  | - | 47  | 6 | 47  | 47  | 682.8433 | -1.0 | -0.5802 |
| 946: | 41  | 7 | 41  | 41  | - | 42  | 6 | 42  | 42  | 686.4083 | -1.0 | -0.5681 |
| 947: | 25  | 7 | 25  | 25  | - | 26  | 6 | 26  | 26  | 697.3526 | -1.0 | 1.0378  |
| 948: | 20  | 7 | 20  | 20  | - | 21  | 6 | 21  | 21  | 700.6245 | -1.0 | 0.8434  |
| 949: | 15  | 7 | 15  | 15  | - | 14  | 6 | 14  | 14  | 722.0422 | -1.0 | -1.1350 |
| 950: | 22  | 7 | 22  | 22  | - | 21  | 6 | 21  | 21  | 725.7620 | -1.0 | 1.5694  |
| 951: | 23  | 7 | 23  | 23  | - | 22  | 6 | 22  | 22  | 726.2803 | -1.0 | 1.0441  |
| 952: | 29  | 7 | 29  | 29  | - | 28  | 6 | 28  | 28  | 729.3273 | -1.0 | -0.4345 |
| 953: | 30  | 7 | 30  | 30  | - | 29  | 6 | 29  | 29  | 729.8246 | -1.0 | -0.4224 |
| 954: | 35  | 7 | 35  | 35  | - | 34  | 6 | 34  | 34  | 732.2637 | -1.0 | -1.2124 |
| 955: | 36  | 7 | 36  | 36  | - | 35  | 6 | 35  | 35  | 732.7429 | -1.0 | -0.6454 |
| 956: | 37  | 7 | 37  | 37  | - | 36  | 6 | 36  | 36  | 733.2188 | -1.0 | -0.2517 |
| 957: | 38  | 7 | 38  | 38  | - | 37  | 6 | 37  | 37  | 733.6921 | -1.0 | 0.6736  |
| 958: | 43  | 7 | 43  | 43  | - | 42  | 6 | 42  | 42  | 736.0052 | -1.0 | -0.9476 |
| 959: | 44  | 7 | 44  | 44  | - | 43  | 6 | 43  | 43  | 736.4588 | -1.0 | -0.8261 |
| 960: | 45  | 7 | 45  | 45  | - | 44  | 6 | 44  | 44  | 736.9085 | -1.0 | -1.4376 |
| 961: | 46  | 7 | 46  | 46  | - | 45  | 6 | 45  | 45  | 737.3573 | -1.0 | 0.2231  |
| 962: | 53  | 7 | 53  | 53  | - | 52  | 6 | 52  | 52  | 740.3978 | -1.0 | -0.0044 |
| 963: | 71  | 7 | 71  | 71  | - | 70  | 6 | 70  | 70  | 747.4888 | -1.0 | -0.8358 |
| 964: | 72  | 7 | 72  | 72  | - | 71  | 6 | 71  | 71  | 747.8506 | -1.0 | -1.8967 |
| 965: | 73  | 7 | 73  | 73  | - | 72  | 6 | 72  | 72  | 748.2121 | -1.0 | 0.0541  |
| 966: | 74  | 7 | 74  | 74  | - | 73  | 6 | 73  | 73  | 748.5679 | -1.0 | -0.3781 |
| 967: | 72  | 8 | 72  | 72  | - | 73  | 7 | 73  | 73  | 658.2984 | -1.0 | -2.6699 |
| 968: | 71  | 8 | 71  | 71  | - | 72  | 7 | 72  | 72  | 659.0859 | -1.0 | -0.2725 |
| 969: | 63  | 8 | 63  | 63  | - | 64  | 7 | 64  | 64  | 665.2711 | -1.0 | -1.2362 |
| 970: | 62  | 8 | 62  | 62  | - | 63  | 7 | 63  | 63  | 666.0339 | -1.0 | 0.1915  |
| 971: | 53  | 8 | 53  | 53  | - | 54  | 7 | 54  | 54  | 672.7660 | -1.0 | 0.1211  |
| 972: | 49  | 8 | 49  | 49  | - | 50  | 7 | 50  | 50  | 675.6878 | -1.0 | -0.1746 |
| 973: | 48  | 8 | 48  | 48  | - | 49  | 7 | 49  | 49  | 676.4120 | -1.0 | 0.2828  |
| 974: | 39  | 8 | 39  | 39  | - | 40  | 7 | 40  | 40  | 682.8023 | -1.0 | -0.0853 |
| 975: | 34  | 8 | 34  | 34  | - | 35  | 7 | 35  | 35  | 686.2563 | -1.0 | 0.0203  |
| 976: | 33  | 8 | 33  | 33  | - | 34  | 7 | 34  | 34  | 686.9391 | -1.0 | 0.3797  |
| 977: | 12  | 8 | 12  | 12  | - | 13  | 7 | 13  | 13  | 700.6198 | -1.0 | 1.5153  |
| 978: | 25  | 8 | 25  | 25  | - | 24  | 7 | 24  | 24  | 722.1030 | -1.0 | -0.0984 |
| 979: | 32  | 8 | 32  | 32  | - | 31  | 7 | 31  | 31  | 725.5870 | -1.0 | 2.1686  |
| 980: | 33  | 8 | 33  | 33  | - | 32  | 7 | 32  | 32  | 726.0712 | -1.0 | 1.3695  |
| 981: | 40  | 8 | 40  | 40  | - | 39  | 7 | 39  | 39  | 729.3771 | -1.0 | -0.2831 |
| 982: | 41  | 8 | 41  | 41  | - | 40  | 7 | 40  | 40  | 729.8367 | -1.0 | -0.6385 |
| 983: | 47  | 8 | 47  | 47  | - | 46  | 7 | 46  | 46  | 732.5296 | -1.0 | -1.0768 |
| 984: | 48  | 8 | 48  | 48  | - | 47  | 7 | 47  | 47  | 732.9687 | -1.0 | 0.2467  |
| 985: | 49  | 8 | 49  | 49  | - | 48  | 7 | 48  | 48  | 733.4030 | -1.0 | -0.0409 |
| 986: | 55  | 8 | 55  | 55  | - | 54  | 7 | 54  | 54  | 735.9416 | -1.0 | -1.7151 |

|       |    |    |    |    |   |    |   |    |    |          |      |         |
|-------|----|----|----|----|---|----|---|----|----|----------|------|---------|
| 987:  | 56 | 8  | 56 | 56 | - | 55 | 7 | 55 | 55 | 736.3543 | -1.0 | -1.1375 |
| 988:  | 57 | 8  | 57 | 57 | - | 56 | 7 | 56 | 56 | 736.7634 | -1.0 | -0.9300 |
| 989:  | 58 | 8  | 58 | 58 | - | 57 | 7 | 57 | 57 | 737.1706 | -1.0 | 0.6127  |
| 990:  | 66 | 8  | 66 | 66 | - | 65 | 7 | 65 | 65 | 740.2991 | -1.0 | 0.9397  |
| 991:  | 88 | 8  | 88 | 88 | - | 87 | 7 | 87 | 87 | 747.8093 | -1.0 | -0.1577 |
| 992:  | 89 | 8  | 89 | 89 | - | 88 | 7 | 88 | 88 | 748.1132 | -1.0 | 0.9760  |
| 993:  | 90 | 8  | 90 | 90 | - | 89 | 7 | 89 | 89 | 748.4143 | -1.0 | 2.7141  |
| 994:  | 65 | 9  | 65 | 65 | - | 66 | 8 | 66 | 66 | 658.8075 | -1.0 | -1.1341 |
| 995:  | 56 | 9  | 56 | 56 | - | 57 | 8 | 57 | 57 | 665.5870 | -1.0 | 0.0787  |
| 996:  | 42 | 9  | 42 | 42 | - | 43 | 8 | 43 | 43 | 675.6986 | -1.0 | 1.4179  |
| 997:  | 41 | 9  | 41 | 41 | - | 42 | 8 | 42 | 42 | 676.3990 | -1.0 | 0.1321  |
| 998:  | 36 | 9  | 36 | 36 | - | 37 | 8 | 37 | 37 | 679.8641 | -1.0 | -1.7901 |
| 999:  | 27 | 9  | 27 | 27 | - | 28 | 8 | 28 | 28 | 685.9323 | -1.0 | 1.1260  |
| 1000: | 26 | 9  | 26 | 26 | - | 27 | 8 | 27 | 27 | 686.5908 | -1.0 | -0.2617 |
| 1001: | 25 | 9  | 25 | 25 | - | 26 | 8 | 26 | 26 | 687.2477 | -1.0 | -0.4259 |
| 1002: | 8  | 9  | 8  | 8  | - | 7  | 8 | 7  | 7  | 707.8742 | -1.0 | -0.4203 |
| 1003: | 52 | 9  | 52 | 52 | - | 51 | 8 | 51 | 51 | 729.4062 | -1.0 | -0.6956 |
| 1004: | 53 | 9  | 53 | 53 | - | 52 | 8 | 52 | 52 | 729.8246 | -1.0 | -1.0590 |
| 1005: | 59 | 9  | 59 | 59 | - | 58 | 8 | 58 | 58 | 732.2694 | -1.0 | -1.1212 |
| 1006: | 60 | 9  | 60 | 60 | - | 59 | 8 | 59 | 59 | 732.6665 | -1.0 | -0.1635 |
| 1007: | 61 | 9  | 61 | 61 | - | 60 | 8 | 60 | 60 | 733.0589 | -1.0 | -0.6534 |
| 1008: | 62 | 9  | 62 | 62 | - | 61 | 8 | 61 | 61 | 733.4498 | -1.0 | 0.6143  |
| 1009: | 68 | 9  | 68 | 68 | - | 67 | 8 | 67 | 67 | 735.7184 | -1.0 | 0.1229  |
| 1010: | 71 | 9  | 71 | 71 | - | 70 | 8 | 70 | 70 | 736.8097 | -1.0 | 1.2793  |
| 1011: | 58 | 10 | 58 | 58 | - | 59 | 9 | 59 | 59 | 659.1511 | -1.0 | 0.4314  |
| 1012: | 49 | 10 | 49 | 49 | - | 50 | 9 | 50 | 50 | 665.7342 | -1.0 | 0.2615  |
| 1013: | 34 | 10 | 34 | 34 | - | 35 | 9 | 35 | 35 | 676.2153 | -1.0 | 0.3152  |
| 1014: | 29 | 10 | 29 | 29 | - | 30 | 9 | 30 | 30 | 679.5703 | -1.0 | 0.2447  |
| 1015: | 24 | 10 | 24 | 24 | - | 25 | 9 | 25 | 25 | 682.8555 | -1.0 | 0.6411  |
| 1016: | 19 | 10 | 19 | 19 | - | 20 | 9 | 20 | 20 | 686.0696 | -1.0 | 0.7868  |
| 1017: | 18 | 10 | 18 | 18 | - | 19 | 9 | 19 | 19 | 686.7031 | -1.0 | 0.0494  |
| 1018: | 17 | 10 | 17 | 17 | - | 18 | 9 | 18 | 18 | 687.3344 | -1.0 | -0.0259 |

(28)Si(34)S

|       |     |     |     |     |   |     |     |     |     |          |      |         |
|-------|-----|-----|-----|-----|---|-----|-----|-----|-----|----------|------|---------|
| 1019: | 103 | 171 | 103 | 103 | - | 104 | 170 | 104 | 104 | 658.7018 | -1.0 | -1.2410 |
| 1020: | 87  | 171 | 87  | 87  | - | 88  | 170 | 88  | 88  | 672.1207 | -1.0 | -1.0209 |
| 1021: | 83  | 171 | 83  | 83  | - | 84  | 170 | 84  | 84  | 675.3788 | -1.0 | -0.4178 |
| 1022: | 82  | 171 | 82  | 82  | - | 83  | 170 | 83  | 83  | 676.1871 | -1.0 | -0.3471 |
| 1023: | 69  | 171 | 69  | 69  | - | 70  | 170 | 70  | 70  | 686.4684 | -1.0 | -0.0911 |
| 1024: | 68  | 171 | 68  | 68  | - | 69  | 170 | 69  | 69  | 687.2416 | -1.0 | -0.2150 |
| 1025: | 54  | 171 | 54  | 54  | - | 55  | 170 | 55  | 55  | 697.8010 | -1.0 | -0.3443 |
| 1026: | 50  | 171 | 50  | 50  | - | 51  | 170 | 51  | 51  | 700.7261 | -1.0 | 0.2604  |
| 1027: | 40  | 171 | 40  | 40  | - | 41  | 170 | 41  | 41  | 707.8539 | -1.0 | -0.4937 |
| 1028: | 29  | 171 | 29  | 29  | - | 30  | 170 | 30  | 30  | 715.3912 | -1.0 | 0.9917  |
| 1029: | 24  | 171 | 24  | 24  | - | 25  | 170 | 25  | 25  | 718.7077 | -1.0 | -0.5324 |
| 1030: | 13  | 171 | 13  | 13  | - | 14  | 170 | 14  | 14  | 725.7698 | -1.0 | 1.5641  |
| 1031: | 7   | 171 | 7   | 7   | - | 8   | 170 | 8   | 8   | 729.4781 | -1.0 | -0.4984 |
| 1032: | 4   | 171 | 4   | 4   | - | 3   | 170 | 3   | 3   | 736.5957 | -1.0 | -1.3176 |
| 1033: | 5   | 171 | 5   | 5   | - | 4   | 170 | 4   | 4   | 737.1706 | -1.0 | -1.2392 |
| 1034: | 24  | 171 | 24  | 24  | - | 23  | 170 | 23  | 23  | 747.5463 | -1.0 | -0.6691 |
| 1035: | 25  | 171 | 25  | 25  | - | 24  | 170 | 24  | 24  | 748.0639 | -1.0 | -0.0454 |
| 1036: | 26  | 171 | 26  | 26  | - | 25  | 170 | 25  | 25  | 748.5777 | -1.0 | -0.2812 |
| 1037: | 47  | 171 | 47  | 47  | - | 46  | 170 | 46  | 46  | 758.6845 | -1.0 | -0.7111 |
| 1038: | 48  | 171 | 48  | 48  | - | 47  | 170 | 47  | 47  | 759.1340 | -1.0 | 0.6263  |
| 1039: | 50  | 171 | 50  | 50  | - | 49  | 170 | 49  | 49  | 760.0203 | -1.0 | -0.2492 |
| 1040: | 59  | 171 | 59  | 59  | - | 58  | 170 | 58  | 58  | 763.8604 | -1.0 | -0.5287 |
| 1041: | 69  | 171 | 69  | 69  | - | 68  | 170 | 68  | 68  | 767.8332 | -1.0 | -0.0934 |
| 1042: | 98  | 172 | 98  | 98  | - | 99  | 171 | 99  | 99  | 658.2179 | -1.0 | -1.5325 |
| 1043: | 89  | 172 | 89  | 89  | - | 90  | 171 | 90  | 90  | 665.7094 | -1.0 | -0.4928 |
| 1044: | 81  | 172 | 81  | 81  | - | 82  | 171 | 82  | 82  | 672.2020 | -1.0 | -0.3908 |
| 1045: | 77  | 172 | 77  | 77  | - | 78  | 171 | 78  | 78  | 675.3890 | -1.0 | -0.4728 |
| 1046: | 63  | 172 | 63  | 63  | - | 64  | 171 | 64  | 64  | 686.2286 | -1.0 | -0.5025 |
| 1047: | 62  | 172 | 62  | 62  | - | 63  | 171 | 63  | 63  | 686.9844 | -1.0 | -0.0035 |
| 1048: | 48  | 172 | 48  | 48  | - | 49  | 171 | 49  | 49  | 697.2894 | -1.0 | 0.4902  |
| 1049: | 43  | 172 | 43  | 43  | - | 44  | 171 | 44  | 44  | 700.8463 | -1.0 | 0.5735  |
| 1050: | 38  | 172 | 38  | 38  | - | 39  | 171 | 39  | 39  | 704.3358 | -1.0 | -0.9539 |
| 1051: | 33  | 172 | 33  | 33  | - | 34  | 171 | 34  | 34  | 707.7628 | -1.0 | 1.3504  |
| 1052: | 22  | 172 | 22  | 22  | - | 23  | 171 | 23  | 23  | 715.0592 | -1.0 | -0.4009 |
| 1053: | 10  | 172 | 10  | 10  | - | 11  | 171 | 11  | 11  | 722.6445 | -1.0 | -0.6719 |
| 1054: | 6   | 172 | 6   | 6   | - | 5   | 171 | 5   | 5   | 732.7039 | -1.0 | -1.1348 |
| 1055: | 7   | 172 | 7   | 7   | - | 6   | 171 | 6   | 6   | 733.2701 | -1.0 | -1.2261 |

|       |    |     |    |    |   |    |     |    |    |          |      |         |
|-------|----|-----|----|----|---|----|-----|----|----|----------|------|---------|
| 1056: | 12 | 172 | 12 | 12 | - | 11 | 171 | 11 | 11 | 736.0574 | -1.0 | -2.4185 |
| 1057: | 13 | 172 | 13 | 13 | - | 12 | 171 | 12 | 12 | 736.6079 | -1.0 | -0.9921 |
| 1058: | 14 | 172 | 14 | 14 | - | 13 | 171 | 13 | 13 | 737.1547 | -1.0 | -0.3801 |
| 1059: | 20 | 172 | 20 | 20 | - | 19 | 171 | 19 | 19 | 740.3720 | -1.0 | 0.6482  |
| 1060: | 34 | 172 | 34 | 34 | - | 33 | 171 | 33 | 33 | 747.4651 | -1.0 | -0.6544 |
| 1061: | 35 | 172 | 35 | 35 | - | 34 | 171 | 34 | 34 | 747.9498 | -1.0 | -0.4770 |
| 1062: | 36 | 172 | 36 | 36 | - | 35 | 171 | 35 | 35 | 748.4321 | -1.0 | 0.2881  |
| 1063: | 59 | 172 | 59 | 59 | - | 58 | 171 | 58 | 58 | 758.6712 | -1.0 | -0.4812 |
| 1064: | 60 | 172 | 60 | 60 | - | 59 | 171 | 59 | 59 | 759.0797 | -1.0 | -0.3949 |
| 1065: | 73 | 172 | 73 | 73 | - | 72 | 171 | 72 | 72 | 764.1049 | -1.0 | -0.1373 |
| 1066: | 85 | 172 | 85 | 85 | - | 84 | 171 | 84 | 84 | 768.2683 | -1.0 | 0.0252  |
| 1067: | 83 | 173 | 83 | 83 | - | 84 | 172 | 84 | 84 | 665.8139 | -1.0 | -0.2437 |
| 1068: | 75 | 173 | 75 | 75 | - | 76 | 172 | 76 | 76 | 672.1657 | -1.0 | -0.1429 |
| 1069: | 71 | 173 | 71 | 71 | - | 72 | 172 | 72 | 72 | 675.2813 | -1.0 | -0.6185 |
| 1070: | 61 | 173 | 61 | 61 | - | 62 | 172 | 62 | 62 | 682.8968 | -1.0 | 1.1743  |
| 1071: | 57 | 173 | 57 | 57 | - | 58 | 172 | 58 | 58 | 685.8707 | -1.0 | 0.8907  |
| 1072: | 56 | 173 | 56 | 56 | - | 57 | 172 | 57 | 57 | 686.6068 | -1.0 | -0.1363 |
| 1073: | 55 | 173 | 55 | 55 | - | 56 | 172 | 56 | 56 | 687.3415 | -1.0 | 0.0128  |
| 1074: | 41 | 173 | 41 | 41 | - | 42 | 172 | 42 | 42 | 697.3526 | -1.0 | 0.2826  |
| 1075: | 36 | 173 | 36 | 36 | - | 37 | 172 | 37 | 37 | 700.8034 | -1.0 | 0.5962  |
| 1076: | 9  | 173 | 9  | 9  | - | 8  | 172 | 8  | 8  | 729.3534 | -1.0 | -0.2857 |
| 1077: | 15 | 173 | 15 | 15 | - | 14 | 172 | 14 | 14 | 732.6382 | -1.0 | -1.5469 |
| 1078: | 16 | 173 | 16 | 16 | - | 15 | 172 | 15 | 15 | 733.1774 | -1.0 | 0.0828  |
| 1079: | 22 | 173 | 22 | 22 | - | 21 | 172 | 21 | 21 | 736.3409 | -1.0 | -0.7800 |
| 1080: | 23 | 173 | 23 | 23 | - | 22 | 172 | 22 | 22 | 736.8574 | -1.0 | -1.4542 |
| 1081: | 24 | 173 | 24 | 24 | - | 23 | 172 | 23 | 23 | 737.3731 | -1.0 | 0.0038  |
| 1082: | 46 | 173 | 46 | 46 | - | 45 | 172 | 45 | 45 | 747.9347 | -1.0 | -0.4211 |
| 1083: | 47 | 173 | 47 | 47 | - | 46 | 172 | 46 | 46 | 748.3791 | -1.0 | -1.5310 |
| 1084: | 73 | 173 | 73 | 73 | - | 72 | 172 | 72 | 72 | 758.8809 | -1.0 | -0.1827 |
| 1085: | 88 | 173 | 88 | 88 | - | 87 | 172 | 87 | 87 | 763.9691 | -1.0 | -0.4555 |
| 1086: | 77 | 174 | 77 | 77 | - | 78 | 173 | 78 | 78 | 665.8017 | -1.0 | 0.3231  |
| 1087: | 68 | 174 | 68 | 68 | - | 69 | 173 | 69 | 69 | 672.7750 | -1.0 | -1.0006 |
| 1088: | 64 | 174 | 64 | 64 | - | 65 | 173 | 65 | 65 | 675.8095 | -1.0 | -0.8427 |
| 1089: | 49 | 174 | 49 | 49 | - | 50 | 173 | 50 | 50 | 686.8249 | -1.0 | 0.3113  |
| 1090: | 19 | 174 | 19 | 19 | - | 18 | 173 | 18 | 18 | 729.7082 | -1.0 | 0.1082  |
| 1091: | 24 | 174 | 24 | 24 | - | 23 | 173 | 23 | 23 | 732.2935 | -1.0 | -0.8884 |
| 1092: | 25 | 174 | 25 | 25 | - | 24 | 173 | 24 | 24 | 732.8029 | -1.0 | 0.0461  |
| 1093: | 26 | 174 | 26 | 26 | - | 25 | 173 | 25 | 25 | 733.3080 | -1.0 | -0.3773 |
| 1094: | 34 | 174 | 34 | 34 | - | 33 | 173 | 33 | 33 | 737.2455 | -1.0 | -0.5874 |
| 1095: | 41 | 174 | 41 | 41 | - | 40 | 173 | 40 | 40 | 740.5355 | -1.0 | 0.5084  |

(29)Si(32)S

|       |     |    |     |     |   |     |    |     |     |          |      |         |
|-------|-----|----|-----|-----|---|-----|----|-----|-----|----------|------|---------|
| 1096: | 106 | 61 | 106 | 106 | - | 107 | 60 | 107 | 107 | 658.7018 | -1.0 | -0.1923 |
| 1097: | 90  | 61 | 90  | 90  | - | 91  | 60 | 91  | 91  | 672.3789 | -1.0 | -0.3895 |
| 1098: | 85  | 61 | 85  | 85  | - | 86  | 60 | 86  | 86  | 676.5253 | -1.0 | 0.5012  |
| 1099: | 81  | 61 | 81  | 81  | - | 82  | 60 | 82  | 82  | 679.7951 | -1.0 | -1.3757 |
| 1100: | 73  | 61 | 73  | 73  | - | 74  | 60 | 74  | 74  | 686.2185 | -1.0 | -0.9043 |
| 1101: | 72  | 61 | 72  | 72  | - | 73  | 60 | 73  | 73  | 687.0108 | -1.0 | -0.0980 |
| 1102: | 54  | 61 | 54  | 54  | - | 55  | 60 | 55  | 55  | 700.8195 | -1.0 | 0.4409  |
| 1103: | 34  | 61 | 34  | 34  | - | 35  | 60 | 35  | 35  | 715.1647 | -1.0 | -0.4039 |
| 1104: | 29  | 61 | 29  | 29  | - | 30  | 60 | 30  | 30  | 718.5824 | -1.0 | -1.4094 |
| 1105: | 18  | 61 | 18  | 18  | - | 19  | 60 | 19  | 19  | 725.8659 | -1.0 | 1.9108  |
| 1106: | 12  | 61 | 12  | 12  | - | 13  | 60 | 13  | 13  | 729.6932 | -1.0 | -0.4588 |
| 1107: | 8   | 61 | 8   | 8   | - | 9   | 60 | 9   | 9   | 732.1893 | -1.0 | -1.4114 |
| 1108: | 7   | 61 | 7   | 7   | - | 8   | 60 | 8   | 8   | 732.8068 | -1.0 | -1.1253 |
| 1109: | 6   | 61 | 6   | 6   | - | 7   | 60 | 7   | 7   | 733.4227 | -1.0 | 0.3898  |
| 1110: | 5   | 61 | 5   | 5   | - | 4   | 60 | 4   | 4   | 740.5725 | -1.0 | -0.1101 |
| 1111: | 18  | 61 | 18  | 18  | - | 17  | 60 | 17  | 17  | 747.8506 | -1.0 | 1.5006  |
| 1112: | 19  | 61 | 19  | 19  | - | 18  | 60 | 18  | 18  | 748.3883 | -1.0 | -0.0157 |
| 1113: | 39  | 61 | 39  | 39  | - | 38  | 60 | 38  | 38  | 758.5463 | -1.0 | 0.2499  |
| 1114: | 40  | 61 | 40  | 40  | - | 39  | 60 | 39  | 39  | 759.0226 | -1.0 | 0.3574  |
| 1115: | 42  | 61 | 42  | 42  | - | 41  | 60 | 41  | 41  | 759.9663 | -1.0 | 0.8376  |
| 1116: | 51  | 61 | 51  | 51  | - | 50  | 60 | 50  | 50  | 764.0564 | -1.0 | -1.3769 |
| 1117: | 59  | 61 | 59  | 59  | - | 58  | 60 | 58  | 58  | 767.4847 | -1.0 | 0.4374  |
| 1118: | 60  | 61 | 60  | 60  | - | 59  | 60 | 59  | 59  | 767.8985 | -1.0 | 0.0293  |
| 1119: | 92  | 62 | 92  | 92  | - | 93  | 61 | 93  | 93  | 665.9005 | -1.0 | -0.4073 |
| 1120: | 84  | 62 | 84  | 84  | - | 85  | 61 | 85  | 85  | 672.5207 | -1.0 | -0.1382 |
| 1121: | 80  | 62 | 80  | 80  | - | 81  | 61 | 81  | 81  | 675.7704 | -1.0 | -0.7515 |
| 1122: | 75  | 62 | 75  | 75  | - | 76  | 61 | 76  | 76  | 679.7766 | -1.0 | -0.9847 |
| 1123: | 67  | 62 | 67  | 67  | - | 68  | 61 | 68  | 68  | 686.0562 | -1.0 | 0.0508  |
| 1124: | 66  | 62 | 66  | 66  | - | 67  | 61 | 67  | 67  | 686.8292 | -1.0 | -0.2808 |

|       |    |    |    |    |   |    |    |    |    |          |      |         |
|-------|----|----|----|----|---|----|----|----|----|----------|------|---------|
| 1125: | 52 | 62 | 52 | 52 | - | 53 | 61 | 53 | 53 | 697.3856 | -1.0 | 1.0082  |
| 1126: | 48 | 62 | 48 | 48 | - | 49 | 61 | 49 | 49 | 700.3052 | -1.0 | -1.0540 |
| 1127: | 47 | 62 | 47 | 47 | - | 48 | 61 | 48 | 48 | 701.0311 | -1.0 | 1.0330  |
| 1128: | 43 | 62 | 43 | 43 | - | 44 | 61 | 44 | 44 | 703.8986 | -1.0 | -0.1772 |
| 1129: | 16 | 62 | 16 | 16 | - | 17 | 61 | 17 | 17 | 722.1312 | -1.0 | -0.8297 |
| 1130: | 4  | 62 | 4  | 4  | - | 5  | 61 | 5  | 5  | 729.5870 | -1.0 | -1.5388 |
| 1131: | 2  | 62 | 2  | 2  | - | 1  | 61 | 1  | 1  | 733.7504 | -1.0 | 0.7731  |
| 1132: | 6  | 62 | 6  | 6  | - | 5  | 61 | 5  | 5  | 736.0640 | -1.0 | -0.2411 |
| 1133: | 7  | 62 | 7  | 7  | - | 6  | 61 | 6  | 6  | 736.6352 | -1.0 | -0.4722 |
| 1134: | 8  | 62 | 8  | 8  | - | 7  | 61 | 7  | 7  | 737.2042 | -1.0 | -0.0051 |
| 1135: | 28 | 62 | 28 | 28 | - | 27 | 61 | 27 | 27 | 747.9589 | -1.0 | -0.1467 |
| 1136: | 29 | 62 | 29 | 29 | - | 28 | 61 | 28 | 28 | 748.4659 | -1.0 | 0.2635  |
| 1137: | 51 | 62 | 51 | 51 | - | 50 | 61 | 50 | 50 | 758.8422 | -1.0 | -0.5755 |
| 1138: | 63 | 62 | 63 | 63 | - | 62 | 61 | 62 | 62 | 763.8719 | -1.0 | -0.5517 |
| 1139: | 74 | 62 | 74 | 74 | - | 73 | 61 | 73 | 73 | 768.0828 | -1.0 | 0.0814  |
| 1140: | 95 | 63 | 95 | 95 | - | 96 | 62 | 96 | 96 | 658.5878 | -1.0 | -0.9163 |
| 1141: | 78 | 63 | 78 | 78 | - | 79 | 62 | 79 | 79 | 672.5444 | -1.0 | 0.3601  |
| 1142: | 74 | 63 | 74 | 74 | - | 75 | 62 | 75 | 75 | 675.7224 | -1.0 | -0.3030 |
| 1143: | 73 | 63 | 73 | 73 | - | 74 | 62 | 74 | 74 | 676.5111 | -1.0 | 0.0548  |
| 1144: | 69 | 63 | 69 | 69 | - | 70 | 62 | 70 | 70 | 679.6369 | -1.0 | -2.0922 |
| 1145: | 60 | 63 | 60 | 60 | - | 61 | 62 | 61 | 61 | 686.5285 | -1.0 | 1.5083  |
| 1146: | 59 | 63 | 59 | 59 | - | 60 | 62 | 60 | 60 | 687.2798 | -1.0 | 0.3854  |
| 1147: | 40 | 63 | 40 | 40 | - | 41 | 62 | 41 | 41 | 701.0780 | -1.0 | 1.1007  |
| 1148: | 3  | 63 | 3  | 3  | - | 2  | 62 | 2  | 2  | 729.2600 | -1.0 | -1.3448 |
| 1149: | 9  | 63 | 9  | 9  | - | 8  | 62 | 8  | 8  | 732.6803 | -1.0 | -1.0659 |
| 1150: | 10 | 63 | 10 | 10 | - | 9  | 62 | 9  | 9  | 733.2412 | -1.0 | -0.0188 |
| 1151: | 16 | 63 | 16 | 16 | - | 15 | 62 | 15 | 15 | 736.5379 | -1.0 | -1.1083 |
| 1152: | 17 | 63 | 17 | 17 | - | 16 | 62 | 16 | 16 | 737.0779 | -1.0 | -0.4749 |
| 1153: | 23 | 63 | 23 | 23 | - | 22 | 62 | 22 | 22 | 740.2523 | -1.0 | -0.2573 |
| 1154: | 38 | 63 | 38 | 38 | - | 37 | 62 | 37 | 37 | 747.7175 | -1.0 | 0.0774  |
| 1155: | 39 | 63 | 39 | 39 | - | 38 | 62 | 38 | 38 | 748.1905 | -1.0 | -0.3982 |
| 1156: | 63 | 63 | 63 | 63 | - | 62 | 62 | 62 | 62 | 758.6282 | -1.0 | -0.0189 |
| 1157: | 77 | 63 | 77 | 77 | - | 76 | 62 | 76 | 76 | 763.8786 | -1.0 | -0.0178 |
| 1158: | 89 | 63 | 89 | 89 | - | 88 | 62 | 88 | 88 | 767.8749 | -1.0 | 0.3178  |
| 1159: | 90 | 63 | 90 | 90 | - | 89 | 62 | 89 | 89 | 768.1860 | -1.0 | -0.2689 |
| 1160: | 54 | 64 | 54 | 54 | - | 55 | 63 | 55 | 55 | 686.1028 | -1.0 | 0.4021  |
| 1161: | 53 | 64 | 53 | 53 | - | 54 | 63 | 54 | 54 | 686.8362 | -1.0 | -0.1241 |
| 1162: | 18 | 64 | 18 | 18 | - | 17 | 63 | 17 | 17 | 732.5052 | -1.0 | -0.8063 |
| 1163: | 19 | 64 | 19 | 19 | - | 18 | 63 | 18 | 18 | 733.0366 | -1.0 | -0.0017 |
| 1164: | 20 | 64 | 20 | 20 | - | 19 | 63 | 19 | 19 | 733.5644 | -1.0 | 0.1583  |
| 1165: | 26 | 64 | 26 | 26 | - | 25 | 63 | 25 | 25 | 736.6676 | -1.0 | -0.1554 |
| 1166: | 49 | 64 | 49 | 49 | - | 48 | 63 | 48 | 48 | 747.5589 | -1.0 | 0.0344  |
| 1167: | 78 | 64 | 78 | 78 | - | 77 | 63 | 77 | 77 | 758.9480 | -1.0 | 1.1904  |

(30)Si(32)S

|       |     |     |     |     |   |     |     |     |     |          |      |         |
|-------|-----|-----|-----|-----|---|-----|-----|-----|-----|----------|------|---------|
| 1168: | 100 | 101 | 100 | 100 | - | 101 | 100 | 101 | 101 | 658.8792 | -1.0 | -0.0605 |
| 1169: | 66  | 101 | 66  | 66  | - | 67  | 100 | 67  | 67  | 686.1357 | -1.0 | -0.3439 |
| 1170: | 65  | 101 | 65  | 65  | - | 66  | 100 | 66  | 66  | 686.8952 | -1.0 | 0.4908  |
| 1171: | 51  | 101 | 51  | 51  | - | 52  | 100 | 52  | 52  | 697.2505 | -1.0 | -0.4181 |
| 1172: | 46  | 101 | 46  | 46  | - | 47  | 100 | 47  | 47  | 700.8286 | -1.0 | 0.2916  |
| 1173: | 8   | 101 | 8   | 8   | - | 9   | 100 | 9   | 9   | 725.8659 | -1.0 | 1.1574  |
| 1174: | 4   | 101 | 4   | 4   | - | 3   | 100 | 3   | 3   | 733.5304 | -1.0 | 0.4725  |
| 1175: | 8   | 101 | 8   | 8   | - | 7   | 100 | 7   | 7   | 735.7922 | -1.0 | -1.2037 |
| 1176: | 10  | 101 | 10  | 10  | - | 9   | 100 | 9   | 9   | 736.9085 | -1.0 | 0.2998  |
| 1177: | 11  | 101 | 11  | 11  | - | 10  | 100 | 10  | 10  | 737.4611 | -1.0 | -0.2473 |
| 1178: | 30  | 101 | 30  | 30  | - | 29  | 100 | 29  | 29  | 747.4259 | -1.0 | -0.4844 |
| 1179: | 31  | 101 | 31  | 31  | - | 30  | 100 | 30  | 30  | 747.9219 | -1.0 | 0.0288  |
| 1180: | 32  | 101 | 32  | 32  | - | 31  | 100 | 31  | 31  | 748.4143 | -1.0 | -0.1271 |
| 1181: | 54  | 101 | 54  | 54  | - | 53  | 100 | 53  | 53  | 758.4982 | -1.0 | -1.6427 |
| 1182: | 55  | 101 | 55  | 55  | - | 54  | 100 | 54  | 54  | 758.9238 | -1.0 | 0.0837  |
| 1183: | 67  | 101 | 67  | 67  | - | 66  | 100 | 66  | 66  | 763.7698 | -1.0 | -1.7747 |
| 1184: | 68  | 101 | 68  | 68  | - | 67  | 100 | 67  | 67  | 764.1538 | -1.0 | -1.7342 |
| 1185: | 79  | 101 | 79  | 79  | - | 78  | 100 | 78  | 78  | 768.1722 | -1.0 | -1.0122 |
| 1186: | 95  | 102 | 95  | 95  | - | 96  | 101 | 96  | 96  | 658.3479 | -1.0 | -1.8128 |
| 1187: | 64  | 102 | 64  | 64  | - | 65  | 101 | 65  | 65  | 682.8518 | -1.0 | -0.0549 |
| 1188: | 60  | 102 | 60  | 60  | - | 61  | 101 | 61  | 61  | 685.8410 | -1.0 | 0.7703  |
| 1189: | 59  | 102 | 59  | 59  | - | 60  | 101 | 60  | 60  | 686.5809 | -1.0 | -0.1143 |
| 1190: | 58  | 102 | 58  | 58  | - | 59  | 101 | 59  | 59  | 687.3194 | -1.0 | 0.1332  |
| 1191: | 49  | 102 | 49  | 49  | - | 50  | 101 | 50  | 50  | 693.8482 | -1.0 | -0.7077 |
| 1192: | 44  | 102 | 44  | 44  | - | 45  | 101 | 45  | 45  | 697.3856 | -1.0 | -0.9909 |
| 1193: | 39  | 102 | 39  | 39  | - | 40  | 101 | 40  | 40  | 700.8607 | -1.0 | 1.3073  |

|       |    |     |    |    |   |    |     |    |    |          |      |         |
|-------|----|-----|----|----|---|----|-----|----|----|----------|------|---------|
| 1194: | 34 | 102 | 34 | 34 | - | 35 | 101 | 35 | 35 | 704.2666 | -1.0 | -0.1803 |
| 1195: | 29 | 102 | 29 | 29 | - | 30 | 101 | 30 | 30 | 707.6088 | -1.0 | 0.5820  |
| 1196: | 6  | 102 | 6  | 6  | - | 5  | 101 | 5  | 5  | 729.6692 | -1.0 | -1.3741 |
| 1197: | 11 | 102 | 11 | 11 | - | 10 | 101 | 10 | 10 | 732.4522 | -1.0 | 1.5461  |
| 1198: | 12 | 102 | 12 | 12 | - | 11 | 101 | 11 | 11 | 732.9982 | -1.0 | 0.0333  |
| 1199: | 17 | 102 | 17 | 17 | - | 16 | 101 | 16 | 16 | 735.6927 | -1.0 | -0.2676 |
| 1200: | 18 | 102 | 18 | 18 | - | 17 | 101 | 17 | 17 | 736.2219 | -1.0 | -1.4435 |
| 1201: | 19 | 102 | 19 | 19 | - | 18 | 101 | 18 | 18 | 736.7499 | -1.0 | -0.9474 |
| 1202: | 20 | 102 | 20 | 20 | - | 19 | 101 | 19 | 19 | 737.2755 | -1.0 | 0.0252  |
| 1203: | 26 | 102 | 26 | 26 | - | 25 | 101 | 25 | 25 | 740.3633 | -1.0 | 0.7219  |
| 1204: | 41 | 102 | 41 | 41 | - | 40 | 101 | 40 | 40 | 747.6198 | -1.0 | -0.2998 |
| 1205: | 42 | 102 | 42 | 42 | - | 41 | 101 | 41 | 41 | 748.0801 | -1.0 | -0.1879 |
| 1206: | 43 | 102 | 43 | 43 | - | 42 | 101 | 42 | 42 | 748.5374 | -1.0 | -0.0939 |
| 1207: | 67 | 102 | 67 | 67 | - | 66 | 101 | 66 | 66 | 758.6029 | -1.0 | -0.7821 |
| 1208: | 68 | 102 | 68 | 68 | - | 67 | 101 | 67 | 67 | 758.9847 | -1.0 | -0.1153 |
| 1209: | 82 | 102 | 82 | 82 | - | 81 | 101 | 81 | 81 | 763.9916 | -1.0 | -0.9393 |
| 1210: | 89 | 103 | 89 | 89 | - | 90 | 102 | 90 | 90 | 658.5494 | -1.0 | -0.7976 |
| 1211: | 67 | 103 | 67 | 67 | - | 68 | 102 | 68 | 68 | 675.7980 | -1.0 | -0.8852 |
| 1212: | 53 | 103 | 53 | 53 | - | 54 | 102 | 54 | 54 | 686.1486 | -1.0 | 0.3234  |
| 1213: | 52 | 103 | 52 | 52 | - | 53 | 102 | 53 | 53 | 686.8690 | -1.0 | 0.5264  |
| 1214: | 37 | 103 | 37 | 37 | - | 38 | 102 | 38 | 38 | 697.3610 | -1.0 | -0.6573 |
| 1215: | 21 | 103 | 21 | 21 | - | 22 | 102 | 22 | 22 | 707.9016 | -1.0 | -1.3090 |
| 1216: | 15 | 103 | 15 | 15 | - | 14 | 102 | 14 | 14 | 729.6073 | -1.0 | 0.0130  |
| 1217: | 20 | 103 | 20 | 20 | - | 19 | 102 | 19 | 19 | 732.2440 | -1.0 | -1.1534 |
| 1218: | 21 | 103 | 21 | 21 | - | 20 | 102 | 20 | 20 | 732.7629 | -1.0 | -1.2003 |
| 1219: | 22 | 103 | 22 | 22 | - | 21 | 102 | 21 | 21 | 733.2799 | -1.0 | -0.2612 |
| 1220: | 28 | 103 | 28 | 28 | - | 27 | 102 | 27 | 27 | 736.3148 | -1.0 | -0.8635 |
| 1221: | 29 | 103 | 29 | 29 | - | 28 | 102 | 28 | 28 | 736.8097 | -1.0 | -1.6941 |
| 1222: | 30 | 103 | 30 | 30 | - | 29 | 102 | 29 | 29 | 737.3047 | -1.0 | 0.4979  |
| 1223: | 36 | 103 | 36 | 36 | - | 35 | 102 | 35 | 35 | 740.2007 | -1.0 | 1.2828  |
| 1224: | 52 | 103 | 52 | 52 | - | 51 | 102 | 51 | 51 | 747.3967 | -1.0 | -0.5056 |
| 1225: | 53 | 103 | 53 | 53 | - | 52 | 102 | 52 | 52 | 747.8216 | -1.0 | 0.0842  |
| 1226: | 54 | 103 | 54 | 54 | - | 53 | 102 | 53 | 53 | 748.2426 | -1.0 | -0.1917 |
| 1227: | 81 | 103 | 81 | 81 | - | 80 | 102 | 80 | 80 | 758.4519 | -1.0 | -1.0753 |
| 1228: | 82 | 103 | 82 | 82 | - | 81 | 102 | 81 | 81 | 758.7865 | -1.0 | -0.8613 |
| 1229: | 83 | 103 | 83 | 83 | - | 82 | 102 | 82 | 82 | 759.1173 | -1.0 | -1.2744 |
| 1230: | 74 | 104 | 74 | 74 | - | 75 | 103 | 75 | 75 | 665.6780 | -1.0 | -1.0487 |
| 1231: | 61 | 104 | 61 | 61 | - | 62 | 103 | 62 | 62 | 675.4982 | -1.0 | -0.1034 |
| 1232: | 60 | 104 | 60 | 60 | - | 61 | 103 | 61 | 61 | 676.2361 | -1.0 | 0.0246  |
| 1233: | 45 | 104 | 45 | 45 | - | 46 | 103 | 46 | 46 | 686.9970 | -1.0 | 0.1230  |
| 1234: | 24 | 104 | 24 | 24 | - | 23 | 103 | 23 | 23 | 729.2676 | -1.0 | 0.1480  |
| 1235: | 25 | 104 | 25 | 25 | - | 24 | 103 | 24 | 24 | 729.7716 | -1.0 | -0.4232 |
| 1236: | 30 | 104 | 30 | 30 | - | 29 | 103 | 29 | 29 | 732.2496 | -1.0 | -1.6138 |
| 1237: | 33 | 104 | 33 | 33 | - | 32 | 103 | 32 | 32 | 733.7045 | -1.0 | 0.8695  |
| 1238: | 40 | 104 | 40 | 40 | - | 39 | 103 | 39 | 39 | 736.9890 | -1.0 | -0.4271 |
| 1239: | 41 | 104 | 41 | 41 | - | 40 | 103 | 40 | 40 | 737.4468 | -1.0 | -0.1671 |
| 1240: | 65 | 104 | 65 | 65 | - | 64 | 103 | 64 | 64 | 747.5227 | -1.0 | -0.7925 |

2) from Frum et al.

(28)Si(32)S

|       |     |   |     |     |   |     |   |     |     |           |       |         |
|-------|-----|---|-----|-----|---|-----|---|-----|-----|-----------|-------|---------|
| 1241: | 128 | 1 | 128 | 128 | - | 129 | 0 | 129 | 129 | 643.68575 | -0.50 | 0.5617  |
| 1242: | 127 | 1 | 127 | 127 | - | 128 | 0 | 128 | 128 | 644.62997 | -0.50 | -0.2214 |
| 1243: | 126 | 1 | 126 | 126 | - | 127 | 0 | 127 | 127 | 645.57242 | -0.50 | -0.3976 |
| 1244: | 123 | 1 | 123 | 123 | - | 124 | 0 | 124 | 124 | 648.38604 | -0.50 | -0.3550 |
| 1245: | 122 | 1 | 122 | 122 | - | 123 | 0 | 123 | 123 | 649.31895 | -0.50 | -0.5234 |
| 1246: | 120 | 1 | 120 | 120 | - | 121 | 0 | 121 | 121 | 651.17872 | -0.50 | 0.2852  |
| 1247: | 119 | 1 | 119 | 119 | - | 120 | 0 | 120 | 120 | 652.10402 | -0.50 | -0.2896 |
| 1248: | 118 | 1 | 118 | 118 | - | 119 | 0 | 119 | 119 | 653.02764 | -0.50 | -0.1350 |
| 1249: | 117 | 1 | 117 | 117 | - | 118 | 0 | 118 | 118 | 653.94891 | -0.50 | 0.0831  |
| 1250: | 116 | 1 | 116 | 116 | - | 117 | 0 | 117 | 117 | 654.86705 | -0.50 | -0.4111 |
| 1251: | 115 | 1 | 115 | 115 | - | 116 | 0 | 116 | 116 | 655.78379 | -0.50 | 0.1164  |
| 1252: | 114 | 1 | 114 | 114 | - | 115 | 0 | 115 | 115 | 656.69752 | -0.50 | 0.0599  |
| 1253: | 113 | 1 | 113 | 113 | - | 114 | 0 | 114 | 114 | 657.60859 | -0.50 | -0.2267 |
| 1254: | 112 | 1 | 112 | 112 | - | 113 | 0 | 113 | 113 | 658.51793 | -0.50 | 0.1910  |
| 1255: | 111 | 1 | 111 | 111 | - | 112 | 0 | 112 | 112 | 659.42443 | -0.50 | 0.2070  |
| 1256: | 109 | 1 | 109 | 109 | - | 110 | 0 | 110 | 110 | 661.22966 | -0.50 | -0.1992 |
| 1257: | 108 | 1 | 108 | 108 | - | 109 | 0 | 109 | 109 | 662.12914 | -0.50 | 0.1368  |
| 1258: | 107 | 1 | 107 | 107 | - | 108 | 0 | 108 | 108 | 663.02562 | -0.50 | -0.0721 |
| 1259: | 106 | 1 | 106 | 106 | - | 107 | 0 | 107 | 107 | 663.91980 | -0.50 | -0.1217 |
| 1260: | 105 | 1 | 105 | 105 | - | 106 | 0 | 106 | 106 | 664.81177 | -0.50 | 0.0820  |

|       |     |   |     |     |   |     |   |     |     |           |       |         |
|-------|-----|---|-----|-----|---|-----|---|-----|-----|-----------|-------|---------|
| 1261: | 104 | 1 | 104 | 104 | - | 105 | 0 | 105 | 105 | 665.70129 | -0.50 | 0.3034  |
| 1262: | 103 | 1 | 103 | 103 | - | 104 | 0 | 104 | 104 | 666.58769 | -0.50 | -0.1233 |
| 1263: | 102 | 1 | 102 | 102 | - | 103 | 0 | 103 | 103 | 667.47199 | -0.50 | -0.1739 |
| 1264: | 101 | 1 | 101 | 101 | - | 102 | 0 | 102 | 102 | 668.35389 | -0.50 | -0.1443 |
| 1265: | 100 | 1 | 100 | 100 | - | 101 | 0 | 101 | 101 | 669.23319 | -0.50 | -0.2301 |
| 1266: | 99  | 1 | 99  | 99  | - | 100 | 0 | 100 | 100 | 670.11026 | -0.50 | -0.0571 |
| 1267: | 98  | 1 | 98  | 98  | - | 99  | 0 | 99  | 99  | 670.98441 | -0.50 | -0.3111 |
| 1268: | 97  | 1 | 97  | 97  | - | 98  | 0 | 98  | 98  | 671.85661 | -0.50 | -0.0179 |
| 1269: | 96  | 1 | 96  | 96  | - | 97  | 0 | 97  | 97  | 672.72604 | -0.50 | 0.0070  |
| 1270: | 95  | 1 | 95  | 95  | - | 96  | 0 | 96  | 96  | 673.59297 | -0.50 | 0.0376  |
| 1271: | 94  | 1 | 94  | 94  | - | 95  | 0 | 95  | 95  | 674.45733 | -0.50 | 0.0083  |
| 1272: | 93  | 1 | 93  | 93  | - | 94  | 0 | 94  | 94  | 675.31911 | -0.50 | -0.0866 |
| 1273: | 92  | 1 | 92  | 92  | - | 93  | 0 | 93  | 93  | 676.17862 | -0.50 | 0.0672  |
| 1274: | 91  | 1 | 91  | 91  | - | 92  | 0 | 92  | 92  | 677.03539 | -0.50 | 0.0039  |
| 1275: | 90  | 1 | 90  | 90  | - | 91  | 0 | 91  | 91  | 677.88973 | -0.50 | 0.0379  |
| 1276: | 89  | 1 | 89  | 89  | - | 90  | 0 | 90  | 90  | 678.74148 | -0.50 | 0.0134  |
| 1277: | 88  | 1 | 88  | 88  | - | 89  | 0 | 89  | 89  | 679.59092 | -0.50 | 0.2148  |
| 1278: | 87  | 1 | 87  | 87  | - | 88  | 0 | 88  | 88  | 680.43740 | -0.50 | -0.0036 |
| 1279: | 86  | 1 | 86  | 86  | - | 87  | 0 | 87  | 87  | 681.28147 | -0.50 | -0.0875 |
| 1280: | 85  | 1 | 85  | 85  | - | 86  | 0 | 86  | 86  | 682.12302 | -0.50 | -0.1425 |
| 1281: | 84  | 1 | 84  | 84  | - | 85  | 0 | 85  | 85  | 682.96218 | -0.50 | -0.0343 |
| 1282: | 83  | 1 | 83  | 83  | - | 84  | 0 | 84  | 84  | 683.79867 | -0.50 | -0.0386 |
| 1283: | 80  | 1 | 80  | 80  | - | 81  | 0 | 81  | 81  | 686.29287 | -0.50 | 0.0674  |
| 1284: | 79  | 1 | 79  | 79  | - | 80  | 0 | 80  | 80  | 687.11864 | -0.50 | -0.3831 |
| 1285: | 78  | 1 | 78  | 78  | - | 79  | 0 | 79  | 79  | 687.94261 | -0.50 | -0.0543 |
| 1286: | 77  | 1 | 77  | 77  | - | 78  | 0 | 78  | 78  | 688.76370 | -0.50 | -0.0217 |
| 1287: | 76  | 1 | 76  | 76  | - | 77  | 0 | 77  | 77  | 689.58213 | -0.50 | -0.0610 |
| 1288: | 75  | 1 | 75  | 75  | - | 76  | 0 | 76  | 76  | 690.39800 | -0.50 | -0.0678 |
| 1289: | 74  | 1 | 74  | 74  | - | 75  | 0 | 75  | 75  | 691.21126 | -0.50 | -0.0876 |
| 1290: | 73  | 1 | 73  | 73  | - | 74  | 0 | 74  | 74  | 692.02197 | -0.50 | -0.0562 |
| 1291: | 72  | 1 | 72  | 72  | - | 73  | 0 | 73  | 73  | 692.83037 | -0.50 | 0.2711  |
| 1292: | 71  | 1 | 71  | 71  | - | 72  | 0 | 72  | 72  | 693.63552 | -0.50 | -0.0416 |
| 1293: | 70  | 1 | 70  | 70  | - | 71  | 0 | 71  | 71  | 694.43832 | -0.50 | -0.0896 |
| 1294: | 69  | 1 | 69  | 69  | - | 70  | 0 | 70  | 70  | 695.23856 | -0.50 | -0.0786 |
| 1295: | 68  | 1 | 68  | 68  | - | 69  | 0 | 69  | 69  | 696.03624 | -0.50 | -0.0042 |
| 1296: | 67  | 1 | 67  | 67  | - | 68  | 0 | 68  | 68  | 696.83124 | -0.50 | 0.0180  |
| 1297: | 66  | 1 | 66  | 66  | - | 67  | 0 | 67  | 67  | 697.62357 | -0.50 | 0.0027  |
| 1298: | 65  | 1 | 65  | 65  | - | 66  | 0 | 66  | 66  | 698.41314 | -0.50 | -0.1359 |
| 1299: | 64  | 1 | 64  | 64  | - | 65  | 0 | 65  | 65  | 699.20026 | -0.50 | -0.0833 |
| 1300: | 63  | 1 | 63  | 63  | - | 64  | 0 | 64  | 64  | 699.98469 | -0.50 | -0.0750 |
| 1301: | 62  | 1 | 62  | 62  | - | 63  | 0 | 63  | 63  | 700.76646 | -0.50 | -0.0765 |
| 1302: | 61  | 1 | 61  | 61  | - | 62  | 0 | 62  | 62  | 701.54581 | -0.50 | 0.1566  |
| 1303: | 60  | 1 | 60  | 60  | - | 61  | 0 | 61  | 61  | 702.32209 | -0.50 | -0.0211 |
| 1304: | 59  | 1 | 59  | 59  | - | 60  | 0 | 60  | 60  | 703.09587 | -0.50 | -0.0353 |
| 1305: | 58  | 1 | 58  | 58  | - | 59  | 0 | 59  | 59  | 703.86697 | -0.50 | -0.0614 |
| 1306: | 57  | 1 | 57  | 57  | - | 58  | 0 | 58  | 58  | 704.63546 | -0.50 | -0.0249 |
| 1307: | 56  | 1 | 56  | 56  | - | 57  | 0 | 57  | 57  | 705.40116 | -0.50 | -0.1013 |
| 1308: | 55  | 1 | 55  | 55  | - | 56  | 0 | 56  | 56  | 706.16436 | -0.50 | 0.0039  |
| 1309: | 54  | 1 | 54  | 54  | - | 55  | 0 | 55  | 55  | 706.92472 | -0.50 | -0.0449 |
| 1310: | 53  | 1 | 53  | 53  | - | 54  | 0 | 54  | 54  | 707.68254 | -0.50 | 0.0570  |
| 1311: | 52  | 1 | 52  | 52  | - | 53  | 0 | 53  | 53  | 708.43753 | -0.50 | 0.0240  |
| 1312: | 51  | 1 | 51  | 51  | - | 52  | 0 | 52  | 52  | 709.18982 | -0.50 | -0.0093 |
| 1313: | 50  | 1 | 50  | 50  | - | 51  | 0 | 51  | 51  | 709.93957 | -0.50 | 0.1215  |
| 1314: | 48  | 1 | 48  | 48  | - | 49  | 0 | 49  | 49  | 711.43026 | -0.50 | -0.2960 |
| 1315: | 47  | 1 | 47  | 47  | - | 48  | 0 | 48  | 48  | 712.17235 | -0.50 | 0.3146  |
| 1316: | 46  | 1 | 46  | 46  | - | 47  | 0 | 47  | 47  | 712.91099 | -0.50 | 0.1977  |
| 1317: | 45  | 1 | 45  | 45  | - | 46  | 0 | 46  | 46  | 713.64694 | -0.50 | 0.1176  |
| 1318: | 43  | 1 | 43  | 43  | - | 44  | 0 | 44  | 44  | 715.11060 | -0.50 | -0.0834 |
| 1319: | 42  | 1 | 42  | 42  | - | 43  | 0 | 43  | 43  | 715.83845 | -0.50 | -0.0553 |
| 1320: | 41  | 1 | 41  | 41  | - | 42  | 0 | 42  | 42  | 716.56392 | -0.50 | 0.3380  |
| 1321: | 40  | 1 | 40  | 40  | - | 41  | 0 | 41  | 41  | 717.28620 | -0.50 | 0.2911  |
| 1322: | 39  | 1 | 39  | 39  | - | 40  | 0 | 40  | 40  | 718.00555 | -0.50 | 0.0685  |
| 1323: | 38  | 1 | 38  | 38  | - | 39  | 0 | 39  | 39  | 718.72235 | -0.50 | 0.0549  |
| 1324: | 37  | 1 | 37  | 37  | - | 38  | 0 | 38  | 38  | 719.43638 | -0.50 | 0.0349  |
| 1325: | 36  | 1 | 36  | 36  | - | 37  | 0 | 37  | 37  | 720.14760 | -0.50 | -0.0270 |
| 1326: | 35  | 1 | 35  | 35  | - | 36  | 0 | 36  | 36  | 720.85611 | -0.50 | -0.0261 |
| 1327: | 34  | 1 | 34  | 34  | - | 35  | 0 | 35  | 35  | 721.56194 | -0.50 | 0.0722  |
| 1328: | 33  | 1 | 33  | 33  | - | 34  | 0 | 34  | 34  | 722.26438 | -0.50 | -0.4376 |
| 1329: | 32  | 1 | 32  | 32  | - | 33  | 0 | 33  | 33  | 722.96502 | -0.50 | 0.0393  |
| 1330: | 31  | 1 | 31  | 31  | - | 32  | 0 | 32  | 32  | 723.66236 | -0.50 | 0.0074  |
| 1331: | 30  | 1 | 30  | 30  | - | 31  | 0 | 31  | 31  | 724.35693 | -0.50 | 0.0013  |

|       |    |   |    |    |   |    |   |    |    |           |       |         |
|-------|----|---|----|----|---|----|---|----|----|-----------|-------|---------|
| 1332: | 29 | 1 | 29 | 29 | - | 30 | 0 | 30 | 30 | 725.04872 | -0.50 | 0.0158  |
| 1333: | 28 | 1 | 28 | 28 | - | 29 | 0 | 29 | 29 | 725.73768 | -0.50 | 0.0054  |
| 1334: | 27 | 1 | 27 | 27 | - | 28 | 0 | 28 | 28 | 726.42373 | -0.50 | -0.1052 |
| 1335: | 26 | 1 | 26 | 26 | - | 27 | 0 | 27 | 27 | 727.10726 | -0.50 | 0.0786  |
| 1336: | 25 | 1 | 25 | 25 | - | 26 | 0 | 26 | 26 | 727.78788 | -0.50 | 0.1715  |
| 1337: | 24 | 1 | 24 | 24 | - | 25 | 0 | 25 | 25 | 728.46547 | -0.50 | 0.0582  |
| 1338: | 23 | 1 | 23 | 23 | - | 24 | 0 | 24 | 24 | 729.14025 | -0.50 | -0.0367 |
| 1339: | 22 | 1 | 22 | 22 | - | 23 | 0 | 23 | 23 | 729.81230 | -0.50 | -0.0286 |
| 1340: | 21 | 1 | 21 | 21 | - | 22 | 0 | 22 | 22 | 730.48163 | -0.50 | 0.0974  |
| 1341: | 20 | 1 | 20 | 20 | - | 21 | 0 | 21 | 21 | 731.14788 | -0.50 | -0.0143 |
| 1342: | 19 | 1 | 19 | 19 | - | 20 | 0 | 20 | 20 | 731.81153 | -0.50 | 0.1212  |
| 1343: | 18 | 1 | 18 | 18 | - | 19 | 0 | 19 | 19 | 732.47210 | -0.50 | 0.0284  |
| 1344: | 17 | 1 | 17 | 17 | - | 18 | 0 | 18 | 18 | 733.12985 | -0.50 | -0.0278 |
| 1345: | 16 | 1 | 16 | 16 | - | 17 | 0 | 17 | 17 | 733.78453 | -0.50 | -0.2929 |
| 1346: | 15 | 1 | 15 | 15 | - | 16 | 0 | 16 | 16 | 734.43691 | -0.50 | 0.0079  |
| 1347: | 14 | 1 | 14 | 14 | - | 15 | 0 | 15 | 15 | 735.08625 | -0.50 | 0.1394  |
| 1348: | 13 | 1 | 13 | 13 | - | 14 | 0 | 14 | 14 | 735.73246 | -0.50 | 0.0161  |
| 1349: | 12 | 1 | 12 | 12 | - | 13 | 0 | 13 | 13 | 736.37594 | -0.50 | 0.0429  |
| 1350: | 11 | 1 | 11 | 11 | - | 12 | 0 | 12 | 12 | 737.01677 | -0.50 | 0.3044  |
| 1351: | 10 | 1 | 10 | 10 | - | 11 | 0 | 11 | 11 | 737.65417 | -0.50 | 0.0253  |
| 1352: | 9  | 1 | 9  | 9  | - | 10 | 0 | 10 | 10 | 738.28883 | -0.50 | -0.0995 |
| 1353: | 8  | 1 | 8  | 8  | - | 9  | 0 | 9  | 9  | 738.92080 | -0.50 | -0.0154 |
| 1354: | 7  | 1 | 7  | 7  | - | 8  | 0 | 8  | 8  | 739.54960 | -0.50 | -0.1977 |
| 1355: | 6  | 1 | 6  | 6  | - | 7  | 0 | 7  | 7  | 740.17596 | -0.50 | 0.0885  |
| 1356: | 4  | 1 | 4  | 4  | - | 5  | 0 | 5  | 5  | 741.41933 | -0.50 | 0.0550  |
| 1357: | 3  | 1 | 3  | 3  | - | 4  | 0 | 4  | 4  | 742.03658 | -0.50 | -0.0151 |
| 1358: | 2  | 1 | 2  | 2  | - | 3  | 0 | 3  | 3  | 742.65105 | -0.50 | 0.0622  |
| 1359: | 1  | 1 | 1  | 1  | - | 2  | 0 | 2  | 2  | 743.26321 | -0.50 | 0.7617  |
| 1360: | 1  | 1 | 1  | 1  | - | 0  | 0 | 0  | 0  | 745.07927 | -0.50 | 0.0810  |
| 1361: | 2  | 1 | 2  | 2  | - | 1  | 0 | 1  | 1  | 745.67873 | -0.50 | -0.1430 |
| 1362: | 3  | 1 | 3  | 3  | - | 2  | 0 | 2  | 2  | 746.27599 | -0.50 | 0.3891  |
| 1363: | 4  | 1 | 4  | 4  | - | 3  | 0 | 3  | 3  | 746.86932 | -0.50 | -0.0479 |
| 1364: | 5  | 1 | 5  | 5  | - | 4  | 0 | 4  | 4  | 747.46057 | -0.50 | 0.4007  |
| 1365: | 6  | 1 | 6  | 6  | - | 5  | 0 | 5  | 5  | 748.04790 | -0.50 | -0.1002 |
| 1366: | 7  | 1 | 7  | 7  | - | 6  | 0 | 6  | 6  | 748.63288 | -0.50 | 0.0242  |
| 1367: | 8  | 1 | 8  | 8  | - | 7  | 0 | 7  | 7  | 749.21437 | -0.50 | -0.3613 |
| 1368: | 9  | 1 | 9  | 9  | - | 8  | 0 | 8  | 8  | 749.79350 | -0.50 | -0.1218 |
| 1369: | 10 | 1 | 10 | 10 | - | 9  | 0 | 9  | 9  | 750.36950 | -0.50 | -0.0227 |
| 1370: | 11 | 1 | 11 | 11 | - | 10 | 0 | 10 | 10 | 750.94247 | -0.50 | 0.0410  |
| 1371: | 12 | 1 | 12 | 12 | - | 11 | 0 | 11 | 11 | 751.51234 | -0.50 | 0.0041  |
| 1372: | 13 | 1 | 13 | 13 | - | 12 | 0 | 12 | 12 | 752.07933 | -0.50 | 0.0915  |
| 1373: | 14 | 1 | 14 | 14 | - | 13 | 0 | 13 | 13 | 752.64312 | -0.50 | -0.0121 |
| 1374: | 15 | 1 | 15 | 15 | - | 14 | 0 | 14 | 14 | 753.20391 | -0.50 | -0.1018 |
| 1375: | 16 | 1 | 16 | 16 | - | 15 | 0 | 15 | 15 | 753.76185 | -0.50 | -0.0228 |
| 1376: | 17 | 1 | 17 | 17 | - | 16 | 0 | 16 | 16 | 754.31685 | -0.50 | 0.1399  |
| 1377: | 18 | 1 | 18 | 18 | - | 17 | 0 | 17 | 17 | 754.86858 | -0.50 | 0.0611  |
| 1378: | 20 | 1 | 20 | 20 | - | 19 | 0 | 19 | 19 | 755.96303 | -0.50 | -0.0018 |
| 1379: | 21 | 1 | 21 | 21 | - | 20 | 0 | 20 | 20 | 756.50551 | -0.50 | -0.2160 |
| 1380: | 22 | 1 | 22 | 22 | - | 21 | 0 | 21 | 21 | 757.04546 | -0.50 | 0.0876  |
| 1381: | 24 | 1 | 24 | 24 | - | 23 | 0 | 23 | 23 | 758.11552 | -0.50 | 0.0184  |
| 1382: | 25 | 1 | 25 | 25 | - | 24 | 0 | 24 | 24 | 758.64597 | -0.50 | -0.0048 |
| 1383: | 26 | 1 | 26 | 26 | - | 25 | 0 | 25 | 25 | 759.17349 | -0.50 | 0.1096  |
| 1384: | 27 | 1 | 27 | 27 | - | 26 | 0 | 26 | 26 | 759.69764 | -0.50 | -0.0737 |
| 1385: | 28 | 1 | 28 | 28 | - | 27 | 0 | 27 | 27 | 760.21904 | -0.50 | 0.0704  |
| 1386: | 29 | 1 | 29 | 29 | - | 28 | 0 | 28 | 28 | 760.73709 | -0.50 | -0.0534 |
| 1387: | 30 | 1 | 30 | 30 | - | 29 | 0 | 29 | 29 | 761.25157 | -0.50 | -0.6600 |
| 1388: | 31 | 1 | 31 | 31 | - | 30 | 0 | 30 | 30 | 761.76410 | -0.50 | -0.1245 |
| 1389: | 32 | 1 | 32 | 32 | - | 31 | 0 | 31 | 31 | 762.27301 | -0.50 | -0.1121 |
| 1390: | 33 | 1 | 33 | 33 | - | 32 | 0 | 32 | 32 | 762.77893 | -0.50 | 0.0122  |
| 1391: | 34 | 1 | 34 | 34 | - | 33 | 0 | 33 | 33 | 763.28151 | -0.50 | -0.0966 |
| 1392: | 36 | 1 | 36 | 36 | - | 35 | 0 | 35 | 35 | 764.27781 | -0.50 | 0.1660  |
| 1393: | 37 | 1 | 37 | 37 | - | 36 | 0 | 36 | 36 | 764.77103 | -0.50 | 0.0474  |
| 1394: | 38 | 1 | 38 | 38 | - | 37 | 0 | 37 | 37 | 765.26127 | -0.50 | 0.0754  |
| 1395: | 39 | 1 | 39 | 39 | - | 38 | 0 | 38 | 38 | 765.74832 | -0.50 | 0.0449  |
| 1396: | 40 | 1 | 40 | 40 | - | 39 | 0 | 39 | 39 | 766.23211 | -0.50 | -0.1090 |
| 1397: | 41 | 1 | 41 | 41 | - | 40 | 0 | 40 | 40 | 766.71305 | -0.50 | 0.0286  |
| 1398: | 42 | 1 | 42 | 42 | - | 41 | 0 | 41 | 41 | 767.19069 | -0.50 | 0.0127  |
| 1399: | 43 | 1 | 43 | 43 | - | 42 | 0 | 42 | 42 | 767.66519 | -0.50 | 0.0083  |
| 1400: | 44 | 1 | 44 | 44 | - | 43 | 0 | 43 | 43 | 768.13631 | -0.50 | -0.2196 |
| 1401: | 45 | 1 | 45 | 45 | - | 44 | 0 | 44 | 44 | 768.60471 | -0.50 | -0.0062 |
| 1402: | 47 | 1 | 47 | 47 | - | 46 | 0 | 46 | 46 | 769.53146 | -0.50 | -0.1249 |

|       |     |   |     |     |   |     |   |     |     |           |       |         |
|-------|-----|---|-----|-----|---|-----|---|-----|-----|-----------|-------|---------|
| 1403: | 48  | 1 | 48  | 48  | - | 47  | 0 | 47  | 47  | 769.99026 | -0.50 | 0.0029  |
| 1404: | 49  | 1 | 49  | 49  | - | 48  | 0 | 48  | 48  | 770.44577 | -0.50 | 0.0222  |
| 1405: | 50  | 1 | 50  | 50  | - | 49  | 0 | 49  | 49  | 770.89809 | -0.50 | 0.0379  |
| 1406: | 51  | 1 | 51  | 51  | - | 50  | 0 | 50  | 50  | 771.34719 | -0.50 | 0.0251  |
| 1407: | 52  | 1 | 52  | 52  | - | 51  | 0 | 51  | 51  | 771.79302 | -0.50 | -0.0612 |
| 1408: | 53  | 1 | 53  | 53  | - | 52  | 0 | 52  | 52  | 772.23584 | -0.50 | 0.0440  |
| 1409: | 54  | 1 | 54  | 54  | - | 53  | 0 | 53  | 53  | 772.67533 | -0.50 | 0.0258  |
| 1410: | 55  | 1 | 55  | 55  | - | 54  | 0 | 54  | 54  | 773.11143 | -0.50 | -0.1708 |
| 1411: | 56  | 1 | 56  | 56  | - | 55  | 0 | 55  | 55  | 773.54469 | -0.50 | 0.0093  |
| 1412: | 57  | 1 | 57  | 57  | - | 56  | 0 | 56  | 56  | 773.97454 | -0.50 | 0.0011  |
| 1413: | 58  | 1 | 58  | 58  | - | 57  | 0 | 57  | 57  | 774.40122 | -0.50 | 0.0497  |
| 1414: | 60  | 1 | 60  | 60  | - | 59  | 0 | 59  | 59  | 775.24469 | -0.50 | -0.0425 |
| 1415: | 61  | 1 | 61  | 61  | - | 60  | 0 | 60  | 60  | 775.66164 | -0.50 | -0.0132 |
| 1416: | 63  | 1 | 63  | 63  | - | 62  | 0 | 62  | 62  | 776.48561 | -0.50 | -0.1384 |
| 1417: | 64  | 1 | 64  | 64  | - | 63  | 0 | 63  | 63  | 776.89291 | -0.50 | -0.0027 |
| 1418: | 65  | 1 | 65  | 65  | - | 64  | 0 | 64  | 64  | 777.29679 | -0.50 | -0.0247 |
| 1419: | 66  | 1 | 66  | 66  | - | 65  | 0 | 65  | 65  | 777.69741 | -0.50 | -0.0392 |
| 1420: | 67  | 1 | 67  | 67  | - | 66  | 0 | 66  | 66  | 778.09481 | -0.50 | -0.0012 |
| 1421: | 68  | 1 | 68  | 68  | - | 67  | 0 | 67  | 67  | 778.48889 | -0.50 | -0.0056 |
| 1422: | 69  | 1 | 69  | 69  | - | 68  | 0 | 68  | 68  | 778.87972 | -0.50 | 0.0228  |
| 1423: | 70  | 1 | 70  | 70  | - | 69  | 0 | 69  | 69  | 779.26698 | -0.50 | -0.2309 |
| 1424: | 71  | 1 | 71  | 71  | - | 70  | 0 | 70  | 70  | 779.65146 | -0.50 | 0.0284  |
| 1425: | 72  | 1 | 72  | 72  | - | 71  | 0 | 71  | 71  | 780.03231 | -0.50 | -0.0441 |
| 1426: | 73  | 1 | 73  | 73  | - | 72  | 0 | 72  | 72  | 780.41000 | -0.50 | 0.0266  |
| 1427: | 74  | 1 | 74  | 74  | - | 73  | 0 | 73  | 73  | 780.78458 | -0.50 | 0.2958  |
| 1428: | 75  | 1 | 75  | 75  | - | 74  | 0 | 74  | 74  | 781.15532 | -0.50 | 0.0386  |
| 1429: | 76  | 1 | 76  | 76  | - | 75  | 0 | 75  | 75  | 781.52287 | -0.50 | -0.0898 |
| 1430: | 77  | 1 | 77  | 77  | - | 76  | 0 | 76  | 76  | 781.88714 | -0.50 | -0.1744 |
| 1431: | 78  | 1 | 78  | 78  | - | 77  | 0 | 77  | 77  | 782.24834 | -0.50 | 0.0002  |
| 1432: | 79  | 1 | 79  | 79  | - | 78  | 0 | 78  | 78  | 782.60605 | -0.50 | 0.0190  |
| 1433: | 80  | 1 | 80  | 80  | - | 79  | 0 | 79  | 79  | 782.96045 | -0.50 | 0.0672  |
| 1434: | 82  | 1 | 82  | 82  | - | 81  | 0 | 81  | 81  | 783.65902 | -0.50 | -0.0272 |
| 1435: | 83  | 1 | 83  | 83  | - | 82  | 0 | 82  | 82  | 784.00343 | -0.50 | 0.0806  |
| 1436: | 84  | 1 | 84  | 84  | - | 83  | 0 | 83  | 83  | 784.34426 | -0.50 | -0.0314 |
| 1437: | 85  | 1 | 85  | 85  | - | 84  | 0 | 84  | 84  | 784.68194 | -0.50 | 0.0721  |
| 1438: | 86  | 1 | 86  | 86  | - | 85  | 0 | 85  | 85  | 785.01613 | -0.50 | 0.0563  |
| 1439: | 87  | 1 | 87  | 87  | - | 86  | 0 | 86  | 86  | 785.34698 | -0.50 | 0.0763  |
| 1440: | 88  | 1 | 88  | 88  | - | 87  | 0 | 87  | 87  | 785.67434 | -0.50 | -0.0125 |
| 1441: | 89  | 1 | 89  | 89  | - | 88  | 0 | 88  | 88  | 785.99833 | -0.50 | -0.0849 |
| 1442: | 90  | 1 | 90  | 90  | - | 89  | 0 | 89  | 89  | 786.31946 | -0.50 | 0.3743  |
| 1443: | 92  | 1 | 92  | 92  | - | 91  | 0 | 91  | 91  | 786.95052 | -0.50 | 0.2886  |
| 1444: | 94  | 1 | 94  | 94  | - | 93  | 0 | 93  | 93  | 787.56778 | -0.50 | 0.0325  |
| 1445: | 95  | 1 | 95  | 95  | - | 94  | 0 | 94  | 94  | 787.87125 | -0.50 | -0.1312 |
| 1446: | 96  | 1 | 96  | 96  | - | 95  | 0 | 95  | 95  | 788.17148 | -0.50 | -0.1117 |
| 1447: | 97  | 1 | 97  | 97  | - | 96  | 0 | 96  | 96  | 788.46845 | -0.50 | 0.0763  |
| 1448: | 98  | 1 | 98  | 98  | - | 97  | 0 | 97  | 97  | 788.76162 | -0.50 | -0.1018 |
| 1449: | 100 | 1 | 100 | 100 | - | 99  | 0 | 99  | 99  | 789.33820 | -0.50 | 0.1046  |
| 1450: | 101 | 1 | 101 | 101 | - | 100 | 0 | 100 | 100 | 789.62105 | -0.50 | -0.0601 |
| 1451: | 102 | 1 | 102 | 102 | - | 101 | 0 | 101 | 101 | 789.90078 | -0.50 | 0.1102  |
| 1452: | 103 | 1 | 103 | 103 | - | 102 | 0 | 102 | 102 | 790.17716 | -0.50 | 0.3910  |
| 1453: | 104 | 1 | 104 | 104 | - | 103 | 0 | 103 | 103 | 790.44948 | -0.50 | 0.0776  |
| 1454: | 105 | 1 | 105 | 105 | - | 104 | 0 | 104 | 104 | 790.71868 | -0.50 | 0.1153  |
| 1455: | 106 | 1 | 106 | 106 | - | 105 | 0 | 105 | 105 | 790.98420 | -0.50 | -0.0505 |
| 1456: | 109 | 1 | 109 | 109 | - | 108 | 0 | 108 | 108 | 791.76054 | -0.50 | 0.1446  |
| 1457: | 110 | 1 | 110 | 110 | - | 109 | 0 | 109 | 109 | 792.01222 | -0.50 | 0.0984  |
| 1458: | 111 | 1 | 111 | 111 | - | 110 | 0 | 110 | 110 | 792.26032 | -0.50 | -0.0244 |
| 1459: | 112 | 1 | 112 | 112 | - | 111 | 0 | 111 | 111 | 792.50504 | -0.50 | -0.0184 |
| 1460: | 113 | 1 | 113 | 113 | - | 112 | 0 | 112 | 112 | 792.74629 | -0.50 | 0.0318  |
| 1461: | 114 | 1 | 114 | 114 | - | 113 | 0 | 113 | 113 | 792.98397 | -0.50 | 0.0315  |
| 1462: | 115 | 1 | 115 | 115 | - | 114 | 0 | 114 | 114 | 793.21826 | -0.50 | 0.1663  |
| 1463: | 116 | 1 | 116 | 116 | - | 115 | 0 | 115 | 115 | 793.44896 | -0.50 | 0.2416  |
| 1464: | 117 | 1 | 117 | 117 | - | 116 | 0 | 116 | 116 | 793.67563 | -0.50 | -0.1773 |
| 1465: | 118 | 1 | 118 | 118 | - | 117 | 0 | 117 | 117 | 793.89960 | -0.50 | 0.2452  |
| 1466: | 119 | 1 | 119 | 119 | - | 118 | 0 | 118 | 118 | 794.11937 | -0.50 | 0.0145  |
| 1467: | 120 | 1 | 120 | 120 | - | 119 | 0 | 119 | 119 | 794.33587 | -0.50 | 0.0661  |
| 1468: | 121 | 1 | 121 | 121 | - | 120 | 0 | 120 | 120 | 794.54857 | -0.50 | -0.1247 |
| 1469: | 122 | 1 | 122 | 122 | - | 121 | 0 | 121 | 121 | 794.75785 | -0.50 | -0.1722 |
| 1470: | 123 | 1 | 123 | 123 | - | 122 | 0 | 122 | 122 | 794.96395 | -0.50 | 0.1690  |
| 1471: | 124 | 1 | 124 | 124 | - | 123 | 0 | 123 | 123 | 795.16564 | -0.50 | -0.3256 |
| 1472: | 125 | 1 | 125 | 125 | - | 124 | 0 | 124 | 124 | 795.36448 | -0.50 | -0.0906 |
| 1473: | 126 | 1 | 126 | 126 | - | 125 | 0 | 125 | 125 | 795.55974 | -0.50 | 0.1497  |

|       |     |   |     |     |   |     |   |     |     |           |       |         |
|-------|-----|---|-----|-----|---|-----|---|-----|-----|-----------|-------|---------|
| 1474: | 127 | 1 | 127 | 127 | - | 126 | 0 | 126 | 126 | 795.75116 | -0.50 | 0.1407  |
| 1475: | 128 | 1 | 128 | 128 | - | 127 | 0 | 127 | 127 | 795.93909 | -0.50 | 0.2379  |
| 1476: | 129 | 1 | 129 | 129 | - | 128 | 0 | 128 | 128 | 796.12259 | -0.50 | -0.4930 |
| 1477: | 130 | 1 | 130 | 130 | - | 129 | 0 | 129 | 129 | 796.30328 | -0.50 | -0.4267 |
| 1478: | 131 | 1 | 131 | 131 | - | 130 | 0 | 130 | 130 | 796.48017 | -0.50 | -0.5474 |
| 1479: | 132 | 1 | 132 | 132 | - | 131 | 0 | 131 | 131 | 796.65372 | -0.50 | -0.3897 |
| 1480: | 133 | 1 | 133 | 133 | - | 132 | 0 | 132 | 132 | 796.82468 | -0.50 | 0.8020  |
| 1481: | 134 | 1 | 134 | 134 | - | 133 | 0 | 133 | 133 | 796.98960 | -0.50 | -0.4166 |
| 1482: | 135 | 1 | 135 | 135 | - | 134 | 0 | 134 | 134 | 797.15295 | -0.50 | 0.4299  |
| 1483: | 136 | 1 | 136 | 136 | - | 135 | 0 | 135 | 135 | 797.31201 | -0.50 | 0.6272  |
| 1484: | 137 | 1 | 137 | 137 | - | 136 | 0 | 136 | 136 | 797.46671 | -0.50 | 0.1110  |
| 1485: | 139 | 1 | 139 | 139 | - | 138 | 0 | 138 | 138 | 797.76629 | -0.50 | 0.2200  |
| 1486: | 122 | 2 | 122 | 122 | - | 123 | 1 | 123 | 123 | 644.51626 | -0.50 | -0.1566 |
| 1487: | 121 | 2 | 121 | 121 | - | 122 | 1 | 122 | 122 | 645.44420 | -0.50 | -0.0005 |
| 1488: | 120 | 2 | 120 | 120 | - | 121 | 1 | 121 | 121 | 646.36912 | -0.50 | -0.4622 |
| 1489: | 119 | 2 | 119 | 119 | - | 120 | 1 | 120 | 120 | 647.29212 | -0.50 | -0.4378 |
| 1490: | 117 | 2 | 117 | 117 | - | 118 | 1 | 118 | 118 | 649.13080 | -0.50 | -0.4739 |
| 1491: | 116 | 2 | 116 | 116 | - | 117 | 1 | 117 | 117 | 650.04718 | -0.50 | 0.1738  |
| 1492: | 115 | 2 | 115 | 115 | - | 116 | 1 | 116 | 116 | 650.96036 | -0.50 | 0.0440  |
| 1493: | 114 | 2 | 114 | 114 | - | 115 | 1 | 115 | 115 | 651.87134 | -0.50 | 0.1409  |
| 1494: | 113 | 2 | 113 | 113 | - | 114 | 1 | 114 | 114 | 652.77944 | -0.50 | -0.2113 |
| 1495: | 112 | 2 | 112 | 112 | - | 113 | 1 | 113 | 113 | 653.68572 | -0.50 | 0.0515  |
| 1496: | 111 | 2 | 111 | 111 | - | 112 | 1 | 112 | 112 | 654.58927 | -0.50 | 0.0234  |
| 1497: | 110 | 2 | 110 | 110 | - | 111 | 1 | 111 | 111 | 655.49039 | -0.50 | 0.0086  |
| 1498: | 109 | 2 | 109 | 109 | - | 110 | 1 | 110 | 110 | 656.38922 | -0.50 | 0.1512  |
| 1499: | 108 | 2 | 108 | 108 | - | 109 | 1 | 109 | 109 | 657.28523 | -0.50 | -0.0745 |
| 1500: | 107 | 2 | 107 | 107 | - | 108 | 1 | 108 | 108 | 658.17927 | -0.50 | 0.1855  |
| 1501: | 106 | 2 | 106 | 106 | - | 107 | 1 | 107 | 107 | 659.07057 | -0.50 | 0.1654  |
| 1502: | 105 | 2 | 105 | 105 | - | 106 | 1 | 106 | 106 | 659.95925 | -0.50 | -0.0105 |
| 1503: | 104 | 2 | 104 | 104 | - | 105 | 1 | 105 | 105 | 660.84645 | -0.50 | 0.8020  |
| 1504: | 103 | 2 | 103 | 103 | - | 104 | 1 | 104 | 104 | 661.72952 | -0.50 | -0.0430 |
| 1505: | 102 | 2 | 102 | 102 | - | 103 | 1 | 103 | 103 | 662.61112 | -0.50 | 0.1187  |
| 1506: | 101 | 2 | 101 | 101 | - | 102 | 1 | 102 | 102 | 663.49008 | -0.50 | 0.1214  |
| 1507: | 100 | 2 | 100 | 100 | - | 101 | 1 | 101 | 101 | 664.36646 | -0.50 | 0.0293  |
| 1508: | 99  | 2 | 99  | 99  | - | 100 | 1 | 100 | 100 | 665.24059 | -0.50 | 0.1766  |
| 1509: | 98  | 2 | 98  | 98  | - | 99  | 1 | 99  | 99  | 666.11188 | -0.50 | -0.0224 |
| 1510: | 97  | 2 | 97  | 97  | - | 98  | 1 | 98  | 98  | 666.98078 | -0.50 | -0.1136 |
| 1511: | 96  | 2 | 96  | 96  | - | 97  | 1 | 97  | 97  | 667.84739 | -0.50 | 0.0075  |
| 1512: | 95  | 2 | 95  | 95  | - | 96  | 1 | 96  | 96  | 668.71123 | -0.50 | -0.1351 |
| 1513: | 94  | 2 | 94  | 94  | - | 95  | 1 | 95  | 95  | 669.57283 | -0.50 | -0.0070 |
| 1514: | 93  | 2 | 93  | 93  | - | 94  | 1 | 94  | 94  | 670.43191 | -0.50 | 0.1160  |
| 1515: | 92  | 2 | 92  | 92  | - | 93  | 1 | 93  | 93  | 671.28849 | -0.50 | 0.2583  |
| 1516: | 91  | 2 | 91  | 91  | - | 92  | 1 | 92  | 92  | 672.14218 | -0.50 | 0.0341  |
| 1517: | 90  | 2 | 90  | 90  | - | 91  | 1 | 91  | 91  | 672.99354 | -0.50 | 0.0077  |
| 1518: | 89  | 2 | 89  | 89  | - | 90  | 1 | 90  | 90  | 673.84247 | -0.50 | 0.0834  |
| 1519: | 88  | 2 | 88  | 88  | - | 89  | 1 | 89  | 89  | 674.68870 | -0.50 | -0.0046 |
| 1520: | 87  | 2 | 87  | 87  | - | 88  | 1 | 88  | 88  | 675.53258 | -0.50 | 0.0982  |
| 1521: | 86  | 2 | 86  | 86  | - | 87  | 1 | 87  | 87  | 676.37367 | -0.50 | -0.0439 |
| 1522: | 85  | 2 | 85  | 85  | - | 86  | 1 | 86  | 86  | 677.21233 | -0.50 | -0.0668 |
| 1523: | 84  | 2 | 84  | 84  | - | 85  | 1 | 85  | 85  | 678.04857 | -0.50 | 0.0441  |
| 1524: | 83  | 2 | 83  | 83  | - | 84  | 1 | 84  | 84  | 678.88214 | -0.50 | 0.0430  |
| 1525: | 82  | 2 | 82  | 82  | - | 83  | 1 | 83  | 83  | 679.71334 | -0.50 | 0.2342  |
| 1526: | 81  | 2 | 81  | 81  | - | 82  | 1 | 82  | 82  | 680.54156 | -0.50 | 0.0122  |
| 1527: | 80  | 2 | 80  | 80  | - | 81  | 1 | 81  | 81  | 681.36718 | -0.50 | -0.2388 |
| 1528: | 79  | 2 | 79  | 79  | - | 80  | 1 | 80  | 80  | 682.19067 | -0.50 | -0.0443 |
| 1529: | 78  | 2 | 78  | 78  | - | 79  | 1 | 79  | 79  | 683.01147 | -0.50 | 0.0399  |
| 1530: | 77  | 2 | 77  | 77  | - | 78  | 1 | 78  | 78  | 683.82954 | -0.50 | -0.0216 |
| 1531: | 76  | 2 | 76  | 76  | - | 77  | 1 | 77  | 77  | 684.64501 | -0.50 | -0.0947 |
| 1532: | 74  | 2 | 74  | 74  | - | 75  | 1 | 75  | 75  | 686.26856 | -0.50 | 0.1525  |
| 1533: | 73  | 2 | 73  | 73  | - | 74  | 1 | 74  | 74  | 687.07611 | -0.50 | -0.0485 |
| 1534: | 72  | 2 | 72  | 72  | - | 73  | 1 | 73  | 73  | 687.88129 | -0.50 | -0.0135 |
| 1535: | 71  | 2 | 71  | 71  | - | 72  | 1 | 72  | 72  | 688.68387 | -0.50 | 0.0322  |
| 1536: | 70  | 2 | 70  | 70  | - | 71  | 1 | 71  | 71  | 689.48373 | -0.50 | -0.0272 |
| 1537: | 69  | 2 | 69  | 69  | - | 70  | 1 | 70  | 70  | 690.28103 | -0.50 | -0.0273 |
| 1538: | 68  | 2 | 68  | 68  | - | 69  | 1 | 69  | 69  | 691.07545 | -0.50 | -0.2835 |
| 1539: | 67  | 2 | 67  | 67  | - | 68  | 1 | 68  | 68  | 691.86781 | -0.50 | 0.0285  |
| 1540: | 66  | 2 | 66  | 66  | - | 67  | 1 | 67  | 67  | 692.65705 | -0.50 | -0.1469 |
| 1541: | 65  | 2 | 65  | 65  | - | 66  | 1 | 66  | 66  | 693.44388 | -0.50 | -0.0951 |
| 1542: | 64  | 2 | 64  | 64  | - | 65  | 1 | 65  | 65  | 694.22834 | -0.50 | 0.2283  |
| 1543: | 63  | 2 | 63  | 63  | - | 64  | 1 | 64  | 64  | 695.00962 | -0.50 | 0.0176  |
| 1544: | 62  | 2 | 62  | 62  | - | 63  | 1 | 63  | 63  | 695.78830 | -0.50 | -0.1425 |

|       |    |   |    |    |   |    |   |    |    |           |       |         |
|-------|----|---|----|----|---|----|---|----|----|-----------|-------|---------|
| 1545: | 61 | 2 | 61 | 61 | - | 62 | 1 | 62 | 62 | 696.56480 | -0.50 | 0.1723  |
| 1546: | 60 | 2 | 60 | 60 | - | 61 | 1 | 61 | 61 | 697.33814 | -0.50 | -0.0134 |
| 1547: | 59 | 2 | 59 | 59 | - | 60 | 1 | 60 | 60 | 698.10904 | -0.50 | 0.0247  |
| 1548: | 58 | 2 | 58 | 58 | - | 59 | 1 | 59 | 59 | 698.87724 | -0.50 | 0.0312  |
| 1549: | 57 | 2 | 57 | 57 | - | 58 | 1 | 58 | 58 | 699.64270 | -0.50 | -0.0293 |
| 1550: | 56 | 2 | 56 | 56 | - | 57 | 1 | 57 | 57 | 700.40553 | -0.50 | -0.0426 |
| 1551: | 55 | 2 | 55 | 55 | - | 56 | 1 | 56 | 56 | 701.16576 | -0.50 | 0.0261  |
| 1552: | 54 | 2 | 54 | 54 | - | 55 | 1 | 55 | 55 | 701.92323 | -0.50 | 0.0211  |
| 1553: | 53 | 2 | 53 | 53 | - | 54 | 1 | 54 | 54 | 702.67798 | -0.50 | -0.0130 |
| 1554: | 52 | 2 | 52 | 52 | - | 53 | 1 | 53 | 53 | 703.42987 | -0.50 | -0.2117 |
| 1555: | 51 | 2 | 51 | 51 | - | 52 | 1 | 52 | 52 | 704.17957 | -0.50 | 0.0996  |
| 1556: | 50 | 2 | 50 | 50 | - | 51 | 1 | 51 | 51 | 704.92615 | -0.50 | -0.0047 |
| 1557: | 49 | 2 | 49 | 49 | - | 50 | 1 | 50 | 50 | 705.67011 | -0.50 | -0.0201 |
| 1558: | 48 | 2 | 48 | 48 | - | 49 | 1 | 49 | 49 | 706.41157 | -0.50 | 0.1781  |
| 1559: | 47 | 2 | 47 | 47 | - | 48 | 1 | 48 | 48 | 707.15019 | -0.50 | 0.2544  |
| 1560: | 46 | 2 | 46 | 46 | - | 47 | 1 | 47 | 47 | 707.88580 | -0.50 | 0.0433  |
| 1561: | 45 | 2 | 45 | 45 | - | 46 | 1 | 46 | 46 | 708.61867 | -0.50 | -0.1807 |
| 1562: | 44 | 2 | 44 | 44 | - | 45 | 1 | 45 | 45 | 709.34957 | -0.50 | 0.3571  |
| 1563: | 43 | 2 | 43 | 43 | - | 44 | 1 | 44 | 44 | 710.07691 | -0.50 | 0.0711  |
| 1564: | 42 | 2 | 42 | 42 | - | 43 | 1 | 43 | 43 | 710.80212 | -0.50 | 0.3960  |
| 1565: | 41 | 2 | 41 | 41 | - | 42 | 1 | 42 | 42 | 711.52420 | -0.50 | 0.3364  |
| 1566: | 40 | 2 | 40 | 40 | - | 41 | 1 | 41 | 41 | 712.24410 | -0.50 | 0.8467  |
| 1567: | 39 | 2 | 39 | 39 | - | 40 | 1 | 40 | 40 | 712.96028 | -0.50 | 0.3917  |
| 1568: | 38 | 2 | 38 | 38 | - | 39 | 1 | 39 | 39 | 713.67396 | -0.50 | 0.1958  |
| 1569: | 36 | 2 | 36 | 36 | - | 37 | 1 | 37 | 37 | 715.09302 | -0.50 | -0.2000 |
| 1570: | 35 | 2 | 35 | 35 | - | 36 | 1 | 36 | 36 | 715.79908 | -0.50 | 0.2892  |
| 1571: | 34 | 2 | 34 | 34 | - | 35 | 1 | 35 | 35 | 716.50135 | -0.50 | -0.2339 |
| 1572: | 33 | 2 | 33 | 33 | - | 34 | 1 | 34 | 34 | 717.20152 | -0.50 | -0.0748 |
| 1573: | 31 | 2 | 31 | 31 | - | 32 | 1 | 32 | 32 | 718.59313 | -0.50 | -0.1216 |
| 1574: | 30 | 2 | 30 | 30 | - | 31 | 1 | 31 | 31 | 719.28488 | -0.50 | -0.0082 |
| 1575: | 29 | 2 | 29 | 29 | - | 30 | 1 | 30 | 30 | 719.97376 | -0.50 | 0.0359  |
| 1576: | 28 | 2 | 28 | 28 | - | 29 | 1 | 29 | 29 | 720.66005 | -0.50 | 0.2954  |
| 1577: | 27 | 2 | 27 | 27 | - | 28 | 1 | 28 | 28 | 721.34298 | -0.50 | 0.0049  |
| 1578: | 26 | 2 | 26 | 26 | - | 27 | 1 | 27 | 27 | 722.02344 | -0.50 | 0.0590  |
| 1579: | 25 | 2 | 25 | 25 | - | 26 | 1 | 26 | 26 | 722.70099 | -0.50 | 0.0224  |
| 1580: | 24 | 2 | 24 | 24 | - | 25 | 1 | 25 | 25 | 723.37573 | -0.50 | -0.0002 |
| 1581: | 23 | 2 | 23 | 23 | - | 24 | 1 | 24 | 24 | 724.04758 | -0.50 | -0.0842 |
| 1582: | 22 | 2 | 22 | 22 | - | 23 | 1 | 23 | 23 | 724.71661 | -0.50 | -0.1549 |
| 1583: | 21 | 2 | 21 | 21 | - | 22 | 1 | 22 | 22 | 725.38267 | -0.50 | -0.3576 |
| 1584: | 20 | 2 | 20 | 20 | - | 21 | 1 | 21 | 21 | 726.04636 | -0.50 | -0.0877 |
| 1585: | 19 | 2 | 19 | 19 | - | 20 | 1 | 20 | 20 | 726.70694 | -0.50 | -0.0804 |
| 1586: | 18 | 2 | 18 | 18 | - | 19 | 1 | 19 | 19 | 727.36455 | -0.50 | -0.1912 |
| 1587: | 17 | 2 | 17 | 17 | - | 18 | 1 | 18 | 18 | 728.01910 | -0.50 | -0.5052 |
| 1588: | 16 | 2 | 16 | 16 | - | 17 | 1 | 17 | 17 | 728.67154 | -0.50 | -0.0679 |
| 1589: | 15 | 2 | 15 | 15 | - | 16 | 1 | 16 | 16 | 729.32088 | -0.50 | 0.1356  |
| 1590: | 14 | 2 | 14 | 14 | - | 15 | 1 | 15 | 15 | 729.96699 | -0.50 | -0.0201 |
| 1591: | 13 | 2 | 13 | 13 | - | 14 | 1 | 14 | 14 | 730.61045 | -0.50 | 0.0497  |
| 1592: | 12 | 2 | 12 | 12 | - | 13 | 1 | 13 | 13 | 731.25113 | -0.50 | 0.2198  |
| 1593: | 11 | 2 | 11 | 11 | - | 12 | 1 | 12 | 12 | 731.88842 | -0.50 | -0.1151 |
| 1594: | 10 | 2 | 10 | 10 | - | 11 | 1 | 11 | 11 | 732.52289 | -0.50 | -0.3804 |
| 1595: | 9  | 2 | 9  | 9  | - | 10 | 1 | 10 | 10 | 733.15513 | -0.50 | 0.0188  |
| 1596: | 8  | 2 | 8  | 8  | - | 9  | 1 | 9  | 9  | 733.78453 | -0.50 | 0.4771  |
| 1597: | 7  | 2 | 7  | 7  | - | 8  | 1 | 8  | 8  | 734.41006 | -0.50 | -0.0307 |
| 1598: | 6  | 2 | 6  | 6  | - | 7  | 1 | 7  | 7  | 735.03328 | -0.50 | 0.0602  |
| 1599: | 5  | 2 | 5  | 5  | - | 6  | 1 | 6  | 6  | 735.65332 | -0.50 | -0.1155 |
| 1600: | 4  | 2 | 4  | 4  | - | 5  | 1 | 5  | 5  | 736.27083 | -0.50 | 0.0969  |
| 1601: | 3  | 2 | 3  | 3  | - | 4  | 1 | 4  | 4  | 736.88505 | -0.50 | -0.0578 |
| 1602: | 1  | 2 | 1  | 1  | - | 2  | 1 | 2  | 2  | 738.10493 | -0.50 | -0.1393 |
| 1603: | 0  | 2 | 0  | 0  | - | 1  | 1 | 1  | 1  | 738.71045 | -0.50 | -0.1966 |
| 1604: | 2  | 2 | 2  | 2  | - | 1  | 1 | 1  | 1  | 740.50961 | -0.50 | -0.0973 |
| 1605: | 3  | 2 | 3  | 3  | - | 2  | 1 | 2  | 2  | 741.10332 | -0.50 | -0.1679 |
| 1606: | 4  | 2 | 4  | 4  | - | 3  | 1 | 3  | 3  | 741.69403 | -0.50 | -0.2773 |
| 1607: | 5  | 2 | 5  | 5  | - | 4  | 1 | 4  | 4  | 742.28212 | -0.50 | -0.0407 |
| 1608: | 6  | 2 | 6  | 6  | - | 5  | 1 | 5  | 5  | 742.86665 | -0.50 | -0.3934 |
| 1609: | 7  | 2 | 7  | 7  | - | 6  | 1 | 6  | 6  | 743.44874 | -0.50 | -0.2104 |
| 1610: | 8  | 2 | 8  | 8  | - | 7  | 1 | 7  | 7  | 744.02785 | -0.50 | -0.0271 |
| 1611: | 9  | 2 | 9  | 9  | - | 8  | 1 | 8  | 8  | 744.60379 | -0.50 | -0.0285 |
| 1612: | 10 | 2 | 10 | 10 | - | 9  | 1 | 9  | 9  | 745.17680 | -0.50 | 0.0302  |
| 1613: | 11 | 2 | 11 | 11 | - | 10 | 1 | 10 | 10 | 745.74694 | -0.50 | 0.2137  |
| 1614: | 12 | 2 | 12 | 12 | - | 11 | 1 | 11 | 11 | 746.31362 | -0.50 | -0.0631 |
| 1615: | 13 | 2 | 13 | 13 | - | 12 | 1 | 12 | 12 | 746.87797 | -0.50 | 0.3348  |

|       |    |   |    |    |   |    |   |    |    |           |       |         |
|-------|----|---|----|----|---|----|---|----|----|-----------|-------|---------|
| 1616: | 14 | 2 | 14 | 14 | - | 13 | 1 | 13 | 13 | 747.43839 | -0.50 | -0.1880 |
| 1617: | 16 | 2 | 16 | 16 | - | 15 | 1 | 15 | 15 | 748.55142 | -0.50 | 0.0041  |
| 1618: | 17 | 2 | 17 | 17 | - | 16 | 1 | 16 | 16 | 749.10335 | -0.50 | 0.0487  |
| 1619: | 18 | 2 | 18 | 18 | - | 17 | 1 | 17 | 17 | 749.65212 | -0.50 | -0.0378 |
| 1620: | 19 | 2 | 19 | 19 | - | 18 | 1 | 18 | 18 | 750.19797 | -0.50 | -0.0107 |
| 1621: | 20 | 2 | 20 | 20 | - | 19 | 1 | 19 | 19 | 750.74062 | -0.50 | -0.1449 |
| 1622: | 21 | 2 | 21 | 21 | - | 20 | 1 | 20 | 20 | 751.28049 | -0.50 | -0.0157 |
| 1623: | 23 | 2 | 23 | 23 | - | 22 | 1 | 22 | 22 | 752.35087 | -0.50 | 0.0328  |
| 1624: | 24 | 2 | 24 | 24 | - | 23 | 1 | 23 | 23 | 752.88160 | -0.50 | 0.1818  |
| 1625: | 25 | 2 | 25 | 25 | - | 24 | 1 | 24 | 24 | 753.40894 | -0.50 | 0.0038  |
| 1626: | 26 | 2 | 26 | 26 | - | 25 | 1 | 25 | 25 | 753.93329 | -0.50 | -0.0962 |
| 1627: | 27 | 2 | 27 | 27 | - | 26 | 1 | 26 | 26 | 754.45481 | -0.50 | 0.0466  |
| 1628: | 29 | 2 | 29 | 29 | - | 28 | 1 | 28 | 28 | 755.48822 | -0.50 | -0.0594 |
| 1629: | 30 | 2 | 30 | 30 | - | 29 | 1 | 29 | 29 | 756.00042 | -0.50 | 0.0115  |
| 1630: | 32 | 2 | 32 | 32 | - | 31 | 1 | 31 | 31 | 757.01521 | -0.50 | -0.1741 |
| 1631: | 33 | 2 | 33 | 33 | - | 32 | 1 | 32 | 32 | 757.51812 | -0.50 | -0.1007 |
| 1632: | 34 | 2 | 34 | 34 | - | 33 | 1 | 33 | 33 | 758.01805 | -0.50 | 0.1000  |
| 1633: | 35 | 2 | 35 | 35 | - | 34 | 1 | 34 | 34 | 758.51460 | -0.50 | 0.0331  |
| 1634: | 37 | 2 | 37 | 37 | - | 36 | 1 | 36 | 36 | 759.49823 | -0.50 | -0.2140 |
| 1635: | 38 | 2 | 38 | 38 | - | 37 | 1 | 37 | 37 | 759.98566 | -0.50 | -0.0342 |
| 1636: | 39 | 2 | 39 | 39 | - | 38 | 1 | 38 | 38 | 760.46978 | -0.50 | -0.0322 |
| 1637: | 40 | 2 | 40 | 40 | - | 39 | 1 | 39 | 39 | 760.95089 | -0.50 | 0.0968  |
| 1638: | 41 | 2 | 41 | 41 | - | 40 | 1 | 40 | 40 | 761.42862 | -0.50 | -0.0119 |
| 1639: | 42 | 2 | 42 | 42 | - | 41 | 1 | 41 | 41 | 761.90325 | -0.50 | -0.0736 |
| 1640: | 43 | 2 | 43 | 43 | - | 42 | 1 | 42 | 42 | 762.37491 | -0.50 | 0.0468  |
| 1641: | 44 | 2 | 44 | 44 | - | 43 | 1 | 43 | 43 | 762.84324 | -0.50 | -0.0056 |
| 1642: | 46 | 2 | 46 | 46 | - | 45 | 1 | 45 | 45 | 763.77085 | -0.50 | 0.3307  |
| 1643: | 47 | 2 | 47 | 47 | - | 46 | 1 | 46 | 46 | 764.22933 | -0.50 | -0.0704 |
| 1644: | 48 | 2 | 48 | 48 | - | 47 | 1 | 47 | 47 | 764.68489 | -0.50 | -0.2144 |
| 1645: | 49 | 2 | 49 | 49 | - | 48 | 1 | 48 | 48 | 765.13764 | -0.50 | 0.0138  |
| 1646: | 50 | 2 | 50 | 50 | - | 49 | 1 | 49 | 49 | 765.58690 | -0.50 | -0.0608 |
| 1647: | 51 | 2 | 51 | 51 | - | 50 | 1 | 50 | 50 | 766.03297 | -0.50 | -0.1332 |
| 1648: | 52 | 2 | 52 | 52 | - | 51 | 1 | 51 | 51 | 766.47608 | -0.50 | 0.0316  |
| 1649: | 53 | 2 | 53 | 53 | - | 52 | 1 | 52 | 52 | 766.91574 | -0.50 | -0.0512 |
| 1650: | 54 | 2 | 54 | 54 | - | 53 | 1 | 53 | 53 | 767.35218 | -0.50 | -0.1467 |
| 1651: | 55 | 2 | 55 | 55 | - | 54 | 1 | 54 | 54 | 767.78573 | -0.50 | 0.0803  |
| 1652: | 56 | 2 | 56 | 56 | - | 55 | 1 | 55 | 55 | 768.21568 | -0.50 | -0.0753 |
| 1653: | 57 | 2 | 57 | 57 | - | 56 | 1 | 56 | 56 | 768.64264 | -0.50 | 0.0017  |
| 1654: | 58 | 2 | 58 | 58 | - | 57 | 1 | 57 | 57 | 769.06630 | -0.50 | 0.0063  |
| 1655: | 59 | 2 | 59 | 59 | - | 58 | 1 | 58 | 58 | 769.48677 | -0.50 | 0.0536  |
| 1656: | 60 | 2 | 60 | 60 | - | 59 | 1 | 59 | 59 | 769.90390 | -0.50 | -0.0014 |
| 1657: | 61 | 2 | 61 | 61 | - | 60 | 1 | 60 | 60 | 770.31780 | -0.50 | -0.0434 |
| 1658: | 62 | 2 | 62 | 62 | - | 61 | 1 | 61 | 61 | 770.72846 | -0.50 | -0.0775 |
| 1659: | 63 | 2 | 63 | 63 | - | 62 | 1 | 62 | 62 | 771.13613 | -0.50 | 0.1515  |
| 1660: | 64 | 2 | 64 | 64 | - | 63 | 1 | 63 | 63 | 771.54016 | -0.50 | -0.0014 |
| 1661: | 65 | 2 | 65 | 65 | - | 64 | 1 | 64 | 64 | 771.94104 | -0.50 | -0.0410 |
| 1662: | 66 | 2 | 66 | 66 | - | 65 | 1 | 65 | 65 | 772.33870 | -0.50 | -0.0321 |
| 1663: | 67 | 2 | 67 | 67 | - | 66 | 1 | 66 | 66 | 772.73313 | -0.50 | 0.0202  |
| 1664: | 68 | 2 | 68 | 68 | - | 67 | 1 | 67 | 67 | 773.12414 | -0.50 | -0.0687 |
| 1665: | 69 | 2 | 69 | 69 | - | 68 | 1 | 68 | 68 | 773.51195 | -0.50 | -0.0739 |
| 1666: | 70 | 2 | 70 | 70 | - | 69 | 1 | 69 | 69 | 773.89655 | -0.50 | -0.0002 |
| 1667: | 71 | 2 | 71 | 71 | - | 70 | 1 | 70 | 70 | 774.27777 | -0.50 | -0.0123 |
| 1668: | 72 | 2 | 72 | 72 | - | 71 | 1 | 71 | 71 | 774.65570 | -0.50 | -0.0152 |
| 1669: | 73 | 2 | 73 | 73 | - | 72 | 1 | 72 | 72 | 775.03041 | -0.50 | 0.0662  |
| 1670: | 74 | 2 | 74 | 74 | - | 73 | 1 | 73 | 73 | 775.40164 | -0.50 | -0.0227 |
| 1671: | 76 | 2 | 76 | 76 | - | 75 | 1 | 75 | 75 | 776.13441 | -0.50 | 0.0587  |
| 1672: | 77 | 2 | 77 | 77 | - | 76 | 1 | 76 | 76 | 776.49576 | -0.50 | 0.0495  |
| 1673: | 78 | 2 | 78 | 78 | - | 77 | 1 | 77 | 77 | 776.85373 | -0.50 | -0.0094 |
| 1674: | 79 | 2 | 79 | 79 | - | 78 | 1 | 78 | 78 | 777.20849 | -0.50 | 0.0572  |
| 1675: | 80 | 2 | 80 | 80 | - | 79 | 1 | 79 | 79 | 777.55992 | -0.50 | 0.1345  |
| 1676: | 81 | 2 | 81 | 81 | - | 80 | 1 | 80 | 80 | 777.90788 | -0.50 | 0.0877  |
| 1677: | 82 | 2 | 82 | 82 | - | 81 | 1 | 81 | 81 | 778.25244 | -0.50 | -0.0080 |
| 1678: | 83 | 2 | 83 | 83 | - | 82 | 1 | 82 | 82 | 778.59375 | -0.50 | 0.0026  |
| 1679: | 84 | 2 | 84 | 84 | - | 83 | 1 | 83 | 83 | 778.93170 | -0.50 | 0.0148  |
| 1680: | 86 | 2 | 86 | 86 | - | 85 | 1 | 85 | 85 | 779.59753 | -0.50 | 0.0749  |
| 1681: | 87 | 2 | 87 | 87 | - | 86 | 1 | 86 | 86 | 779.92533 | -0.50 | 0.0532  |
| 1682: | 88 | 2 | 88 | 88 | - | 87 | 1 | 87 | 87 | 780.24978 | -0.50 | 0.0641  |
| 1683: | 89 | 2 | 89 | 89 | - | 88 | 1 | 88 | 88 | 780.57094 | -0.50 | 0.1728  |
| 1684: | 90 | 2 | 90 | 90 | - | 89 | 1 | 89 | 89 | 780.88847 | -0.50 | 0.0446  |
| 1685: | 91 | 2 | 91 | 91 | - | 90 | 1 | 90 | 90 | 781.20273 | -0.50 | 0.0448  |
| 1686: | 92 | 2 | 92 | 92 | - | 91 | 1 | 91 | 91 | 781.51346 | -0.50 | -0.0814 |

|       |     |   |     |     |   |     |   |     |     |           |       |         |
|-------|-----|---|-----|-----|---|-----|---|-----|-----|-----------|-------|---------|
| 1687: | 93  | 2 | 93  | 93  | - | 92  | 1 | 92  | 92  | 781.82103 | -0.50 | 0.0414  |
| 1688: | 94  | 2 | 94  | 94  | - | 93  | 1 | 93  | 93  | 782.12504 | -0.50 | 0.0183  |
| 1689: | 95  | 2 | 95  | 95  | - | 94  | 1 | 94  | 94  | 782.42592 | -0.50 | 0.2848  |
| 1690: | 96  | 2 | 96  | 96  | - | 95  | 1 | 95  | 95  | 782.72292 | -0.50 | 0.0961  |
| 1691: | 97  | 2 | 97  | 97  | - | 96  | 1 | 96  | 96  | 783.01672 | -0.50 | 0.1376  |
| 1692: | 99  | 2 | 99  | 99  | - | 98  | 1 | 98  | 98  | 783.59398 | -0.50 | 0.1924  |
| 1693: | 100 | 2 | 100 | 100 | - | 99  | 1 | 99  | 99  | 783.87742 | -0.50 | 0.1963  |
| 1694: | 101 | 2 | 101 | 101 | - | 100 | 1 | 100 | 100 | 784.15733 | -0.50 | 0.1217  |
| 1695: | 102 | 2 | 102 | 102 | - | 101 | 1 | 101 | 101 | 784.43390 | -0.50 | 0.1640  |
| 1696: | 103 | 2 | 103 | 103 | - | 102 | 1 | 102 | 102 | 784.70700 | -0.50 | 0.1985  |
| 1697: | 104 | 2 | 104 | 104 | - | 103 | 1 | 103 | 103 | 784.97666 | -0.50 | 0.2605  |
| 1698: | 105 | 2 | 105 | 105 | - | 104 | 1 | 104 | 104 | 785.24233 | -0.50 | -0.1945 |
| 1699: | 106 | 2 | 106 | 106 | - | 105 | 1 | 105 | 105 | 785.50528 | -0.50 | 0.1089  |
| 1700: | 107 | 2 | 107 | 107 | - | 106 | 1 | 106 | 106 | 785.76448 | -0.50 | 0.1459  |
| 1701: | 108 | 2 | 108 | 108 | - | 107 | 1 | 107 | 107 | 786.02019 | -0.50 | 0.1821  |
| 1702: | 120 | 3 | 120 | 120 | - | 121 | 2 | 121 | 121 | 641.56664 | -0.50 | 0.6758  |
| 1703: | 119 | 3 | 119 | 119 | - | 120 | 2 | 120 | 120 | 642.48754 | -0.50 | 1.4894  |
| 1704: | 118 | 3 | 118 | 118 | - | 119 | 2 | 119 | 119 | 643.40391 | -0.50 | 0.1842  |
| 1705: | 116 | 3 | 116 | 116 | - | 117 | 2 | 117 | 117 | 645.23207 | -0.50 | 0.2438  |
| 1706: | 115 | 3 | 115 | 115 | - | 116 | 2 | 116 | 116 | 646.14264 | -0.50 | 0.3968  |
| 1707: | 114 | 3 | 114 | 114 | - | 115 | 2 | 115 | 115 | 647.05089 | -0.50 | 0.6575  |
| 1708: | 113 | 3 | 113 | 113 | - | 114 | 2 | 114 | 114 | 647.95608 | -0.50 | 0.2899  |
| 1709: | 112 | 3 | 112 | 112 | - | 113 | 2 | 113 | 113 | 648.85933 | -0.50 | 0.4182  |
| 1710: | 111 | 3 | 111 | 111 | - | 112 | 2 | 112 | 112 | 649.75988 | -0.50 | 0.2864  |
| 1711: | 110 | 3 | 110 | 110 | - | 111 | 2 | 111 | 111 | 650.65906 | -0.50 | 1.2288  |
| 1712: | 109 | 3 | 109 | 109 | - | 110 | 2 | 110 | 110 | 651.55373 | -0.50 | 0.1094  |
| 1713: | 106 | 3 | 106 | 106 | - | 107 | 2 | 107 | 107 | 654.22638 | -0.50 | 0.1226  |
| 1714: | 105 | 3 | 105 | 105 | - | 106 | 2 | 106 | 106 | 655.11248 | -0.50 | 0.2679  |
| 1715: | 104 | 3 | 104 | 104 | - | 105 | 2 | 105 | 105 | 655.99550 | -0.50 | -0.1976 |
| 1716: | 103 | 3 | 103 | 103 | - | 104 | 2 | 104 | 104 | 656.87679 | -0.50 | 0.0801  |
| 1717: | 102 | 3 | 102 | 102 | - | 103 | 2 | 103 | 103 | 657.75540 | -0.50 | 0.1554  |
| 1718: | 101 | 3 | 101 | 101 | - | 102 | 2 | 102 | 102 | 658.63109 | -0.50 | -0.2076 |
| 1719: | 100 | 3 | 100 | 100 | - | 101 | 2 | 101 | 101 | 659.50514 | -0.50 | 0.2753  |
| 1720: | 99  | 3 | 99  | 99  | - | 100 | 2 | 100 | 100 | 660.37599 | -0.50 | 0.0483  |
| 1721: | 98  | 3 | 98  | 98  | - | 99  | 2 | 99  | 99  | 661.24437 | -0.50 | -0.1543 |
| 1722: | 96  | 3 | 96  | 96  | - | 97  | 2 | 97  | 97  | 662.97394 | -0.50 | -0.2495 |
| 1723: | 95  | 3 | 95  | 95  | - | 96  | 2 | 96  | 96  | 663.83517 | -0.50 | -0.0935 |
| 1724: | 93  | 3 | 93  | 93  | - | 94  | 2 | 94  | 94  | 665.54967 | -0.50 | -0.2034 |
| 1725: | 92  | 3 | 92  | 92  | - | 93  | 2 | 93  | 93  | 666.40341 | -0.50 | 0.0093  |
| 1726: | 90  | 3 | 90  | 90  | - | 91  | 2 | 91  | 91  | 668.10287 | -0.50 | -0.0085 |
| 1727: | 89  | 3 | 89  | 89  | - | 90  | 2 | 90  | 90  | 668.94872 | -0.50 | -0.1004 |
| 1728: | 88  | 3 | 88  | 88  | - | 89  | 2 | 89  | 89  | 669.79218 | -0.50 | -0.0454 |
| 1729: | 85  | 3 | 85  | 85  | - | 86  | 2 | 86  | 86  | 672.30714 | -0.50 | -0.0352 |
| 1730: | 83  | 3 | 83  | 83  | - | 84  | 2 | 84  | 84  | 673.97111 | -0.50 | 0.0657  |
| 1731: | 82  | 3 | 82  | 82  | - | 83  | 2 | 83  | 83  | 674.79893 | -0.50 | -0.2067 |
| 1732: | 81  | 3 | 81  | 81  | - | 82  | 2 | 82  | 82  | 675.62466 | -0.50 | -0.0018 |
| 1733: | 80  | 3 | 80  | 80  | - | 81  | 2 | 81  | 81  | 676.44765 | -0.50 | 0.0347  |
| 1734: | 79  | 3 | 79  | 79  | - | 80  | 2 | 80  | 80  | 677.26808 | -0.50 | 0.0872  |
| 1735: | 78  | 3 | 78  | 78  | - | 79  | 2 | 79  | 79  | 678.08555 | -0.50 | -0.2400 |
| 1736: | 77  | 3 | 77  | 77  | - | 78  | 2 | 78  | 78  | 678.90104 | -0.50 | 0.0374  |
| 1737: | 76  | 3 | 76  | 76  | - | 77  | 2 | 77  | 77  | 679.71334 | -0.50 | -0.2861 |
| 1738: | 75  | 3 | 75  | 75  | - | 76  | 2 | 76  | 76  | 680.52380 | -0.50 | 0.1439  |
| 1739: | 74  | 3 | 74  | 74  | - | 75  | 2 | 75  | 75  | 681.33091 | -0.50 | -0.1784 |
| 1740: | 73  | 3 | 73  | 73  | - | 74  | 2 | 74  | 74  | 682.13594 | -0.50 | 0.0216  |
| 1741: | 72  | 3 | 72  | 72  | - | 73  | 2 | 73  | 73  | 682.93809 | -0.50 | -0.0518 |
| 1742: | 71  | 3 | 71  | 71  | - | 72  | 2 | 72  | 72  | 683.73770 | -0.50 | -0.0543 |
| 1743: | 70  | 3 | 70  | 70  | - | 71  | 2 | 71  | 71  | 684.53481 | -0.50 | 0.0587  |
| 1744: | 69  | 3 | 69  | 69  | - | 70  | 2 | 70  | 70  | 685.32907 | -0.50 | -0.0585 |
| 1745: | 68  | 3 | 68  | 68  | - | 69  | 2 | 69  | 69  | 686.12090 | -0.50 | 0.0186  |
| 1746: | 67  | 3 | 67  | 67  | - | 68  | 2 | 68  | 68  | 686.91004 | -0.50 | 0.0343  |
| 1747: | 66  | 3 | 66  | 66  | - | 67  | 2 | 67  | 67  | 687.69694 | -0.50 | 0.4432  |
| 1748: | 65  | 3 | 65  | 65  | - | 66  | 2 | 66  | 66  | 688.48053 | -0.50 | 0.1795  |
| 1749: | 64  | 3 | 64  | 64  | - | 65  | 2 | 65  | 65  | 689.26160 | -0.50 | 0.0379  |
| 1750: | 63  | 3 | 63  | 63  | - | 64  | 2 | 64  | 64  | 690.04011 | -0.50 | -0.0173 |
| 1751: | 62  | 3 | 62  | 62  | - | 63  | 2 | 63  | 63  | 690.81608 | -0.50 | 0.0384  |
| 1752: | 61  | 3 | 61  | 61  | - | 62  | 2 | 62  | 62  | 691.58935 | -0.50 | 0.0495  |
| 1753: | 60  | 3 | 60  | 60  | - | 61  | 2 | 61  | 61  | 692.35991 | -0.50 | 0.0104  |
| 1754: | 59  | 3 | 59  | 59  | - | 60  | 2 | 60  | 60  | 693.12789 | -0.50 | 0.0555  |
| 1755: | 58  | 3 | 58  | 58  | - | 59  | 2 | 59  | 59  | 693.89314 | -0.50 | 0.0395  |
| 1756: | 57  | 3 | 57  | 57  | - | 58  | 2 | 58  | 58  | 694.65591 | -0.50 | 0.2167  |
| 1757: | 56  | 3 | 56  | 56  | - | 57  | 2 | 57  | 57  | 695.41566 | -0.50 | 0.0517  |

|       |    |   |    |    |   |    |   |    |    |           |       |         |
|-------|----|---|----|----|---|----|---|----|----|-----------|-------|---------|
| 1758: | 55 | 3 | 55 | 55 | - | 56 | 2 | 56 | 56 | 696.17281 | -0.50 | -0.0311 |
| 1759: | 54 | 3 | 54 | 54 | - | 55 | 2 | 55 | 55 | 696.92730 | -0.50 | -0.0872 |
| 1760: | 53 | 3 | 53 | 53 | - | 54 | 2 | 54 | 54 | 697.67929 | -0.50 | 0.0480  |
| 1761: | 52 | 3 | 52 | 52 | - | 53 | 2 | 53 | 53 | 698.42827 | -0.50 | -0.1310 |
| 1762: | 51 | 3 | 51 | 51 | - | 52 | 2 | 52 | 52 | 699.17483 | -0.50 | -0.0298 |
| 1763: | 50 | 3 | 50 | 50 | - | 51 | 2 | 51 | 51 | 699.91867 | -0.50 | 0.0562  |
| 1764: | 49 | 3 | 49 | 49 | - | 50 | 2 | 50 | 50 | 700.65999 | -0.50 | 0.3316  |
| 1765: | 48 | 3 | 48 | 48 | - | 49 | 2 | 49 | 49 | 701.39788 | -0.50 | -0.1092 |
| 1766: | 47 | 3 | 47 | 47 | - | 48 | 2 | 48 | 48 | 702.13353 | -0.50 | -0.0715 |
| 1767: | 46 | 3 | 46 | 46 | - | 47 | 2 | 47 | 47 | 702.86661 | -0.50 | 0.1191  |
| 1768: | 44 | 3 | 44 | 44 | - | 45 | 2 | 45 | 45 | 704.32388 | -0.50 | -0.2027 |
| 1769: | 43 | 3 | 43 | 43 | - | 44 | 2 | 44 | 44 | 705.04853 | -0.50 | -0.2460 |
| 1770: | 42 | 3 | 42 | 42 | - | 43 | 2 | 43 | 43 | 705.77073 | -0.50 | 0.0020  |
| 1771: | 41 | 3 | 41 | 41 | - | 42 | 2 | 42 | 42 | 706.48991 | -0.50 | -0.0243 |
| 1772: | 40 | 3 | 40 | 40 | - | 41 | 2 | 41 | 41 | 707.20641 | -0.50 | 0.0197  |
| 1773: | 39 | 3 | 39 | 39 | - | 40 | 2 | 40 | 40 | 707.92012 | -0.50 | 0.0286  |
| 1774: | 38 | 3 | 38 | 38 | - | 39 | 2 | 39 | 39 | 708.63084 | -0.50 | -0.1929 |
| 1775: | 37 | 3 | 37 | 37 | - | 38 | 2 | 38 | 38 | 709.33927 | -0.50 | 0.0596  |
| 1776: | 36 | 3 | 36 | 36 | - | 37 | 2 | 37 | 37 | 710.04464 | -0.50 | 0.0208  |
| 1777: | 35 | 3 | 35 | 35 | - | 36 | 2 | 36 | 36 | 710.74752 | -0.50 | 0.2653  |
| 1778: | 34 | 3 | 34 | 34 | - | 35 | 2 | 35 | 35 | 711.44717 | -0.50 | 0.0577  |
| 1779: | 33 | 3 | 33 | 33 | - | 34 | 2 | 34 | 34 | 712.14414 | -0.50 | -0.0474 |
| 1780: | 32 | 3 | 32 | 32 | - | 33 | 2 | 33 | 33 | 712.83864 | -0.50 | 0.1647  |
| 1781: | 31 | 3 | 31 | 31 | - | 32 | 2 | 32 | 32 | 713.53018 | -0.50 | 0.2085  |
| 1782: | 30 | 3 | 30 | 30 | - | 31 | 2 | 31 | 31 | 714.21925 | -0.50 | 0.5787  |
| 1783: | 29 | 3 | 29 | 29 | - | 30 | 2 | 30 | 30 | 714.90483 | -0.50 | 0.2599  |
| 1784: | 28 | 3 | 28 | 28 | - | 29 | 2 | 29 | 29 | 715.58776 | -0.50 | 0.0968  |
| 1785: | 26 | 3 | 26 | 26 | - | 27 | 2 | 27 | 27 | 716.94531 | -0.50 | -0.1039 |
| 1786: | 25 | 3 | 25 | 25 | - | 26 | 2 | 26 | 26 | 717.61970 | -0.50 | -0.3622 |
| 1787: | 24 | 3 | 24 | 24 | - | 25 | 2 | 25 | 25 | 718.29143 | -0.50 | -0.4562 |
| 1788: | 23 | 3 | 23 | 23 | - | 24 | 2 | 24 | 24 | 718.96089 | -0.50 | 0.0087  |
| 1789: | 22 | 3 | 22 | 22 | - | 23 | 2 | 23 | 23 | 719.62703 | -0.50 | -0.0128 |
| 1790: | 21 | 3 | 21 | 21 | - | 22 | 2 | 22 | 22 | 720.29015 | -0.50 | -0.2160 |
| 1791: | 20 | 3 | 20 | 20 | - | 21 | 2 | 21 | 21 | 720.95096 | -0.50 | 0.1137  |
| 1792: | 19 | 3 | 19 | 19 | - | 20 | 2 | 20 | 20 | 721.60849 | -0.50 | 0.0111  |
| 1793: | 17 | 3 | 17 | 17 | - | 18 | 2 | 18 | 18 | 722.91498 | -0.50 | -0.2025 |
| 1794: | 16 | 3 | 16 | 16 | - | 17 | 2 | 17 | 17 | 723.56424 | -0.50 | -0.0041 |
| 1795: | 15 | 3 | 15 | 15 | - | 16 | 2 | 16 | 16 | 724.21043 | -0.50 | -0.0092 |
| 1796: | 14 | 3 | 14 | 14 | - | 15 | 2 | 15 | 15 | 724.85381 | -0.50 | 0.0468  |
| 1797: | 13 | 3 | 13 | 13 | - | 14 | 2 | 14 | 14 | 725.49423 | -0.50 | 0.0186  |
| 1798: | 12 | 3 | 12 | 12 | - | 13 | 2 | 13 | 13 | 726.13142 | -0.50 | -0.3590 |
| 1799: | 11 | 3 | 11 | 11 | - | 12 | 2 | 12 | 12 | 726.76653 | -0.50 | 0.0687  |
| 1800: | 10 | 3 | 10 | 10 | - | 11 | 2 | 11 | 11 | 727.39829 | -0.50 | 0.0364  |
| 1801: | 9  | 3 | 9  | 9  | - | 10 | 2 | 10 | 10 | 728.02667 | -0.50 | -0.4811 |
| 1802: | 8  | 3 | 8  | 8  | - | 9  | 2 | 9  | 9  | 728.65317 | -0.50 | 0.0209  |
| 1803: | 7  | 3 | 7  | 7  | - | 8  | 2 | 8  | 8  | 729.27624 | -0.50 | -0.0029 |
| 1804: | 6  | 3 | 6  | 6  | - | 7  | 2 | 7  | 7  | 729.89618 | -0.50 | -0.2477 |
| 1805: | 5  | 3 | 5  | 5  | - | 6  | 2 | 6  | 6  | 730.51365 | -0.50 | -0.0488 |
| 1806: | 4  | 3 | 4  | 4  | - | 5  | 2 | 5  | 5  | 731.12816 | -0.50 | 0.1086  |
| 1807: | 3  | 3 | 3  | 3  | - | 4  | 2 | 4  | 4  | 731.73949 | -0.50 | 0.0093  |
| 1808: | 2  | 3 | 2  | 2  | - | 3  | 2 | 3  | 3  | 732.34793 | -0.50 | -0.0520 |
| 1809: | 2  | 3 | 2  | 2  | - | 1  | 2 | 1  | 1  | 735.34651 | -0.50 | 0.1094  |
| 1810: | 5  | 3 | 5  | 5  | - | 4  | 2 | 4  | 4  | 737.10993 | -0.50 | -0.0790 |
| 1811: | 6  | 3 | 6  | 6  | - | 5  | 2 | 5  | 5  | 737.69235 | -0.50 | 0.4074  |
| 1812: | 7  | 3 | 7  | 7  | - | 6  | 2 | 6  | 6  | 738.27110 | -0.50 | 0.1998  |
| 1813: | 8  | 3 | 8  | 8  | - | 7  | 2 | 7  | 7  | 738.84690 | -0.50 | 0.0231  |
| 1814: | 9  | 3 | 9  | 9  | - | 8  | 2 | 8  | 8  | 739.41941 | -0.50 | -0.4580 |
| 1815: | 10 | 3 | 10 | 10 | - | 9  | 2 | 9  | 9  | 739.98991 | -0.50 | 0.0414  |
| 1816: | 11 | 3 | 11 | 11 | - | 10 | 2 | 10 | 10 | 740.55699 | -0.50 | 0.1161  |
| 1817: | 12 | 3 | 12 | 12 | - | 11 | 2 | 11 | 11 | 741.12056 | -0.50 | -0.3191 |
| 1818: | 13 | 3 | 13 | 13 | - | 12 | 2 | 12 | 12 | 741.68171 | -0.50 | -0.1692 |
| 1819: | 14 | 3 | 14 | 14 | - | 13 | 2 | 13 | 13 | 742.23994 | -0.50 | 0.0705  |
| 1820: | 15 | 3 | 15 | 15 | - | 14 | 2 | 14 | 14 | 742.79486 | -0.50 | 0.0150  |
| 1821: | 16 | 3 | 16 | 16 | - | 15 | 2 | 15 | 15 | 743.34671 | -0.50 | -0.0910 |
| 1822: | 17 | 3 | 17 | 17 | - | 16 | 2 | 16 | 16 | 743.89566 | -0.50 | -0.0725 |
| 1823: | 18 | 3 | 18 | 18 | - | 17 | 2 | 17 | 17 | 744.44169 | -0.50 | 0.0554  |
| 1824: | 19 | 3 | 19 | 19 | - | 18 | 2 | 18 | 18 | 744.98439 | -0.50 | -0.1126 |
| 1825: | 20 | 3 | 20 | 20 | - | 19 | 2 | 19 | 19 | 745.52417 | -0.50 | -0.1615 |
| 1826: | 21 | 3 | 21 | 21 | - | 20 | 2 | 20 | 20 | 746.06104 | -0.50 | -0.0764 |
| 1827: | 22 | 3 | 22 | 22 | - | 21 | 2 | 21 | 21 | 746.59487 | -0.50 | 0.0176  |
| 1828: | 23 | 3 | 23 | 23 | - | 22 | 2 | 22 | 22 | 747.12542 | -0.50 | -0.1147 |

|       |    |   |    |    |   |    |   |    |    |           |       |         |
|-------|----|---|----|----|---|----|---|----|----|-----------|-------|---------|
| 1829: | 24 | 3 | 24 | 24 | - | 23 | 2 | 23 | 23 | 747.65312 | -0.50 | -0.0383 |
| 1830: | 25 | 3 | 25 | 25 | - | 24 | 2 | 24 | 24 | 748.17770 | -0.50 | -0.0183 |
| 1831: | 26 | 3 | 26 | 26 | - | 25 | 2 | 25 | 25 | 748.69918 | -0.50 | -0.0298 |
| 1832: | 28 | 3 | 28 | 28 | - | 27 | 2 | 27 | 27 | 749.73297 | -0.50 | 0.0024  |
| 1833: | 29 | 3 | 29 | 29 | - | 28 | 2 | 28 | 28 | 750.24522 | -0.50 | -0.0040 |
| 1834: | 30 | 3 | 30 | 30 | - | 29 | 2 | 29 | 29 | 750.75435 | -0.50 | -0.0423 |
| 1835: | 31 | 3 | 31 | 31 | - | 30 | 2 | 30 | 30 | 751.26036 | -0.50 | -0.1074 |
| 1836: | 32 | 3 | 32 | 32 | - | 31 | 2 | 31 | 31 | 751.76344 | -0.50 | -0.0044 |
| 1837: | 33 | 3 | 33 | 33 | - | 32 | 2 | 32 | 32 | 752.26322 | -0.50 | -0.0984 |
| 1838: | 34 | 3 | 34 | 34 | - | 33 | 2 | 33 | 33 | 752.75999 | -0.50 | -0.0943 |
| 1839: | 35 | 3 | 35 | 35 | - | 34 | 2 | 34 | 34 | 753.25375 | -0.50 | 0.0127  |
| 1840: | 36 | 3 | 36 | 36 | - | 35 | 2 | 35 | 35 | 753.74416 | -0.50 | -0.1124 |
| 1841: | 37 | 3 | 37 | 37 | - | 36 | 2 | 36 | 36 | 754.23163 | -0.50 | -0.0546 |
| 1842: | 38 | 3 | 38 | 38 | - | 37 | 2 | 37 | 37 | 754.71664 | -0.50 | 0.6711  |
| 1843: | 39 | 3 | 39 | 39 | - | 38 | 2 | 38 | 38 | 755.19712 | -0.50 | -0.0003 |
| 1844: | 40 | 3 | 40 | 40 | - | 39 | 2 | 39 | 39 | 755.67501 | -0.50 | -0.1239 |
| 1845: | 41 | 3 | 41 | 41 | - | 40 | 2 | 40 | 40 | 756.15044 | -0.50 | 0.4353  |
| 1846: | 42 | 3 | 42 | 42 | - | 41 | 2 | 41 | 41 | 756.62162 | -0.50 | -0.1076 |
| 1847: | 43 | 3 | 43 | 43 | - | 42 | 2 | 42 | 42 | 757.09036 | -0.50 | 0.0624  |
| 1848: | 44 | 3 | 44 | 44 | - | 43 | 2 | 43 | 43 | 757.55572 | -0.50 | 0.0102  |
| 1849: | 45 | 3 | 45 | 45 | - | 44 | 2 | 44 | 44 | 758.01805 | -0.50 | 0.0908  |
| 1850: | 46 | 3 | 46 | 46 | - | 45 | 2 | 45 | 45 | 758.47702 | -0.50 | -0.0206 |
| 1851: | 47 | 3 | 47 | 47 | - | 46 | 2 | 46 | 46 | 758.93256 | -0.50 | -0.3892 |
| 1852: | 48 | 3 | 48 | 48 | - | 47 | 2 | 47 | 47 | 759.38565 | -0.50 | -0.0298 |
| 1853: | 49 | 3 | 49 | 49 | - | 48 | 2 | 48 | 48 | 759.83520 | -0.50 | -0.0274 |
| 1854: | 50 | 3 | 50 | 50 | - | 49 | 2 | 49 | 49 | 760.28183 | -0.50 | 0.2431  |
| 1855: | 51 | 3 | 51 | 51 | - | 50 | 2 | 50 | 50 | 760.72461 | -0.50 | -0.1434 |
| 1856: | 52 | 3 | 52 | 52 | - | 51 | 2 | 51 | 51 | 761.16478 | -0.50 | 0.0582  |
| 1857: | 53 | 3 | 53 | 53 | - | 52 | 2 | 52 | 52 | 761.60149 | -0.50 | 0.0030  |
| 1858: | 54 | 3 | 54 | 54 | - | 53 | 2 | 53 | 53 | 762.03508 | -0.50 | 0.0361  |
| 1859: | 55 | 3 | 55 | 55 | - | 54 | 2 | 54 | 54 | 762.46536 | -0.50 | -0.0275 |
| 1860: | 56 | 3 | 56 | 56 | - | 55 | 2 | 55 | 55 | 762.89252 | -0.50 | 0.0073  |
| 1861: | 58 | 3 | 58 | 58 | - | 57 | 2 | 57 | 57 | 763.73715 | -0.50 | 0.0624  |
| 1862: | 59 | 3 | 59 | 59 | - | 58 | 2 | 58 | 58 | 764.15465 | -0.50 | 0.1229  |
| 1863: | 60 | 3 | 60 | 60 | - | 59 | 2 | 59 | 59 | 764.56873 | -0.50 | 0.0022  |
| 1864: | 61 | 3 | 61 | 61 | - | 60 | 2 | 60 | 60 | 764.97978 | -0.50 | 0.0954  |
| 1865: | 62 | 3 | 62 | 62 | - | 61 | 2 | 61 | 61 | 765.38751 | -0.50 | 0.1176  |
| 1866: | 63 | 3 | 63 | 63 | - | 62 | 2 | 62 | 62 | 765.79237 | -0.50 | 0.5238  |
| 1867: | 64 | 3 | 64 | 64 | - | 63 | 2 | 63 | 63 | 766.19298 | -0.50 | -0.0607 |
| 1868: | 65 | 3 | 65 | 65 | - | 64 | 2 | 64 | 64 | 766.59129 | -0.50 | 0.3191  |
| 1869: | 66 | 3 | 66 | 66 | - | 65 | 2 | 65 | 65 | 766.98566 | -0.50 | 0.0285  |
| 1870: | 67 | 3 | 67 | 67 | - | 66 | 2 | 66 | 66 | 767.37699 | -0.50 | -0.0275 |
| 1871: | 68 | 3 | 68 | 68 | - | 67 | 2 | 67 | 67 | 767.76518 | -0.50 | 0.0562  |
| 1872: | 69 | 3 | 69 | 69 | - | 68 | 2 | 68 | 68 | 768.14968 | -0.50 | -0.2651 |
| 1873: | 70 | 3 | 70 | 70 | - | 69 | 2 | 69 | 69 | 768.53153 | -0.50 | 0.0537  |
| 1874: | 71 | 3 | 71 | 71 | - | 70 | 2 | 70 | 70 | 768.90979 | -0.50 | 0.0777  |
| 1875: | 72 | 3 | 72 | 72 | - | 71 | 2 | 71 | 71 | 769.28467 | -0.50 | 0.0222  |
| 1876: | 73 | 3 | 73 | 73 | - | 72 | 2 | 72 | 72 | 769.65627 | -0.50 | -0.0077 |
| 1877: | 74 | 3 | 74 | 74 | - | 73 | 2 | 73 | 73 | 770.02457 | -0.50 | -0.0268 |
| 1878: | 75 | 3 | 75 | 75 | - | 74 | 2 | 74 | 74 | 770.38960 | -0.50 | 0.0001  |
| 1879: | 76 | 3 | 76 | 76 | - | 75 | 2 | 75 | 75 | 770.75124 | -0.50 | -0.0418 |
| 1880: | 77 | 3 | 77 | 77 | - | 76 | 2 | 76 | 76 | 771.10964 | -0.50 | 0.0027  |
| 1881: | 78 | 3 | 78 | 78 | - | 77 | 2 | 77 | 77 | 771.46476 | -0.50 | 0.0988  |
| 1882: | 79 | 3 | 79 | 79 | - | 78 | 2 | 78 | 78 | 771.81625 | -0.50 | -0.0983 |
| 1883: | 80 | 3 | 80 | 80 | - | 79 | 2 | 79 | 79 | 772.16480 | -0.50 | 0.1067  |
| 1884: | 81 | 3 | 81 | 81 | - | 80 | 2 | 80 | 80 | 772.50976 | -0.50 | 0.0689  |
| 1885: | 82 | 3 | 82 | 82 | - | 81 | 2 | 81 | 81 | 772.85135 | -0.50 | 0.0137  |
| 1886: | 83 | 3 | 83 | 83 | - | 82 | 2 | 82 | 82 | 773.18981 | -0.50 | 0.1862  |
| 1887: | 84 | 3 | 84 | 84 | - | 83 | 2 | 83 | 83 | 773.52465 | -0.50 | 0.1017  |
| 1888: | 85 | 3 | 85 | 85 | - | 84 | 2 | 84 | 84 | 773.85647 | -0.50 | 0.3655  |
| 1889: | 86 | 3 | 86 | 86 | - | 85 | 2 | 85 | 85 | 774.18450 | -0.50 | 0.2129  |
| 1890: | 87 | 3 | 87 | 87 | - | 86 | 2 | 86 | 86 | 774.50920 | -0.50 | 0.1090  |
| 1891: | 89 | 3 | 89 | 89 | - | 88 | 2 | 88 | 88 | 775.14839 | -0.50 | -0.1512 |
| 1892: | 90 | 3 | 90 | 90 | - | 89 | 2 | 89 | 89 | 775.46310 | -0.50 | -0.0770 |
| 1893: | 93 | 3 | 93 | 93 | - | 92 | 2 | 92 | 92 | 776.38645 | -0.50 | -0.2134 |
| 1894: | 94 | 3 | 94 | 94 | - | 93 | 2 | 93 | 93 | 776.68790 | -0.50 | 0.2325  |
| 1895: | 95 | 3 | 95 | 95 | - | 94 | 2 | 94 | 94 | 776.98527 | -0.50 | 0.0196  |
| 1896: | 96 | 3 | 96 | 96 | - | 95 | 2 | 95 | 95 | 777.27982 | -0.50 | 0.4133  |
| 1897: | 97 | 3 | 97 | 97 | - | 96 | 2 | 96 | 96 | 777.57081 | -0.50 | 0.6788  |
| 1898: | 98 | 3 | 98 | 98 | - | 97 | 2 | 97 | 97 | 777.85751 | -0.50 | 0.0916  |
| 1899: | 99 | 3 | 99 | 99 | - | 98 | 2 | 98 | 98 | 778.14134 | -0.50 | 0.0770  |

|       |     |   |     |     |   |     |   |     |     |           |       |         |
|-------|-----|---|-----|-----|---|-----|---|-----|-----|-----------|-------|---------|
| 1900: | 100 | 3 | 100 | 100 | - | 99  | 2 | 99  | 99  | 778.42164 | -0.50 | -0.0196 |
| 1901: | 101 | 3 | 101 | 101 | - | 100 | 2 | 100 | 100 | 778.69869 | -0.50 | 0.0871  |
| 1902: | 102 | 3 | 102 | 102 | - | 101 | 2 | 101 | 101 | 778.97227 | -0.50 | 0.1825  |
| 1903: | 103 | 3 | 103 | 103 | - | 102 | 2 | 102 | 102 | 779.24163 | -0.50 | -0.4780 |
| 1904: | 104 | 3 | 104 | 104 | - | 103 | 2 | 103 | 103 | 779.50856 | -0.50 | -0.0991 |
| 1905: | 105 | 3 | 105 | 105 | - | 104 | 2 | 104 | 104 | 779.77151 | -0.50 | -0.2252 |
| 1906: | 106 | 3 | 106 | 106 | - | 105 | 2 | 105 | 105 | 780.03231 | -0.50 | 0.9790  |
| 1907: | 107 | 3 | 107 | 107 | - | 106 | 2 | 106 | 106 | 780.28738 | -0.50 | -0.0612 |
| 1908: | 108 | 3 | 108 | 108 | - | 107 | 2 | 107 | 107 | 780.54021 | -0.50 | 0.1498  |
| 1909: | 112 | 4 | 112 | 112 | - | 113 | 3 | 113 | 113 | 644.03646 | -0.50 | -0.8331 |
| 1910: | 111 | 4 | 111 | 111 | - | 112 | 3 | 112 | 112 | 644.93464 | -0.50 | -0.4484 |
| 1911: | 110 | 4 | 110 | 110 | - | 111 | 3 | 111 | 111 | 645.82979 | -0.50 | -0.6487 |
| 1912: | 107 | 4 | 107 | 107 | - | 108 | 3 | 108 | 108 | 648.50171 | -0.50 | -0.0677 |
| 1913: | 106 | 4 | 106 | 106 | - | 107 | 3 | 107 | 107 | 649.38721 | -0.50 | -0.0963 |
| 1914: | 105 | 4 | 105 | 105 | - | 106 | 3 | 106 | 106 | 650.27104 | -0.50 | 0.6708  |
| 1915: | 104 | 4 | 104 | 104 | - | 105 | 3 | 105 | 105 | 651.15131 | -0.50 | 0.3480  |
| 1916: | 103 | 4 | 103 | 103 | - | 104 | 3 | 104 | 104 | 652.02909 | -0.50 | 0.0093  |
| 1917: | 102 | 4 | 102 | 102 | - | 103 | 3 | 103 | 103 | 652.90498 | -0.50 | 0.2590  |
| 1918: | 101 | 4 | 101 | 101 | - | 102 | 3 | 102 | 102 | 653.77807 | -0.50 | 0.1912  |
| 1919: | 100 | 4 | 100 | 100 | - | 101 | 3 | 101 | 101 | 654.64852 | -0.50 | -0.0299 |
| 1920: | 99  | 4 | 99  | 99  | - | 100 | 3 | 100 | 100 | 655.51670 | -0.50 | -0.0300 |
| 1921: | 98  | 4 | 98  | 98  | - | 99  | 3 | 99  | 99  | 656.38324 | -0.50 | 0.8250  |
| 1922: | 97  | 4 | 97  | 97  | - | 98  | 3 | 98  | 98  | 657.24524 | -0.50 | -0.3606 |
| 1923: | 96  | 4 | 96  | 96  | - | 97  | 3 | 97  | 97  | 658.10625 | -0.50 | -0.0326 |
| 1924: | 95  | 4 | 95  | 95  | - | 96  | 3 | 96  | 96  | 658.96465 | -0.50 | 0.1933  |
| 1925: | 94  | 4 | 94  | 94  | - | 95  | 3 | 95  | 95  | 659.82022 | -0.50 | 0.1012  |
| 1926: | 93  | 4 | 93  | 93  | - | 94  | 3 | 94  | 94  | 660.67383 | -0.50 | 0.5655  |
| 1927: | 92  | 4 | 92  | 92  | - | 93  | 3 | 93  | 93  | 661.52379 | -0.50 | -0.0996 |
| 1928: | 91  | 4 | 91  | 91  | - | 92  | 3 | 92  | 92  | 662.37179 | -0.50 | -0.1998 |
| 1929: | 90  | 4 | 90  | 90  | - | 91  | 3 | 91  | 91  | 663.21800 | -0.50 | 0.4391  |
| 1930: | 89  | 4 | 89  | 89  | - | 90  | 3 | 90  | 90  | 664.06083 | -0.50 | 0.2314  |
| 1931: | 88  | 4 | 88  | 88  | - | 89  | 3 | 89  | 89  | 664.90107 | -0.50 | -0.0286 |
| 1932: | 87  | 4 | 87  | 87  | - | 88  | 3 | 88  | 88  | 665.73914 | -0.50 | 0.0834  |
| 1933: | 86  | 4 | 86  | 86  | - | 87  | 3 | 87  | 87  | 666.57447 | -0.50 | 0.0017  |
| 1934: | 85  | 4 | 85  | 85  | - | 86  | 3 | 86  | 86  | 667.40741 | -0.50 | 0.0806  |
| 1935: | 84  | 4 | 84  | 84  | - | 85  | 3 | 85  | 85  | 668.23774 | -0.50 | 0.1045  |
| 1936: | 82  | 4 | 82  | 82  | - | 83  | 3 | 83  | 83  | 669.89078 | -0.50 | 0.2141  |
| 1937: | 81  | 4 | 81  | 81  | - | 82  | 3 | 82  | 82  | 670.71300 | -0.50 | -0.1814 |
| 1938: | 80  | 4 | 80  | 80  | - | 81  | 3 | 81  | 81  | 671.53340 | -0.50 | 0.1753  |
| 1939: | 79  | 4 | 79  | 79  | - | 80  | 3 | 80  | 80  | 672.35087 | -0.50 | 0.1786  |
| 1940: | 78  | 4 | 78  | 78  | - | 79  | 3 | 79  | 79  | 673.16567 | -0.50 | 0.0928  |
| 1941: | 77  | 4 | 77  | 77  | - | 78  | 3 | 78  | 78  | 673.97776 | -0.50 | -0.1177 |
| 1942: | 76  | 4 | 76  | 76  | - | 77  | 3 | 77  | 77  | 674.78693 | -0.50 | -0.6586 |
| 1943: | 75  | 4 | 75  | 75  | - | 76  | 3 | 76  | 76  | 675.59468 | -0.50 | -0.0255 |
| 1944: | 74  | 4 | 74  | 74  | - | 75  | 3 | 75  | 75  | 676.39913 | -0.50 | -0.0939 |
| 1945: | 73  | 4 | 73  | 73  | - | 74  | 3 | 74  | 74  | 677.20088 | -0.50 | -0.2596 |
| 1946: | 72  | 4 | 72  | 72  | - | 73  | 3 | 73  | 73  | 678.00045 | -0.50 | 0.0018  |
| 1947: | 71  | 4 | 71  | 71  | - | 72  | 3 | 72  | 72  | 678.79733 | -0.50 | 0.1849  |
| 1948: | 70  | 4 | 70  | 70  | - | 71  | 3 | 71  | 71  | 679.59092 | -0.50 | -0.3061 |
| 1949: | 69  | 4 | 69  | 69  | - | 70  | 3 | 70  | 70  | 680.38269 | -0.50 | 0.0032  |
| 1950: | 68  | 4 | 68  | 68  | - | 69  | 3 | 69  | 69  | 681.17163 | -0.50 | 0.1074  |
| 1951: | 67  | 4 | 67  | 67  | - | 68  | 3 | 68  | 68  | 681.95790 | -0.50 | 0.1707  |
| 1952: | 66  | 4 | 66  | 66  | - | 67  | 3 | 67  | 67  | 682.74133 | -0.50 | 0.0277  |
| 1953: | 65  | 4 | 65  | 65  | - | 66  | 3 | 66  | 66  | 683.52236 | -0.50 | 0.1227  |
| 1954: | 64  | 4 | 64  | 64  | - | 65  | 3 | 65  | 65  | 684.30065 | -0.50 | 0.1202  |
| 1955: | 63  | 4 | 63  | 63  | - | 64  | 3 | 64  | 64  | 685.07625 | -0.50 | 0.0747  |
| 1956: | 62  | 4 | 62  | 62  | - | 63  | 3 | 63  | 63  | 685.84904 | -0.50 | -0.1294 |
| 1957: | 61  | 4 | 61  | 61  | - | 62  | 3 | 62  | 62  | 686.61950 | -0.50 | -0.0077 |
| 1958: | 60  | 4 | 60  | 60  | - | 61  | 3 | 61  | 61  | 687.38726 | -0.50 | 0.0743  |
| 1959: | 59  | 4 | 59  | 59  | - | 60  | 3 | 60  | 60  | 688.15233 | -0.50 | 0.1311  |
| 1960: | 58  | 4 | 58  | 58  | - | 59  | 3 | 59  | 59  | 688.91455 | -0.50 | 0.0072  |
| 1961: | 57  | 4 | 57  | 57  | - | 58  | 3 | 58  | 58  | 689.67425 | -0.50 | 0.0370  |
| 1962: | 56  | 4 | 56  | 56  | - | 57  | 3 | 57  | 57  | 690.43111 | -0.50 | -0.0950 |
| 1963: | 55  | 4 | 55  | 55  | - | 56  | 3 | 56  | 56  | 691.18542 | -0.50 | -0.0943 |
| 1964: | 54  | 4 | 54  | 54  | - | 55  | 3 | 55  | 55  | 691.93718 | -0.50 | 0.0436  |
| 1965: | 53  | 4 | 53  | 53  | - | 54  | 3 | 54  | 54  | 692.68611 | -0.50 | 0.0432  |
| 1966: | 52  | 4 | 52  | 52  | - | 53  | 3 | 53  | 53  | 693.43192 | -0.50 | -0.3809 |
| 1967: | 51  | 4 | 51  | 51  | - | 52  | 3 | 52  | 52  | 694.17587 | -0.50 | 0.0356  |
| 1968: | 50  | 4 | 50  | 50  | - | 51  | 3 | 51  | 51  | 694.91659 | -0.50 | -0.0726 |
| 1969: | 49  | 4 | 49  | 49  | - | 50  | 3 | 50  | 50  | 695.65475 | -0.50 | -0.0310 |
| 1970: | 48  | 4 | 48  | 48  | - | 49  | 3 | 49  | 49  | 696.39022 | -0.50 | 0.0349  |

|       |    |   |    |    |   |    |   |    |    |           |       |         |
|-------|----|---|----|----|---|----|---|----|----|-----------|-------|---------|
| 1971: | 47 | 4 | 47 | 47 | - | 48 | 3 | 48 | 48 | 697.12285 | -0.50 | -0.0204 |
| 1972: | 44 | 4 | 44 | 44 | - | 45 | 3 | 45 | 45 | 699.30459 | -0.50 | 0.0222  |
| 1973: | 43 | 4 | 43 | 43 | - | 44 | 3 | 44 | 44 | 700.02631 | -0.50 | -0.0223 |
| 1974: | 42 | 4 | 42 | 42 | - | 43 | 3 | 43 | 43 | 700.74526 | -0.50 | -0.0951 |
| 1975: | 41 | 4 | 41 | 41 | - | 42 | 3 | 42 | 42 | 701.46151 | -0.50 | -0.1218 |
| 1976: | 40 | 4 | 40 | 40 | - | 41 | 3 | 41 | 41 | 702.17476 | -0.50 | -0.3978 |
| 1977: | 39 | 4 | 39 | 39 | - | 40 | 3 | 40 | 40 | 702.88659 | -0.50 | 0.6616  |
| 1978: | 37 | 4 | 37 | 37 | - | 38 | 3 | 38 | 38 | 704.29920 | -0.50 | 0.0147  |
| 1979: | 36 | 4 | 36 | 36 | - | 37 | 3 | 37 | 37 | 705.00168 | -0.50 | 0.0175  |
| 1980: | 35 | 4 | 35 | 35 | - | 36 | 3 | 36 | 36 | 705.70082 | -0.50 | -0.5459 |
| 1981: | 34 | 4 | 34 | 34 | - | 35 | 3 | 35 | 35 | 706.39817 | -0.50 | -0.1210 |
| 1982: | 33 | 4 | 33 | 33 | - | 34 | 3 | 34 | 34 | 707.09251 | -0.50 | 0.0768  |
| 1983: | 32 | 4 | 32 | 32 | - | 33 | 3 | 33 | 33 | 707.78436 | -0.50 | 0.5721  |
| 1984: | 31 | 4 | 31 | 31 | - | 32 | 3 | 32 | 32 | 708.47216 | -0.50 | -0.1904 |
| 1985: | 30 | 4 | 30 | 30 | - | 31 | 3 | 31 | 31 | 709.15785 | -0.50 | -0.2661 |
| 1986: | 29 | 4 | 29 | 29 | - | 30 | 3 | 30 | 30 | 709.84106 | -0.50 | -0.0204 |
| 1987: | 28 | 4 | 28 | 28 | - | 29 | 3 | 29 | 29 | 710.52081 | -0.50 | -0.4287 |
| 1988: | 27 | 4 | 27 | 27 | - | 28 | 3 | 28 | 28 | 711.19911 | -0.50 | 0.5238  |
| 1989: | 26 | 4 | 26 | 26 | - | 27 | 3 | 27 | 27 | 711.87372 | -0.50 | 0.6016  |
| 1990: | 25 | 4 | 25 | 25 | - | 26 | 3 | 26 | 26 | 712.54546 | -0.50 | 0.6294  |
| 1991: | 24 | 4 | 24 | 24 | - | 25 | 3 | 25 | 25 | 713.21418 | -0.50 | 0.4619  |
| 1992: | 23 | 4 | 23 | 23 | - | 24 | 3 | 24 | 24 | 713.87978 | -0.50 | 0.0037  |
| 1993: | 22 | 4 | 22 | 22 | - | 23 | 3 | 23 | 23 | 714.54341 | -0.50 | 0.4095  |
| 1994: | 21 | 4 | 21 | 21 | - | 22 | 3 | 22 | 22 | 715.20305 | -0.50 | -0.3360 |
| 1995: | 20 | 4 | 20 | 20 | - | 21 | 3 | 21 | 21 | 715.86090 | -0.50 | -0.0282 |
| 1996: | 19 | 4 | 19 | 19 | - | 20 | 3 | 20 | 20 | 716.51570 | -0.50 | 0.0777  |
| 1997: | 18 | 4 | 18 | 18 | - | 19 | 3 | 19 | 19 | 717.16714 | -0.50 | -0.3237 |
| 1998: | 17 | 4 | 17 | 17 | - | 18 | 3 | 18 | 18 | 717.81614 | -0.50 | -0.3077 |
| 1999: | 15 | 4 | 15 | 15 | - | 16 | 3 | 16 | 16 | 719.10590 | -0.50 | 0.0755  |
| 2000: | 14 | 4 | 14 | 14 | - | 15 | 3 | 15 | 15 | 719.74645 | -0.50 | 0.2421  |
| 2001: | 13 | 4 | 13 | 13 | - | 14 | 3 | 14 | 14 | 720.38363 | -0.50 | -0.0851 |
| 2002: | 12 | 4 | 12 | 12 | - | 13 | 3 | 13 | 13 | 721.01835 | -0.50 | 0.0087  |
| 2003: | 11 | 4 | 11 | 11 | - | 12 | 3 | 12 | 12 | 721.64984 | -0.50 | -0.2418 |
| 2004: | 7  | 4 | 7  | 7  | - | 8  | 3 | 8  | 8  | 724.14812 | -0.50 | 0.0281  |
| 2005: | 3  | 4 | 3  | 3  | - | 2  | 3 | 2  | 2  | 730.77622 | -0.50 | -0.4534 |
| 2006: | 4  | 4 | 4  | 4  | - | 3  | 3 | 3  | 3  | 731.36148 | -0.50 | -0.1154 |
| 2007: | 5  | 4 | 5  | 5  | - | 4  | 3 | 4  | 4  | 731.94338 | -0.50 | -0.1706 |
| 2008: | 6  | 4 | 6  | 6  | - | 5  | 3 | 5  | 5  | 732.52289 | -0.50 | 0.3559  |
| 2009: | 7  | 4 | 7  | 7  | - | 6  | 3 | 6  | 6  | 733.09835 | -0.50 | -0.1911 |
| 2010: | 8  | 4 | 8  | 8  | - | 7  | 3 | 7  | 7  | 733.67169 | -0.50 | 0.1233  |
| 2011: | 9  | 4 | 9  | 9  | - | 8  | 3 | 8  | 8  | 734.24184 | -0.50 | 0.2338  |
| 2012: | 10 | 4 | 10 | 10 | - | 9  | 3 | 9  | 9  | 734.80867 | -0.50 | 0.0153  |
| 2013: | 11 | 4 | 11 | 11 | - | 10 | 3 | 10 | 10 | 735.37268 | -0.50 | -0.0273 |
| 2014: | 13 | 4 | 13 | 13 | - | 12 | 3 | 12 | 12 | 736.49177 | -0.50 | -0.0356 |
| 2015: | 14 | 4 | 14 | 14 | - | 13 | 3 | 13 | 13 | 737.04695 | -0.50 | 0.1084  |
| 2016: | 15 | 4 | 15 | 15 | - | 14 | 3 | 14 | 14 | 737.59900 | -0.50 | 0.1378  |
| 2017: | 16 | 4 | 16 | 16 | - | 15 | 3 | 15 | 15 | 738.14793 | -0.50 | 0.0672  |
| 2018: | 17 | 4 | 17 | 17 | - | 16 | 3 | 16 | 16 | 738.69387 | -0.50 | 0.0318  |
| 2019: | 18 | 4 | 18 | 18 | - | 17 | 3 | 17 | 17 | 739.23674 | -0.50 | -0.0438 |
| 2020: | 19 | 4 | 19 | 19 | - | 18 | 3 | 18 | 18 | 739.77640 | -0.50 | -0.2946 |
| 2021: | 20 | 4 | 20 | 20 | - | 19 | 3 | 19 | 19 | 740.31361 | -0.50 | 0.0443  |
| 2022: | 21 | 4 | 21 | 21 | - | 20 | 3 | 20 | 20 | 740.84746 | -0.50 | 0.0678  |
| 2023: | 22 | 4 | 22 | 22 | - | 21 | 3 | 21 | 21 | 741.37840 | -0.50 | 0.2308  |
| 2024: | 23 | 4 | 23 | 23 | - | 22 | 3 | 22 | 22 | 741.90581 | -0.50 | -0.0818 |
| 2025: | 24 | 4 | 24 | 24 | - | 23 | 3 | 23 | 23 | 742.43063 | -0.50 | 0.0749  |
| 2026: | 25 | 4 | 25 | 25 | - | 24 | 3 | 24 | 24 | 742.95232 | -0.50 | 0.1659  |
| 2027: | 26 | 4 | 26 | 26 | - | 25 | 3 | 25 | 25 | 743.47072 | -0.50 | 0.0360  |
| 2028: | 28 | 4 | 28 | 28 | - | 27 | 3 | 27 | 27 | 744.49840 | -0.50 | -0.1166 |
| 2029: | 29 | 4 | 29 | 29 | - | 28 | 3 | 28 | 28 | 745.00771 | -0.50 | -0.0995 |
| 2030: | 30 | 4 | 30 | 30 | - | 29 | 3 | 29 | 29 | 745.51348 | -0.50 | -0.5334 |
| 2031: | 31 | 4 | 31 | 31 | - | 30 | 3 | 30 | 30 | 746.01724 | -0.50 | 0.1165  |
| 2032: | 32 | 4 | 32 | 32 | - | 31 | 3 | 31 | 31 | 746.51708 | -0.50 | -0.0547 |
| 2033: | 33 | 4 | 33 | 33 | - | 32 | 3 | 32 | 32 | 747.01382 | -0.50 | -0.2222 |
| 2034: | 34 | 4 | 34 | 34 | - | 33 | 3 | 33 | 33 | 747.50790 | -0.50 | 0.0590  |
| 2035: | 36 | 4 | 36 | 36 | - | 35 | 3 | 35 | 35 | 748.48612 | -0.50 | 0.0276  |
| 2036: | 37 | 4 | 37 | 37 | - | 36 | 3 | 36 | 36 | 748.97043 | -0.50 | -0.1050 |
| 2037: | 38 | 4 | 38 | 38 | - | 37 | 3 | 37 | 37 | 749.45243 | -0.50 | 0.5810  |
| 2038: | 39 | 4 | 39 | 39 | - | 38 | 3 | 38 | 38 | 749.93002 | -0.50 | -0.0094 |
| 2039: | 40 | 4 | 40 | 40 | - | 39 | 3 | 39 | 39 | 750.40511 | -0.50 | 0.0389  |
| 2040: | 41 | 4 | 41 | 41 | - | 40 | 3 | 40 | 40 | 750.87698 | -0.50 | 0.0109  |
| 2041: | 42 | 4 | 42 | 42 | - | 41 | 3 | 41 | 41 | 751.34521 | -0.50 | -0.5084 |

|       |     |   |     |     |   |     |   |     |     |           |       |         |
|-------|-----|---|-----|-----|---|-----|---|-----|-----|-----------|-------|---------|
| 2042: | 44  | 4 | 44  | 44  | - | 43  | 3 | 43  | 43  | 752.27387 | -0.50 | 0.1190  |
| 2043: | 45  | 4 | 45  | 45  | - | 44  | 3 | 44  | 44  | 752.73296 | -0.50 | -0.0642 |
| 2044: | 46  | 4 | 46  | 46  | - | 45  | 3 | 45  | 45  | 753.18920 | -0.50 | 0.0714  |
| 2045: | 47  | 4 | 47  | 47  | - | 46  | 3 | 46  | 46  | 753.64146 | -0.50 | -0.5992 |
| 2046: | 48  | 4 | 48  | 48  | - | 47  | 3 | 47  | 47  | 754.09227 | -0.50 | 0.4591  |
| 2047: | 49  | 4 | 49  | 49  | - | 48  | 3 | 48  | 48  | 754.53838 | -0.50 | 0.0012  |
| 2048: | 52  | 4 | 52  | 52  | - | 51  | 3 | 51  | 51  | 755.85891 | -0.50 | -0.0181 |
| 2049: | 53  | 4 | 53  | 53  | - | 52  | 3 | 52  | 52  | 756.29353 | -0.50 | 0.8204  |
| 2050: | 54  | 4 | 54  | 54  | - | 53  | 3 | 53  | 53  | 756.72327 | -0.50 | -0.0119 |
| 2051: | 55  | 4 | 55  | 55  | - | 54  | 3 | 54  | 54  | 757.15069 | -0.50 | 0.0502  |
| 2052: | 57  | 4 | 57  | 57  | - | 56  | 3 | 56  | 56  | 757.99562 | -0.50 | -0.0723 |
| 2053: | 58  | 4 | 58  | 58  | - | 57  | 3 | 57  | 57  | 758.41327 | -0.50 | -0.1066 |
| 2054: | 59  | 4 | 59  | 59  | - | 58  | 3 | 58  | 58  | 758.82767 | -0.50 | -0.1561 |
| 2055: | 60  | 4 | 60  | 60  | - | 59  | 3 | 59  | 59  | 759.23918 | -0.50 | 0.1442  |
| 2056: | 61  | 4 | 61  | 61  | - | 60  | 3 | 60  | 60  | 759.64668 | -0.50 | -0.3205 |
| 2057: | 62  | 4 | 62  | 62  | - | 61  | 3 | 61  | 61  | 760.05162 | -0.50 | -0.0951 |
| 2058: | 63  | 4 | 63  | 63  | - | 62  | 3 | 62  | 62  | 760.45362 | -0.50 | 0.4456  |
| 2059: | 64  | 4 | 64  | 64  | - | 63  | 3 | 63  | 63  | 760.85121 | -0.50 | -0.1633 |
| 2060: | 66  | 4 | 66  | 66  | - | 65  | 3 | 65  | 65  | 761.63810 | -0.50 | 0.1306  |
| 2061: | 68  | 4 | 68  | 68  | - | 67  | 3 | 67  | 67  | 762.41160 | -0.50 | 0.1379  |
| 2062: | 69  | 4 | 69  | 69  | - | 68  | 3 | 68  | 68  | 762.79312 | -0.50 | -0.1617 |
| 2063: | 70  | 4 | 70  | 70  | - | 69  | 3 | 69  | 69  | 763.17113 | -0.50 | -0.6799 |
| 2064: | 71  | 4 | 71  | 71  | - | 70  | 3 | 70  | 70  | 763.54714 | -0.50 | 0.0984  |
| 2065: | 72  | 4 | 72  | 72  | - | 71  | 3 | 71  | 71  | 763.91899 | -0.50 | 0.0184  |
| 2066: | 74  | 4 | 74  | 74  | - | 73  | 3 | 73  | 73  | 764.65316 | -0.50 | 0.2546  |
| 2067: | 75  | 4 | 75  | 75  | - | 74  | 3 | 74  | 74  | 765.01498 | -0.50 | 0.0811  |
| 2068: | 77  | 4 | 77  | 77  | - | 76  | 3 | 76  | 76  | 765.72903 | -0.50 | 0.1171  |
| 2069: | 78  | 4 | 78  | 78  | - | 77  | 3 | 77  | 77  | 766.08093 | -0.50 | 0.0071  |
| 2070: | 79  | 4 | 79  | 79  | - | 78  | 3 | 78  | 78  | 766.42979 | -0.50 | 0.1953  |
| 2071: | 80  | 4 | 80  | 80  | - | 79  | 3 | 79  | 79  | 766.77492 | -0.50 | -0.0030 |
| 2072: | 81  | 4 | 81  | 81  | - | 80  | 3 | 80  | 80  | 767.11661 | -0.50 | -0.2925 |
| 2073: | 84  | 4 | 84  | 84  | - | 83  | 3 | 83  | 83  | 768.12318 | -0.50 | 0.4843  |
| 2074: | 85  | 4 | 85  | 85  | - | 84  | 3 | 84  | 84  | 768.45063 | -1.00 | -0.5974 |
| 2075: | 86  | 4 | 86  | 86  | - | 85  | 3 | 85  | 85  | 768.77636 | -0.50 | -0.0241 |
| 2076: | 87  | 4 | 87  | 87  | - | 86  | 3 | 86  | 86  | 769.09823 | -0.50 | 0.0697  |
| 2077: | 88  | 4 | 88  | 88  | - | 87  | 3 | 87  | 87  | 769.41651 | -0.50 | -0.0408 |
| 2078: | 89  | 4 | 89  | 89  | - | 88  | 3 | 88  | 88  | 769.73123 | -0.50 | -0.3202 |
| 2079: | 90  | 4 | 90  | 90  | - | 89  | 3 | 89  | 89  | 770.04299 | -0.50 | -0.1633 |
| 2080: | 91  | 4 | 91  | 91  | - | 90  | 3 | 90  | 90  | 770.35123 | -0.50 | -0.1248 |
| 2081: | 92  | 4 | 92  | 92  | - | 91  | 3 | 91  | 91  | 770.65609 | -0.50 | -0.0592 |
| 2082: | 93  | 4 | 93  | 93  | - | 92  | 3 | 92  | 92  | 770.95744 | -0.50 | -0.0913 |
| 2083: | 94  | 4 | 94  | 94  | - | 93  | 3 | 93  | 93  | 771.25556 | -0.50 | 0.0642  |
| 2084: | 95  | 4 | 95  | 95  | - | 94  | 3 | 94  | 94  | 771.55052 | -0.50 | 0.4828  |
| 2085: | 96  | 4 | 96  | 96  | - | 95  | 3 | 95  | 95  | 771.84062 | -0.50 | -0.5302 |
| 2086: | 97  | 4 | 97  | 97  | - | 96  | 3 | 96  | 96  | 772.12858 | -0.50 | -0.2495 |
| 2087: | 98  | 4 | 98  | 98  | - | 97  | 3 | 97  | 97  | 772.41325 | -0.50 | 0.1803  |
| 2088: | 100 | 4 | 100 | 100 | - | 99  | 3 | 99  | 99  | 772.97162 | -0.50 | 0.4089  |
| 2089: | 101 | 4 | 101 | 101 | - | 100 | 3 | 100 | 100 | 773.24498 | -0.50 | -0.1216 |
| 2090: | 103 | 4 | 103 | 103 | - | 102 | 3 | 102 | 102 | 773.78202 | -0.50 | -0.4751 |
| 2091: | 100 | 5 | 100 | 100 | - | 101 | 4 | 101 | 101 | 649.79609 | -1.50 | -1.2258 |
| 2092: | 98  | 5 | 98  | 98  | - | 99  | 4 | 99  | 99  | 651.52515 | -1.00 | -0.2547 |
| 2093: | 95  | 5 | 95  | 95  | - | 96  | 4 | 96  | 96  | 654.09806 | -1.00 | -0.7155 |
| 2094: | 94  | 5 | 94  | 94  | - | 95  | 4 | 95  | 95  | 654.95157 | -1.00 | 0.0245  |
| 2095: | 93  | 5 | 93  | 93  | - | 94  | 4 | 94  | 94  | 655.80158 | -1.00 | -0.2184 |
| 2096: | 92  | 5 | 92  | 92  | - | 93  | 4 | 93  | 93  | 656.64932 | -1.00 | -0.2099 |
| 2097: | 91  | 5 | 91  | 91  | - | 92  | 4 | 92  | 92  | 657.49485 | -0.50 | 0.1143  |
| 2098: | 90  | 5 | 90  | 90  | - | 91  | 4 | 91  | 91  | 658.33732 | -0.50 | -0.0915 |
| 2099: | 89  | 5 | 89  | 89  | - | 90  | 4 | 90  | 90  | 659.17703 | -0.50 | -0.5232 |
| 2100: | 88  | 5 | 88  | 88  | - | 89  | 4 | 89  | 89  | 660.01554 | -0.50 | 0.3836  |
| 2101: | 86  | 5 | 86  | 86  | - | 87  | 4 | 87  | 87  | 661.68252 | -0.50 | -0.2101 |
| 2102: | 85  | 5 | 85  | 85  | - | 86  | 4 | 86  | 86  | 662.51239 | -0.50 | -0.3021 |
| 2103: | 84  | 5 | 84  | 84  | - | 85  | 4 | 85  | 85  | 663.34023 | -0.50 | 0.1316  |
| 2104: | 83  | 5 | 83  | 83  | - | 84  | 4 | 84  | 84  | 664.16516 | -0.50 | 0.2152  |
| 2105: | 82  | 5 | 82  | 82  | - | 83  | 4 | 83  | 83  | 664.98732 | -0.50 | 0.0931  |
| 2106: | 81  | 5 | 81  | 81  | - | 82  | 4 | 82  | 82  | 665.80717 | -0.50 | 0.2296  |
| 2107: | 80  | 5 | 80  | 80  | - | 81  | 4 | 81  | 81  | 666.62414 | -0.50 | 0.0591  |
| 2108: | 79  | 5 | 79  | 79  | - | 80  | 4 | 80  | 80  | 667.43834 | -0.50 | -0.3042 |
| 2109: | 78  | 5 | 78  | 78  | - | 79  | 4 | 79  | 79  | 668.25066 | -0.50 | 0.0342  |
| 2110: | 75  | 5 | 75  | 75  | - | 76  | 4 | 76  | 76  | 670.67113 | -0.50 | 0.0925  |
| 2111: | 73  | 5 | 73  | 73  | - | 74  | 4 | 74  | 74  | 672.27174 | -0.50 | 0.0828  |
| 2112: | 72  | 5 | 72  | 72  | - | 73  | 4 | 73  | 73  | 673.06805 | -0.50 | -0.0076 |

|       |    |   |    |    |   |    |   |    |    |           |       |         |
|-------|----|---|----|----|---|----|---|----|----|-----------|-------|---------|
| 2113: | 71 | 5 | 71 | 71 | - | 72 | 4 | 72 | 72 | 673.86168 | -0.50 | -0.1657 |
| 2114: | 70 | 5 | 70 | 70 | - | 71 | 4 | 71 | 71 | 674.65318 | -0.50 | 0.1627  |
| 2115: | 69 | 5 | 69 | 69 | - | 70 | 4 | 70 | 70 | 675.44183 | -0.50 | 0.2622  |
| 2116: | 68 | 5 | 68 | 68 | - | 69 | 4 | 69 | 69 | 676.22758 | -0.50 | 0.0871  |
| 2117: | 67 | 5 | 67 | 67 | - | 68 | 4 | 68 | 68 | 677.00994 | -0.50 | -0.8482 |
| 2118: | 65 | 5 | 65 | 65 | - | 66 | 4 | 66 | 66 | 678.56929 | -0.50 | -0.1817 |
| 2119: | 64 | 5 | 64 | 64 | - | 65 | 4 | 65 | 65 | 679.34498 | -0.50 | 0.1290  |
| 2120: | 63 | 5 | 63 | 63 | - | 64 | 4 | 64 | 64 | 680.11756 | -0.50 | -0.0227 |
| 2121: | 61 | 5 | 61 | 61 | - | 62 | 4 | 62 | 62 | 681.65512 | -0.50 | 0.0342  |
| 2122: | 60 | 5 | 60 | 60 | - | 61 | 4 | 61 | 61 | 682.41909 | -0.50 | -0.7582 |
| 2123: | 59 | 5 | 59 | 59 | - | 60 | 4 | 60 | 60 | 683.18208 | -0.50 | 0.1347  |
| 2124: | 57 | 5 | 57 | 57 | - | 58 | 4 | 58 | 58 | 684.69821 | -0.50 | 0.0845  |
| 2125: | 55 | 5 | 55 | 55 | - | 56 | 4 | 56 | 56 | 686.20354 | -0.50 | -0.0506 |
| 2126: | 54 | 5 | 54 | 54 | - | 55 | 4 | 55 | 55 | 686.95233 | -0.50 | 0.0363  |
| 2127: | 52 | 5 | 52 | 52 | - | 53 | 4 | 53 | 53 | 688.44170 | -0.50 | 0.0812  |
| 2128: | 51 | 5 | 51 | 51 | - | 52 | 4 | 52 | 52 | 689.18213 | -0.50 | -0.1017 |
| 2129: | 50 | 5 | 50 | 50 | - | 51 | 4 | 51 | 51 | 689.92007 | -0.50 | -0.0687 |
| 2130: | 49 | 5 | 49 | 49 | - | 50 | 4 | 50 | 50 | 690.65529 | -0.50 | -0.0455 |
| 2131: | 47 | 5 | 47 | 47 | - | 48 | 4 | 48 | 48 | 692.11747 | -0.50 | -0.1100 |
| 2132: | 46 | 5 | 46 | 46 | - | 47 | 4 | 47 | 47 | 692.84421 | -0.50 | -0.4087 |
| 2133: | 45 | 5 | 45 | 45 | - | 46 | 4 | 46 | 46 | 693.56887 | -0.50 | -0.0589 |
| 2134: | 44 | 5 | 44 | 44 | - | 45 | 4 | 45 | 45 | 694.29055 | -0.50 | 0.0439  |
| 2135: | 43 | 5 | 43 | 43 | - | 44 | 4 | 44 | 44 | 695.00962 | -0.50 | 0.2742  |
| 2136: | 42 | 5 | 42 | 42 | - | 43 | 4 | 43 | 43 | 695.72541 | -0.50 | -0.0334 |
| 2137: | 41 | 5 | 41 | 41 | - | 42 | 4 | 42 | 42 | 696.43890 | -0.50 | 0.1058  |
| 2138: | 40 | 5 | 40 | 40 | - | 41 | 4 | 41 | 41 | 697.14949 | -0.50 | 0.0962  |
| 2139: | 38 | 5 | 38 | 38 | - | 39 | 4 | 39 | 39 | 698.56256 | -0.50 | 0.2390  |
| 2140: | 34 | 5 | 34 | 34 | - | 35 | 4 | 35 | 35 | 701.35509 | -0.50 | 0.1316  |
| 2141: | 33 | 5 | 33 | 33 | - | 34 | 4 | 34 | 34 | 702.04615 | -0.50 | -0.0207 |
| 2142: | 32 | 5 | 32 | 32 | - | 33 | 4 | 33 | 33 | 702.73466 | -0.50 | 0.0650  |
| 2143: | 30 | 5 | 30 | 30 | - | 31 | 4 | 31 | 31 | 704.10310 | -0.50 | 0.0391  |
| 2144: | 29 | 5 | 29 | 29 | - | 30 | 4 | 30 | 30 | 704.78317 | -0.50 | 0.0766  |
| 2145: | 28 | 5 | 28 | 28 | - | 29 | 4 | 29 | 29 | 705.46040 | -0.50 | 0.0808  |
| 2146: | 27 | 5 | 27 | 27 | - | 28 | 4 | 28 | 28 | 706.13485 | -0.50 | 0.1161  |
| 2147: | 26 | 5 | 26 | 26 | - | 27 | 4 | 27 | 27 | 706.80645 | -0.50 | 0.1173  |
| 2148: | 25 | 5 | 25 | 25 | - | 26 | 4 | 26 | 26 | 707.47517 | -0.50 | 0.0590  |
| 2149: | 24 | 5 | 24 | 24 | - | 25 | 4 | 25 | 25 | 708.14116 | -0.50 | 0.0959  |
| 2150: | 23 | 5 | 23 | 23 | - | 24 | 4 | 24 | 24 | 708.80423 | -0.50 | 0.0426  |
| 2151: | 21 | 5 | 21 | 21 | - | 22 | 4 | 22 | 22 | 710.12181 | -0.50 | -0.1159 |
| 2152: | 18 | 5 | 18 | 18 | - | 19 | 4 | 19 | 19 | 712.07772 | -0.50 | 0.5272  |
| 2153: | 16 | 5 | 16 | 16 | - | 17 | 4 | 17 | 17 | 713.36716 | -0.50 | 0.7378  |
| 2154: | 14 | 5 | 14 | 14 | - | 15 | 4 | 15 | 15 | 714.64466 | -0.50 | 0.4778  |
| 2155: | 13 | 5 | 13 | 13 | - | 14 | 4 | 14 | 14 | 715.27861 | -0.50 | -0.1394 |
| 2156: | 11 | 5 | 11 | 11 | - | 12 | 4 | 12 | 12 | 716.53890 | -0.50 | -0.3345 |
| 2157: | 9  | 5 | 9  | 9  | - | 10 | 4 | 10 | 10 | 717.78876 | -0.50 | 0.6043  |
| 2158: | 8  | 5 | 8  | 8  | - | 9  | 4 | 9  | 9  | 718.40898 | -0.50 | 0.7120  |
| 2159: | 7  | 5 | 7  | 7  | - | 8  | 4 | 8  | 8  | 719.02522 | -0.50 | -0.2551 |
| 2160: | 6  | 5 | 6  | 6  | - | 7  | 4 | 7  | 7  | 719.63920 | -0.50 | -0.5722 |
| 2161: | 5  | 5 | 5  | 5  | - | 6  | 4 | 6  | 6  | 720.25095 | -0.50 | -0.2046 |
| 2162: | 2  | 5 | 2  | 2  | - | 3  | 4 | 3  | 3  | 722.06788 | -0.50 | 0.1143  |
| 2163: | 7  | 5 | 7  | 7  | - | 6  | 4 | 6  | 6  | 727.93146 | -0.50 | -0.2491 |
| 2164: | 8  | 5 | 8  | 8  | - | 7  | 4 | 7  | 7  | 728.50175 | -0.50 | -0.0324 |
| 2165: | 13 | 5 | 13 | 13 | - | 12 | 4 | 12 | 12 | 731.30713 | -0.50 | -0.1197 |
| 2166: | 14 | 5 | 14 | 14 | - | 13 | 4 | 13 | 13 | 731.85977 | -0.50 | 0.4407  |
| 2167: | 15 | 5 | 15 | 15 | - | 14 | 4 | 14 | 14 | 732.40837 | -0.50 | -0.0231 |
| 2168: | 16 | 5 | 16 | 16 | - | 15 | 4 | 15 | 15 | 732.95407 | -0.50 | -0.3660 |
| 2169: | 18 | 5 | 18 | 18 | - | 17 | 4 | 17 | 17 | 734.03710 | -0.50 | -0.3397 |
| 2170: | 19 | 5 | 19 | 19 | - | 18 | 4 | 18 | 18 | 734.57436 | -0.50 | -0.0308 |
| 2171: | 20 | 5 | 20 | 20 | - | 19 | 4 | 19 | 19 | 735.10852 | -0.50 | 0.2185  |
| 2172: | 21 | 5 | 21 | 21 | - | 20 | 4 | 20 | 20 | 735.63932 | -0.50 | 0.1532  |
| 2173: | 22 | 5 | 22 | 22 | - | 21 | 4 | 21 | 21 | 736.16701 | -0.50 | 0.0280  |
| 2174: | 23 | 5 | 23 | 23 | - | 22 | 4 | 22 | 22 | 736.69193 | -0.50 | 0.1880  |
| 2175: | 24 | 5 | 24 | 24 | - | 23 | 4 | 23 | 23 | 737.21355 | -0.50 | 0.1081  |
| 2176: | 25 | 5 | 25 | 25 | - | 24 | 4 | 24 | 24 | 737.73187 | -0.50 | -0.2069 |
| 2177: | 27 | 5 | 27 | 27 | - | 26 | 4 | 26 | 26 | 738.76057 | -0.50 | 0.4379  |
| 2178: | 28 | 5 | 28 | 28 | - | 27 | 4 | 27 | 27 | 739.26968 | -0.50 | 0.1375  |
| 2179: | 29 | 5 | 29 | 29 | - | 28 | 4 | 28 | 28 | 739.77640 | -0.50 | 0.5319  |
| 2180: | 30 | 5 | 30 | 30 | - | 29 | 4 | 29 | 29 | 740.27916 | -0.50 | 0.0560  |
| 2181: | 31 | 5 | 31 | 31 | - | 30 | 4 | 30 | 30 | 740.77908 | -0.50 | -0.1652 |
| 2182: | 33 | 5 | 33 | 33 | - | 32 | 4 | 32 | 32 | 741.77025 | -0.50 | 0.0262  |
| 2183: | 34 | 5 | 34 | 34 | - | 33 | 4 | 33 | 33 | 742.26119 | -0.50 | 0.1388  |

|       |    |   |    |    |   |    |   |    |    |           |       |         |
|-------|----|---|----|----|---|----|---|----|----|-----------|-------|---------|
| 2184: | 35 | 5 | 35 | 35 | - | 34 | 4 | 34 | 34 | 742.74900 | -0.50 | 0.2360  |
| 2185: | 36 | 5 | 36 | 36 | - | 35 | 4 | 35 | 35 | 743.23344 | -0.50 | 0.0828  |
| 2186: | 37 | 5 | 37 | 37 | - | 36 | 4 | 36 | 36 | 743.71479 | -0.50 | -0.0359 |
| 2187: | 38 | 5 | 38 | 38 | - | 37 | 4 | 37 | 37 | 744.19315 | -0.50 | -0.0150 |
| 2188: | 39 | 5 | 39 | 39 | - | 38 | 4 | 38 | 38 | 744.66845 | -0.50 | 0.0804  |
| 2189: | 40 | 5 | 40 | 40 | - | 39 | 4 | 39 | 39 | 745.14037 | -0.50 | -0.0645 |
| 2190: | 41 | 5 | 41 | 41 | - | 40 | 4 | 40 | 40 | 745.60933 | -0.50 | -0.0249 |
| 2191: | 42 | 5 | 42 | 42 | - | 41 | 4 | 41 | 41 | 746.07494 | -0.50 | -0.1856 |
| 2192: | 43 | 5 | 43 | 43 | - | 42 | 4 | 42 | 42 | 746.53770 | -0.50 | -0.0417 |
| 2193: | 44 | 5 | 44 | 44 | - | 43 | 4 | 43 | 43 | 746.99723 | -0.50 | 0.0319  |
| 2194: | 46 | 5 | 46 | 46 | - | 45 | 4 | 45 | 45 | 747.90649 | -0.50 | -0.1216 |
| 2195: | 47 | 5 | 47 | 47 | - | 46 | 4 | 46 | 46 | 748.35664 | -0.50 | 0.0813  |
| 2196: | 48 | 5 | 48 | 48 | - | 47 | 4 | 47 | 47 | 748.80346 | -0.50 | 0.1342  |
| 2197: | 49 | 5 | 49 | 49 | - | 48 | 4 | 48 | 48 | 749.24686 | -0.50 | -0.0480 |
| 2198: | 50 | 5 | 50 | 50 | - | 49 | 4 | 49 | 49 | 749.68730 | -0.50 | -0.0002 |
| 2199: | 53 | 5 | 53 | 53 | - | 52 | 4 | 52 | 52 | 750.98937 | -0.50 | 0.0844  |
| 2200: | 54 | 5 | 54 | 54 | - | 53 | 4 | 53 | 53 | 751.41689 | -0.50 | 0.0232  |
| 2201: | 55 | 5 | 55 | 55 | - | 54 | 4 | 54 | 54 | 751.84069 | -0.50 | -0.5425 |
| 2202: | 57 | 5 | 57 | 57 | - | 56 | 4 | 56 | 56 | 752.68039 | -0.50 | 0.0929  |
| 2203: | 58 | 5 | 58 | 58 | - | 57 | 4 | 57 | 57 | 753.09514 | -0.50 | 0.1543  |
| 2204: | 59 | 5 | 59 | 59 | - | 58 | 4 | 58 | 58 | 753.50659 | -0.50 | 0.1517  |
| 2205: | 60 | 5 | 60 | 60 | - | 59 | 4 | 59 | 59 | 753.91476 | -0.50 | 0.1101  |
| 2206: | 64 | 5 | 64 | 64 | - | 63 | 4 | 63 | 63 | 755.51481 | -0.50 | -0.1724 |
| 2207: | 65 | 5 | 65 | 65 | - | 64 | 4 | 64 | 64 | 755.90698 | -0.50 | 0.0687  |
| 2208: | 67 | 5 | 67 | 67 | - | 66 | 4 | 66 | 66 | 756.68073 | -0.50 | -0.2180 |
| 2209: | 69 | 5 | 69 | 69 | - | 68 | 4 | 68 | 68 | 757.44208 | -0.50 | 0.2249  |
| 2210: | 70 | 5 | 70 | 70 | - | 69 | 4 | 69 | 69 | 757.81753 | -0.50 | 0.1579  |
| 2211: | 71 | 5 | 71 | 71 | - | 70 | 4 | 70 | 70 | 758.18939 | -0.50 | -0.2011 |
| 2212: | 85 | 6 | 85 | 85 | - | 86 | 5 | 86 | 86 | 657.62427 | -1.50 | 1.1724  |
| 2213: | 83 | 6 | 83 | 83 | - | 84 | 5 | 84 | 84 | 659.27001 | -0.50 | 0.4442  |
| 2214: | 82 | 6 | 82 | 82 | - | 83 | 5 | 83 | 83 | 660.08947 | -0.50 | 0.5157  |
| 2215: | 81 | 6 | 81 | 81 | - | 82 | 5 | 82 | 82 | 660.90549 | -0.50 | -0.2834 |
| 2216: | 79 | 6 | 79 | 79 | - | 80 | 5 | 80 | 80 | 662.53173 | -0.50 | 0.0439  |
| 2217: | 78 | 6 | 78 | 78 | - | 79 | 5 | 79 | 79 | 663.34023 | -0.50 | -0.5410 |
| 2218: | 77 | 6 | 77 | 77 | - | 78 | 5 | 78 | 78 | 664.14718 | -0.50 | -0.0892 |
| 2219: | 76 | 6 | 76 | 76 | - | 77 | 5 | 77 | 77 | 664.95105 | -0.50 | -0.1262 |
| 2220: | 75 | 6 | 75 | 75 | - | 76 | 5 | 76 | 76 | 665.75212 | -0.50 | -0.3678 |
| 2221: | 74 | 6 | 74 | 74 | - | 75 | 5 | 75 | 75 | 666.55087 | -0.50 | -0.3296 |
| 2222: | 73 | 6 | 73 | 73 | - | 74 | 5 | 74 | 74 | 667.34825 | -0.50 | 0.9428  |
| 2223: | 72 | 6 | 72 | 72 | - | 73 | 5 | 73 | 73 | 668.14069 | -0.50 | -0.1162 |
| 2224: | 71 | 6 | 71 | 71 | - | 72 | 5 | 72 | 72 | 668.93145 | -0.50 | -0.2423 |
| 2225: | 70 | 6 | 70 | 70 | - | 71 | 5 | 71 | 71 | 669.71990 | -0.50 | -0.0610 |
| 2226: | 69 | 6 | 69 | 69 | - | 70 | 5 | 70 | 70 | 670.50408 | -1.50 | -1.5280 |
| 2227: | 68 | 6 | 68 | 68 | - | 69 | 5 | 69 | 69 | 671.28849 | -0.50 | -0.1388 |
| 2228: | 67 | 6 | 67 | 67 | - | 68 | 5 | 68 | 68 | 672.06954 | -0.50 | 0.5208  |
| 2229: | 66 | 6 | 66 | 66 | - | 67 | 5 | 67 | 67 | 672.84665 | -0.50 | -0.1245 |
| 2230: | 65 | 6 | 65 | 65 | - | 66 | 5 | 66 | 66 | 673.62168 | -0.50 | -0.2105 |
| 2231: | 64 | 6 | 64 | 64 | - | 65 | 5 | 65 | 65 | 674.39429 | -0.50 | -0.0727 |
| 2232: | 63 | 6 | 63 | 63 | - | 64 | 5 | 64 | 64 | 675.16434 | -0.50 | 0.1533  |
| 2233: | 62 | 6 | 62 | 62 | - | 63 | 5 | 63 | 63 | 675.93144 | -0.50 | 0.0821  |
| 2234: | 61 | 6 | 61 | 61 | - | 62 | 5 | 62 | 62 | 676.69600 | -0.50 | 0.1279  |
| 2235: | 60 | 6 | 60 | 60 | - | 61 | 5 | 61 | 61 | 677.45823 | -0.50 | 0.5053  |
| 2236: | 59 | 6 | 59 | 59 | - | 60 | 5 | 60 | 60 | 678.21724 | -0.50 | 0.3287  |
| 2237: | 57 | 6 | 57 | 57 | - | 58 | 5 | 58 | 58 | 679.72616 | -0.50 | -1.1084 |
| 2238: | 56 | 6 | 56 | 56 | - | 57 | 5 | 57 | 57 | 680.47789 | -0.50 | -0.5401 |
| 2239: | 55 | 6 | 55 | 55 | - | 56 | 5 | 56 | 56 | 681.22737 | -0.50 | 0.4622  |
| 2240: | 54 | 6 | 54 | 54 | - | 55 | 5 | 55 | 55 | 681.97280 | -0.50 | 0.1029  |
| 2241: | 53 | 6 | 53 | 53 | - | 54 | 5 | 54 | 54 | 682.71609 | -0.50 | 0.2964  |
| 2242: | 52 | 6 | 52 | 52 | - | 53 | 5 | 53 | 53 | 683.45638 | -0.50 | 0.1874  |
| 2243: | 51 | 6 | 51 | 51 | - | 52 | 5 | 52 | 52 | 684.19372 | -0.50 | -0.1697 |
| 2244: | 50 | 6 | 50 | 50 | - | 51 | 5 | 51 | 51 | 684.92856 | -0.50 | -0.3204 |
| 2245: | 49 | 6 | 49 | 49 | - | 50 | 5 | 50 | 50 | 685.66098 | -0.50 | -0.1801 |
| 2246: | 48 | 6 | 48 | 48 | - | 49 | 5 | 49 | 49 | 686.39103 | -0.50 | 0.3056  |
| 2247: | 47 | 6 | 47 | 47 | - | 48 | 5 | 48 | 48 | 687.11864 | -1.00 | 1.0713  |
| 2248: | 46 | 6 | 46 | 46 | - | 47 | 5 | 47 | 47 | 687.84159 | -0.50 | -0.0984 |
| 2249: | 45 | 6 | 45 | 45 | - | 46 | 5 | 46 | 46 | 688.56310 | -0.50 | 0.0209  |
| 2250: | 44 | 6 | 44 | 44 | - | 45 | 5 | 45 | 45 | 689.28175 | -0.50 | 0.0139  |
| 2251: | 43 | 6 | 43 | 43 | - | 44 | 5 | 44 | 44 | 689.99786 | -0.50 | 0.2050  |
| 2252: | 42 | 6 | 42 | 42 | - | 43 | 5 | 43 | 43 | 690.71054 | -0.50 | -0.2912 |
| 2253: | 38 | 6 | 38 | 38 | - | 39 | 5 | 39 | 39 | 693.53601 | -0.50 | -0.0071 |
| 2254: | 36 | 6 | 36 | 36 | - | 37 | 5 | 37 | 37 | 694.93192 | -0.50 | -0.1146 |

|       |    |   |    |    |   |    |   |    |    |           |       |         |
|-------|----|---|----|----|---|----|---|----|----|-----------|-------|---------|
| 2255: | 35 | 6 | 35 | 35 | - | 36 | 5 | 36 | 36 | 695.62606 | -0.50 | 0.1765  |
| 2256: | 33 | 6 | 33 | 33 | - | 34 | 5 | 34 | 34 | 697.00530 | -0.50 | 0.0616  |
| 2257: | 32 | 6 | 32 | 32 | - | 33 | 5 | 33 | 33 | 697.69071 | -0.50 | -0.0252 |
| 2258: | 31 | 6 | 31 | 31 | - | 32 | 5 | 32 | 32 | 698.37365 | -0.50 | 0.2112  |
| 2259: | 30 | 6 | 30 | 30 | - | 31 | 5 | 31 | 31 | 699.05340 | -0.50 | 0.0556  |
| 2260: | 29 | 6 | 29 | 29 | - | 30 | 5 | 30 | 30 | 699.73047 | -0.50 | 0.0225  |
| 2261: | 28 | 6 | 28 | 28 | - | 29 | 5 | 29 | 29 | 700.40553 | -0.50 | 0.7865  |
| 2262: | 27 | 6 | 27 | 27 | - | 28 | 5 | 28 | 28 | 701.07674 | -0.50 | 0.5123  |
| 2263: | 25 | 6 | 25 | 25 | - | 26 | 5 | 26 | 26 | 702.41048 | -0.50 | -0.2620 |
| 2264: | 24 | 6 | 24 | 24 | - | 25 | 5 | 25 | 25 | 703.07413 | -0.50 | 0.3672  |
| 2265: | 23 | 6 | 23 | 23 | - | 24 | 5 | 24 | 24 | 703.73365 | -0.50 | -0.3032 |
| 2266: | 22 | 6 | 22 | 22 | - | 23 | 5 | 23 | 23 | 704.39141 | -0.50 | 0.1016  |
| 2267: | 19 | 6 | 19 | 19 | - | 20 | 5 | 20 | 20 | 706.34646 | -0.50 | 0.1432  |
| 2268: | 18 | 6 | 18 | 18 | - | 19 | 5 | 19 | 19 | 706.99257 | -0.50 | 0.2852  |
| 2269: | 17 | 6 | 17 | 17 | - | 18 | 5 | 18 | 18 | 707.63568 | -0.50 | 0.2858  |
| 2270: | 15 | 6 | 15 | 15 | - | 16 | 5 | 16 | 16 | 708.91339 | -0.50 | 0.3714  |
| 2271: | 13 | 6 | 13 | 13 | - | 14 | 5 | 14 | 14 | 710.17950 | -0.50 | 0.3477  |
| 2272: | 10 | 6 | 10 | 10 | - | 9  | 5 | 9  | 9  | 724.46289 | -0.50 | 0.2590  |
| 2273: | 11 | 6 | 11 | 11 | - | 10 | 5 | 10 | 10 | 725.02085 | -0.50 | 0.0768  |
| 2274: | 12 | 6 | 12 | 12 | - | 11 | 5 | 11 | 11 | 725.57651 | -0.50 | 0.5966  |
| 2275: | 18 | 6 | 18 | 18 | - | 17 | 5 | 17 | 17 | 728.84342 | -0.50 | -0.0168 |
| 2276: | 19 | 6 | 19 | 19 | - | 18 | 5 | 18 | 18 | 729.37805 | -0.50 | 0.6245  |
| 2277: | 21 | 6 | 21 | 21 | - | 20 | 5 | 20 | 20 | 730.43664 | -0.50 | 0.3657  |
| 2278: | 23 | 6 | 23 | 23 | - | 22 | 5 | 22 | 22 | 731.48308 | -0.50 | 0.1611  |
| 2279: | 24 | 6 | 24 | 24 | - | 23 | 5 | 23 | 23 | 732.00167 | -0.50 | 0.0178  |
| 2280: | 26 | 6 | 26 | 26 | - | 25 | 5 | 25 | 25 | 733.03067 | -0.50 | 0.7535  |
| 2281: | 27 | 6 | 27 | 27 | - | 26 | 5 | 26 | 26 | 733.53995 | -0.50 | 0.5125  |
| 2282: | 28 | 6 | 28 | 28 | - | 27 | 5 | 27 | 27 | 734.04665 | -0.50 | 0.7723  |
| 2283: | 29 | 6 | 29 | 29 | - | 28 | 5 | 28 | 28 | 734.54932 | -0.50 | 0.0877  |
| 2284: | 31 | 6 | 31 | 31 | - | 30 | 5 | 30 | 30 | 735.54749 | -0.50 | 0.8254  |
| 2285: | 32 | 6 | 32 | 32 | - | 31 | 5 | 31 | 31 | 736.04089 | -0.50 | 0.1576  |
| 2286: | 36 | 6 | 36 | 36 | - | 35 | 5 | 35 | 35 | 737.98602 | -0.50 | 0.1221  |
| 2287: | 37 | 6 | 37 | 37 | - | 36 | 5 | 36 | 36 | 738.46473 | -0.50 | 0.3421  |
| 2288: | 38 | 6 | 38 | 38 | - | 37 | 5 | 37 | 37 | 738.93946 | -0.50 | -0.2873 |
| 2289: | 40 | 6 | 40 | 40 | - | 39 | 5 | 39 | 39 | 739.88141 | -0.50 | 0.3557  |
| 2290: | 41 | 6 | 41 | 41 | - | 40 | 5 | 40 | 40 | 740.34705 | -0.50 | 0.0582  |
| 2291: | 44 | 6 | 44 | 44 | - | 43 | 5 | 43 | 43 | 741.72534 | -0.50 | -0.5401 |
| 2292: | 45 | 6 | 45 | 45 | - | 44 | 5 | 44 | 44 | 742.17888 | -0.50 | -0.3046 |
| 2293: | 47 | 6 | 47 | 47 | - | 46 | 5 | 46 | 46 | 743.07638 | -0.50 | 0.1042  |
| 2294: | 48 | 6 | 48 | 48 | - | 47 | 5 | 47 | 47 | 743.52022 | -0.50 | 0.1676  |
| 2295: | 49 | 6 | 49 | 49 | - | 48 | 5 | 48 | 48 | 743.95971 | -0.50 | -0.9328 |
| 2296: | 52 | 6 | 52 | 52 | - | 51 | 5 | 51 | 51 | 745.26329 | -0.50 | 0.0435  |
| 2297: | 56 | 6 | 56 | 56 | - | 55 | 5 | 55 | 55 | 746.95472 | -0.50 | -0.4165 |
| 2298: | 57 | 6 | 57 | 57 | - | 56 | 5 | 56 | 56 | 747.36983 | -0.50 | -0.2244 |
| 2299: | 58 | 6 | 58 | 58 | - | 57 | 5 | 57 | 57 | 747.78165 | -0.50 | -0.0901 |
| 2300: | 59 | 6 | 59 | 59 | - | 58 | 5 | 58 | 58 | 748.19051 | -0.50 | 0.3214  |
| 2301: | 60 | 6 | 60 | 60 | - | 59 | 5 | 59 | 59 | 748.59533 | -0.50 | -0.0646 |
| 2302: | 64 | 6 | 64 | 64 | - | 63 | 5 | 63 | 63 | 750.18337 | -0.50 | -0.3213 |
| 2303: | 65 | 6 | 65 | 65 | - | 64 | 5 | 64 | 64 | 750.57270 | -0.50 | 0.0922  |
| 2304: | 68 | 6 | 68 | 68 | - | 67 | 5 | 67 | 67 | 751.71922 | -0.50 | -0.4757 |
| 2305: | 70 | 6 | 70 | 70 | - | 69 | 5 | 69 | 69 | 752.46798 | -0.50 | -0.0043 |
| 2306: | 71 | 6 | 71 | 71 | - | 70 | 5 | 70 | 70 | 752.83725 | -0.50 | 0.0680  |
| 2307: | 72 | 6 | 72 | 72 | - | 71 | 5 | 71 | 71 | 753.20391 | -0.50 | 0.8350  |
| 2308: | 73 | 6 | 73 | 73 | - | 72 | 5 | 72 | 72 | 753.56633 | -0.50 | 0.6721  |
| 2309: | 75 | 6 | 75 | 75 | - | 74 | 5 | 74 | 74 | 754.28058 | -0.50 | -0.2930 |
| 2310: | 77 | 6 | 77 | 77 | - | 76 | 5 | 76 | 76 | 754.98373 | -0.50 | 0.9449  |
| 2311: | 78 | 6 | 78 | 78 | - | 77 | 5 | 77 | 77 | 755.32852 | -0.50 | -0.2195 |
| 2312: | 80 | 6 | 80 | 80 | - | 79 | 5 | 79 | 79 | 756.01282 | -1.50 | 2.2018  |
| 2313: | 82 | 6 | 82 | 82 | - | 81 | 5 | 81 | 81 | 756.68073 | -1.50 | 1.6415  |
| 2314: | 88 | 6 | 88 | 88 | - | 87 | 5 | 87 | 87 | 758.60356 | -1.50 | -0.0636 |
| 2315: | 68 | 7 | 68 | 68 | - | 69 | 6 | 69 | 69 | 666.35479 | -0.50 | 0.0222  |
| 2316: | 67 | 7 | 67 | 67 | - | 68 | 6 | 68 | 68 | 667.13301 | -1.00 | 0.7504  |
| 2317: | 66 | 7 | 66 | 66 | - | 67 | 6 | 67 | 67 | 667.90861 | -1.50 | 1.4943  |
| 2318: | 64 | 7 | 64 | 64 | - | 65 | 6 | 65 | 65 | 669.44964 | -0.50 | 0.7372  |
| 2319: | 63 | 7 | 63 | 63 | - | 64 | 6 | 64 | 64 | 670.21622 | -0.50 | 0.3950  |
| 2320: | 61 | 7 | 61 | 61 | - | 62 | 6 | 62 | 62 | 671.74223 | -0.50 | 0.5254  |
| 2321: | 60 | 7 | 60 | 60 | - | 61 | 6 | 61 | 61 | 672.50141 | -0.50 | 0.7569  |
| 2322: | 59 | 7 | 59 | 59 | - | 60 | 6 | 60 | 60 | 673.25662 | -0.50 | -0.3148 |
| 2323: | 58 | 7 | 58 | 58 | - | 59 | 6 | 59 | 59 | 674.00992 | -0.50 | -0.6253 |
| 2324: | 57 | 7 | 57 | 57 | - | 58 | 6 | 58 | 58 | 674.76109 | -0.50 | -0.3900 |
| 2325: | 56 | 7 | 56 | 56 | - | 57 | 6 | 57 | 57 | 675.50989 | -0.50 | 0.1555  |

|       |    |   |    |    |   |    |   |    |    |           |       |         |
|-------|----|---|----|----|---|----|---|----|----|-----------|-------|---------|
| 2326: | 55 | 7 | 55 | 55 | - | 56 | 6 | 56 | 56 | 676.25552 | -0.50 | 0.2157  |
| 2327: | 53 | 7 | 53 | 53 | - | 54 | 6 | 54 | 54 | 677.73836 | -0.50 | -0.0120 |
| 2328: | 52 | 7 | 52 | 52 | - | 53 | 6 | 53 | 53 | 678.47564 | -0.50 | -0.2208 |
| 2329: | 51 | 7 | 51 | 51 | - | 52 | 6 | 52 | 52 | 679.21192 | -1.00 | 1.2730  |
| 2330: | 50 | 7 | 50 | 50 | - | 51 | 6 | 51 | 51 | 679.94237 | -0.50 | -0.3561 |
| 2331: | 49 | 7 | 49 | 49 | - | 50 | 6 | 50 | 50 | 680.67243 | -0.50 | 0.3366  |
| 2332: | 48 | 7 | 48 | 48 | - | 49 | 6 | 49 | 49 | 681.39876 | -0.50 | 0.0154  |
| 2333: | 47 | 7 | 47 | 47 | - | 48 | 6 | 48 | 48 | 682.12302 | -0.50 | 0.3450  |
| 2334: | 45 | 7 | 45 | 45 | - | 46 | 6 | 46 | 46 | 683.56239 | -0.50 | 0.0344  |
| 2335: | 44 | 7 | 44 | 44 | - | 45 | 6 | 45 | 45 | 684.27838 | -0.50 | 0.2834  |
| 2336: | 43 | 7 | 43 | 43 | - | 44 | 6 | 44 | 44 | 684.99149 | -0.50 | 0.3913  |
| 2337: | 42 | 7 | 42 | 42 | - | 43 | 6 | 43 | 43 | 685.70237 | -1.00 | 1.0126  |
| 2338: | 41 | 7 | 41 | 41 | - | 42 | 6 | 42 | 42 | 686.40923 | -0.60 | 0.3619  |
| 2339: | 40 | 7 | 40 | 40 | - | 41 | 6 | 41 | 41 | 687.11412 | -0.60 | 0.4939  |
| 2340: | 39 | 7 | 39 | 39 | - | 40 | 6 | 40 | 40 | 687.81588 | -0.60 | 0.2529  |
| 2341: | 38 | 7 | 38 | 38 | - | 39 | 6 | 39 | 39 | 688.51481 | -0.60 | -0.0562 |
| 2342: | 37 | 7 | 37 | 37 | - | 38 | 6 | 38 | 38 | 689.21086 | -0.60 | -0.4791 |
| 2343: | 36 | 7 | 36 | 36 | - | 37 | 6 | 37 | 37 | 689.90439 | -0.60 | -0.6510 |
| 2344: | 35 | 7 | 35 | 35 | - | 36 | 6 | 36 | 36 | 690.59596 | -0.60 | -0.0074 |
| 2345: | 34 | 7 | 34 | 34 | - | 35 | 6 | 35 | 35 | 691.28368 | -0.60 | -0.4337 |
| 2346: | 33 | 7 | 33 | 33 | - | 34 | 6 | 34 | 34 | 691.97012 | -0.60 | 0.6447  |
| 2347: | 28 | 7 | 28 | 28 | - | 29 | 6 | 29 | 29 | 695.35402 | -0.50 | -0.3303 |
| 2348: | 27 | 7 | 27 | 27 | - | 28 | 6 | 28 | 28 | 696.02195 | -0.50 | -0.9563 |
| 2349: | 25 | 7 | 25 | 25 | - | 26 | 6 | 26 | 26 | 697.35121 | -0.50 | -0.3522 |
| 2350: | 23 | 7 | 23 | 23 | - | 24 | 6 | 24 | 24 | 698.66879 | -0.50 | -0.1221 |
| 2351: | 17 | 7 | 17 | 17 | - | 18 | 6 | 18 | 18 | 702.55303 | -0.50 | 0.2778  |
| 2352: | 15 | 7 | 15 | 15 | - | 16 | 6 | 16 | 16 | 703.82473 | -0.50 | 0.2262  |
| 2353: | 13 | 7 | 13 | 13 | - | 14 | 6 | 14 | 14 | 705.08497 | -0.50 | 0.2083  |
| 2354: | 10 | 7 | 10 | 10 | - | 9  | 6 | 9  | 9  | 719.29769 | -0.50 | 0.1975  |
| 2355: | 19 | 7 | 19 | 19 | - | 18 | 6 | 18 | 18 | 724.18472 | -0.50 | -0.9128 |
| 2356: | 21 | 7 | 21 | 21 | - | 20 | 6 | 20 | 20 | 725.23835 | -0.50 | -0.1984 |
| 2357: | 25 | 7 | 25 | 25 | - | 24 | 6 | 24 | 24 | 727.30764 | -0.50 | -0.0759 |
| 2358: | 26 | 7 | 26 | 26 | - | 25 | 6 | 25 | 25 | 727.81715 | -0.50 | -0.1906 |
| 2359: | 27 | 7 | 27 | 27 | - | 26 | 6 | 26 | 26 | 728.32388 | -0.50 | -0.0086 |
| 2360: | 28 | 7 | 28 | 28 | - | 27 | 6 | 27 | 27 | 728.82726 | -0.50 | -0.0949 |
| 2361: | 30 | 7 | 30 | 30 | - | 29 | 6 | 29 | 29 | 729.82459 | -0.50 | -0.4324 |
| 2362: | 32 | 7 | 32 | 32 | - | 31 | 6 | 31 | 31 | 730.81014 | -0.50 | -0.1633 |
| 2363: | 33 | 7 | 33 | 33 | - | 32 | 6 | 32 | 32 | 731.29705 | -1.50 | -1.2363 |
| 2364: | 34 | 7 | 34 | 34 | - | 33 | 6 | 33 | 33 | 731.78338 | -0.50 | 0.2223  |
| 2365: | 35 | 7 | 35 | 35 | - | 34 | 6 | 34 | 34 | 732.26567 | -0.50 | 0.7576  |
| 2366: | 36 | 7 | 36 | 36 | - | 35 | 6 | 35 | 35 | 732.74317 | -0.50 | -0.3754 |
| 2367: | 37 | 7 | 37 | 37 | - | 36 | 6 | 36 | 36 | 733.22003 | -1.00 | 0.9783  |
| 2368: | 38 | 7 | 38 | 38 | - | 37 | 6 | 37 | 37 | 733.69122 | -0.50 | -0.2064 |
| 2369: | 39 | 7 | 39 | 39 | - | 38 | 6 | 38 | 38 | 734.16072 | -0.50 | 0.0557  |
| 2370: | 40 | 7 | 40 | 40 | - | 39 | 6 | 39 | 39 | 734.62582 | -0.50 | -0.9404 |
| 2371: | 43 | 7 | 43 | 43 | - | 42 | 6 | 42 | 42 | 736.00547 | -0.50 | -0.6776 |
| 2372: | 44 | 7 | 44 | 44 | - | 43 | 6 | 43 | 43 | 736.45918 | -0.50 | -0.4461 |
| 2373: | 45 | 7 | 45 | 45 | - | 44 | 6 | 44 | 44 | 736.90932 | -0.50 | -0.6176 |
| 2374: | 46 | 7 | 46 | 46 | - | 45 | 6 | 45 | 45 | 737.35721 | -0.50 | 0.1331  |
| 2375: | 52 | 7 | 52 | 52 | - | 51 | 6 | 51 | 51 | 739.97411 | -0.50 | 1.0973  |
| 2376: | 53 | 7 | 53 | 53 | - | 52 | 6 | 52 | 52 | 740.39725 | -0.50 | -0.5544 |
| 2377: | 55 | 7 | 55 | 55 | - | 54 | 6 | 54 | 54 | 741.23756 | -0.50 | -0.1837 |
| 2378: | 57 | 7 | 57 | 57 | - | 56 | 6 | 56 | 56 | 742.06430 | -0.50 | -0.4900 |
| 2379: | 58 | 7 | 58 | 58 | - | 57 | 6 | 57 | 57 | 742.47345 | -0.50 | -0.0154 |

(29)Si(32)S

|       |    |    |    |    |   |    |    |    |    |           |       |         |
|-------|----|----|----|----|---|----|----|----|----|-----------|-------|---------|
| 2380: | 96 | 61 | 96 | 96 | - | 97 | 60 | 97 | 97 | 667.32363 | -0.50 | 0.2695  |
| 2381: | 90 | 61 | 90 | 90 | - | 91 | 60 | 91 | 91 | 672.37880 | -0.50 | -0.4895 |
| 2382: | 89 | 61 | 89 | 89 | - | 90 | 60 | 90 | 90 | 673.21369 | -0.50 | 0.3509  |
| 2383: | 87 | 61 | 87 | 87 | - | 88 | 60 | 88 | 88 | 674.87512 | -1.50 | 1.0949  |
| 2384: | 86 | 61 | 86 | 86 | - | 87 | 60 | 87 | 87 | 675.70057 | -0.50 | -0.0831 |
| 2385: | 85 | 61 | 85 | 85 | - | 86 | 60 | 86 | 86 | 676.52426 | -0.50 | -0.5388 |
| 2386: | 84 | 61 | 84 | 84 | - | 85 | 60 | 85 | 85 | 677.34661 | -0.50 | 0.1518  |
| 2387: | 83 | 61 | 83 | 83 | - | 84 | 60 | 84 | 84 | 678.16590 | -0.50 | 0.2731  |
| 2388: | 82 | 61 | 82 | 82 | - | 83 | 60 | 83 | 83 | 678.98391 | -1.50 | 1.6092  |
| 2389: | 81 | 61 | 81 | 81 | - | 82 | 60 | 82 | 82 | 679.79658 | -0.50 | 0.1043  |
| 2390: | 80 | 61 | 80 | 80 | - | 81 | 60 | 81 | 81 | 680.60888 | -0.50 | 0.7326  |
| 2391: | 78 | 61 | 78 | 78 | - | 79 | 60 | 79 | 79 | 682.22443 | -0.50 | 0.4657  |
| 2392: | 77 | 61 | 77 | 77 | - | 78 | 60 | 78 | 78 | 683.02715 | -1.00 | -0.9510 |
| 2393: | 76 | 61 | 76 | 76 | - | 77 | 60 | 77 | 77 | 683.82954 | -0.50 | -0.1776 |
| 2394: | 74 | 61 | 74 | 74 | - | 75 | 60 | 75 | 75 | 685.42551 | -0.50 | 0.1365  |

|       |    |    |    |    |   |    |    |    |    |           |       |         |
|-------|----|----|----|----|---|----|----|----|----|-----------|-------|---------|
| 2395: | 73 | 61 | 73 | 73 | - | 74 | 60 | 74 | 74 | 686.21902 | -0.50 | -0.3843 |
| 2396: | 72 | 61 | 72 | 72 | - | 73 | 60 | 73 | 73 | 687.01127 | -0.50 | 0.3720  |
| 2397: | 71 | 61 | 71 | 71 | - | 72 | 60 | 72 | 72 | 687.79998 | -0.50 | 0.1296  |
| 2398: | 70 | 61 | 70 | 70 | - | 71 | 60 | 71 | 71 | 688.58653 | -0.50 | 0.2729  |
| 2399: | 69 | 61 | 69 | 69 | - | 70 | 60 | 70 | 70 | 689.37020 | -0.50 | 0.0861  |
| 2400: | 68 | 61 | 68 | 68 | - | 69 | 60 | 69 | 69 | 690.15107 | -0.50 | -0.3466 |
| 2401: | 67 | 61 | 67 | 67 | - | 68 | 60 | 68 | 68 | 690.93022 | -0.50 | 0.0592  |
| 2402: | 66 | 61 | 66 | 66 | - | 67 | 60 | 67 | 67 | 691.70659 | -0.50 | 0.2477  |
| 2403: | 65 | 61 | 65 | 65 | - | 66 | 60 | 66 | 66 | 692.47811 | -1.50 | -1.8468 |
| 2404: | 64 | 61 | 64 | 64 | - | 65 | 60 | 65 | 65 | 693.25100 | -0.50 | 0.0001  |
| 2405: | 63 | 61 | 63 | 63 | - | 64 | 60 | 64 | 64 | 694.01901 | -0.50 | -0.4574 |
| 2406: | 62 | 61 | 62 | 62 | - | 63 | 60 | 63 | 63 | 694.78548 | -0.50 | 0.1251  |
| 2407: | 61 | 61 | 61 | 61 | - | 62 | 60 | 62 | 62 | 695.54941 | -0.50 | 0.7517  |
| 2408: | 60 | 61 | 60 | 60 | - | 61 | 60 | 61 | 61 | 696.31069 | -1.50 | 1.3170  |
| 2409: | 59 | 61 | 59 | 59 | - | 60 | 60 | 60 | 60 | 697.06558 | -1.50 | -1.9148 |
| 2410: | 58 | 61 | 58 | 58 | - | 59 | 60 | 59 | 59 | 697.82311 | -0.50 | 0.0905  |
| 2411: | 56 | 61 | 56 | 56 | - | 57 | 60 | 57 | 57 | 699.32566 | -0.50 | -0.5998 |
| 2412: | 55 | 61 | 55 | 55 | - | 56 | 60 | 56 | 56 | 700.07414 | -0.50 | 0.1733  |
| 2413: | 53 | 61 | 53 | 53 | - | 54 | 60 | 54 | 54 | 701.56098 | -0.50 | -0.5525 |
| 2414: | 52 | 61 | 52 | 52 | - | 53 | 60 | 53 | 53 | 702.30036 | -1.50 | -1.0227 |
| 2415: | 51 | 61 | 51 | 51 | - | 52 | 60 | 52 | 52 | 703.03849 | -0.50 | -0.1151 |
| 2416: | 50 | 61 | 50 | 50 | - | 51 | 60 | 51 | 51 | 703.77325 | -0.50 | 0.0544  |
| 2417: | 49 | 61 | 49 | 49 | - | 50 | 60 | 50 | 50 | 704.50536 | -0.50 | 0.2103  |
| 2418: | 48 | 61 | 48 | 48 | - | 49 | 60 | 49 | 49 | 705.23453 | -0.50 | 0.0671  |
| 2419: | 47 | 61 | 47 | 47 | - | 48 | 60 | 48 | 48 | 705.96127 | -0.50 | 0.1389  |
| 2420: | 46 | 61 | 46 | 46 | - | 47 | 60 | 47 | 47 | 706.68538 | -0.50 | 0.2304  |
| 2421: | 45 | 61 | 45 | 45 | - | 46 | 60 | 46 | 46 | 707.40607 | -0.50 | -0.4443 |
| 2422: | 44 | 61 | 44 | 44 | - | 45 | 60 | 45 | 45 | 708.12409 | -1.50 | -1.1306 |
| 2423: | 43 | 61 | 43 | 43 | - | 44 | 60 | 44 | 44 | 708.84118 | -0.50 | -0.0841 |
| 2424: | 42 | 61 | 42 | 42 | - | 43 | 60 | 43 | 43 | 709.55333 | -1.50 | -1.3105 |
| 2425: | 41 | 61 | 41 | 41 | - | 42 | 60 | 42 | 42 | 710.26592 | -0.50 | 0.5747  |
| 2426: | 40 | 61 | 40 | 40 | - | 41 | 60 | 41 | 41 | 710.97332 | -0.50 | -0.0542 |
| 2427: | 39 | 61 | 39 | 39 | - | 40 | 60 | 40 | 40 | 711.67929 | -0.50 | 0.5673  |
| 2428: | 38 | 61 | 38 | 38 | - | 39 | 60 | 39 | 39 | 712.38009 | -1.50 | -1.2963 |
| 2429: | 37 | 61 | 37 | 37 | - | 38 | 60 | 38 | 38 | 713.08258 | -1.50 | 1.2193  |
| 2430: | 36 | 61 | 36 | 36 | - | 37 | 60 | 37 | 37 | 713.77964 | -1.00 | 0.9986  |
| 2431: | 35 | 61 | 35 | 35 | - | 36 | 60 | 36 | 36 | 714.47230 | -1.00 | -0.9240 |
| 2432: | 34 | 61 | 34 | 34 | - | 35 | 60 | 35 | 35 | 715.16673 | -2.00 | 1.6261  |
| 2433: | 32 | 61 | 32 | 32 | - | 33 | 60 | 33 | 33 | 716.53890 | -1.50 | -1.8384 |
| 2434: | 31 | 61 | 31 | 31 | - | 32 | 60 | 32 | 32 | 717.22676 | -2.00 | 2.2760  |
| 2435: | 28 | 61 | 28 | 28 | - | 29 | 60 | 29 | 29 | 719.25926 | -0.50 | -0.1204 |
| 2436: | 27 | 61 | 27 | 27 | - | 28 | 60 | 28 | 28 | 719.93207 | -0.50 | -0.1475 |
| 2437: | 26 | 61 | 26 | 26 | - | 27 | 60 | 27 | 27 | 720.60235 | -0.50 | 0.0337  |
| 2438: | 25 | 61 | 25 | 25 | - | 26 | 60 | 26 | 26 | 721.26984 | -0.50 | 0.1676  |
| 2439: | 24 | 61 | 24 | 24 | - | 25 | 60 | 25 | 25 | 721.93421 | -0.50 | -0.0712 |
| 2440: | 23 | 61 | 23 | 23 | - | 24 | 60 | 24 | 24 | 722.59801 | -1.50 | 1.8718  |
| 2441: | 22 | 61 | 22 | 22 | - | 23 | 60 | 23 | 23 | 723.25666 | -1.50 | 1.4210  |
| 2442: | 21 | 61 | 21 | 21 | - | 22 | 60 | 22 | 22 | 723.91169 | -0.50 | 0.1111  |
| 2443: | 20 | 61 | 20 | 20 | - | 21 | 60 | 21 | 21 | 724.56517 | -0.50 | 0.0164  |
| 2444: | 19 | 61 | 19 | 19 | - | 20 | 60 | 20 | 20 | 725.21594 | -0.50 | -0.0186 |
| 2445: | 18 | 61 | 18 | 18 | - | 19 | 60 | 19 | 19 | 725.86452 | -0.50 | 0.5308  |
| 2446: | 17 | 61 | 17 | 17 | - | 18 | 60 | 18 | 18 | 726.50919 | -0.50 | -0.0509 |
| 2447: | 16 | 61 | 16 | 16 | - | 17 | 60 | 17 | 17 | 727.15071 | -1.00 | -0.9994 |
| 2448: | 14 | 61 | 14 | 14 | - | 15 | 60 | 15 | 15 | 728.42815 | -0.50 | -0.1280 |
| 2449: | 12 | 61 | 12 | 12 | - | 13 | 60 | 13 | 13 | 729.69365 | -0.50 | -0.0088 |
| 2450: | 10 | 61 | 10 | 10 | - | 11 | 60 | 11 | 11 | 730.94736 | -0.50 | -0.4555 |
| 2451: | 6  | 61 | 6  | 6  | - | 7  | 60 | 7  | 7  | 733.42182 | -0.50 | -0.4902 |
| 2452: | 8  | 61 | 8  | 8  | - | 7  | 60 | 7  | 7  | 742.29544 | -0.50 | -0.0615 |
| 2453: | 13 | 61 | 13 | 13 | - | 12 | 60 | 12 | 12 | 745.10824 | -0.50 | -0.6336 |
| 2454: | 14 | 61 | 14 | 14 | - | 13 | 60 | 13 | 13 | 745.66315 | -0.50 | 0.3609  |
| 2455: | 16 | 61 | 16 | 16 | - | 15 | 60 | 15 | 15 | 746.76108 | -0.50 | -0.7440 |
| 2456: | 17 | 61 | 17 | 17 | - | 16 | 60 | 16 | 16 | 747.30696 | -0.50 | 0.0260  |
| 2457: | 18 | 61 | 18 | 18 | - | 17 | 60 | 17 | 17 | 747.84977 | -0.50 | 0.6706  |
| 2458: | 20 | 61 | 20 | 20 | - | 19 | 60 | 19 | 19 | 748.92416 | -0.50 | -0.4180 |
| 2459: | 22 | 61 | 22 | 22 | - | 21 | 60 | 21 | 21 | 749.98831 | -0.50 | 0.0878  |
| 2460: | 23 | 61 | 23 | 23 | - | 22 | 60 | 22 | 22 | 750.51479 | -1.00 | -0.8046 |
| 2461: | 24 | 61 | 24 | 24 | - | 23 | 60 | 23 | 23 | 751.04029 | -0.50 | 0.2957  |
| 2462: | 25 | 61 | 25 | 25 | - | 24 | 60 | 24 | 24 | 751.56147 | -0.50 | 0.0534  |
| 2463: | 26 | 61 | 26 | 26 | - | 25 | 60 | 25 | 25 | 752.07933 | -0.50 | -0.5267 |
| 2464: | 27 | 61 | 27 | 27 | - | 26 | 60 | 26 | 26 | 752.59488 | -0.50 | -0.4300 |
| 2465: | 28 | 61 | 28 | 28 | - | 27 | 60 | 27 | 27 | 753.10761 | -0.50 | -0.1618 |

|       |    |    |    |    |   |    |    |    |    |           |       |         |
|-------|----|----|----|----|---|----|----|----|----|-----------|-------|---------|
| 2466: | 29 | 61 | 29 | 29 | - | 28 | 60 | 28 | 28 | 753.61739 | -0.50 | 0.1528  |
| 2467: | 30 | 61 | 30 | 30 | - | 29 | 60 | 29 | 29 | 754.12371 | -0.50 | 0.0085  |
| 2468: | 31 | 61 | 31 | 31 | - | 30 | 60 | 30 | 30 | 754.62756 | -0.50 | 0.3999  |
| 2469: | 33 | 61 | 33 | 33 | - | 32 | 60 | 32 | 32 | 755.62496 | -0.50 | -0.0809 |
| 2470: | 34 | 61 | 34 | 34 | - | 33 | 60 | 33 | 33 | 756.11990 | -0.50 | 0.4464  |
| 2471: | 35 | 61 | 35 | 35 | - | 34 | 60 | 34 | 34 | 756.61104 | -0.50 | 0.1985  |
| 2472: | 36 | 61 | 36 | 36 | - | 35 | 60 | 35 | 35 | 757.10094 | -1.50 | 1.7401  |
| 2473: | 39 | 61 | 39 | 39 | - | 38 | 60 | 38 | 38 | 758.54613 | -0.50 | 0.0799  |
| 2474: | 40 | 61 | 40 | 40 | - | 39 | 60 | 39 | 39 | 759.02234 | -0.50 | 0.0974  |
| 2475: | 42 | 61 | 42 | 42 | - | 41 | 60 | 41 | 41 | 759.96623 | -1.00 | 0.7676  |
| 2476: | 43 | 61 | 43 | 43 | - | 42 | 60 | 42 | 42 | 760.43261 | -0.50 | 0.1298  |
| 2477: | 44 | 61 | 44 | 44 | - | 43 | 60 | 43 | 43 | 760.89606 | -0.50 | -0.3702 |
| 2478: | 45 | 61 | 45 | 45 | - | 44 | 60 | 44 | 44 | 761.35735 | -0.50 | 0.0424  |
| 2479: | 46 | 61 | 46 | 46 | - | 45 | 60 | 45 | 45 | 761.81422 | -0.50 | -0.8875 |
| 2480: | 48 | 61 | 48 | 48 | - | 47 | 60 | 47 | 47 | 762.72320 | -2.00 | 1.7442  |
| 2481: | 49 | 61 | 49 | 49 | - | 48 | 60 | 48 | 48 | 763.17113 | -2.00 | 1.1355  |
| 2482: | 50 | 61 | 50 | 50 | - | 49 | 60 | 49 | 49 | 763.61551 | -0.50 | 0.0735  |
| 2483: | 51 | 61 | 51 | 51 | - | 50 | 60 | 50 | 50 | 764.05761 | -0.50 | -0.1669 |
| 2484: | 52 | 61 | 52 | 52 | - | 51 | 60 | 51 | 51 | 764.49686 | -0.50 | -0.1510 |
| 2485: | 53 | 61 | 53 | 53 | - | 52 | 60 | 52 | 52 | 764.93326 | -0.50 | 0.1262  |
| 2486: | 57 | 61 | 57 | 57 | - | 56 | 60 | 56 | 56 | 766.64648 | -0.50 | 0.0645  |
| 2487: | 58 | 61 | 58 | 58 | - | 57 | 60 | 57 | 57 | 767.06551 | -2.00 | -1.3993 |
| 2488: | 59 | 61 | 59 | 59 | - | 58 | 60 | 58 | 58 | 767.48463 | -0.50 | 0.3674  |
| 2489: | 60 | 61 | 60 | 60 | - | 59 | 60 | 59 | 59 | 767.89819 | -0.50 | -0.2807 |
| 2490: | 61 | 61 | 61 | 61 | - | 60 | 60 | 60 | 60 | 768.30974 | -0.50 | 0.2114  |
| 2491: | 62 | 61 | 62 | 62 | - | 61 | 60 | 61 | 61 | 768.71746 | -0.50 | 0.0286  |
| 2492: | 63 | 61 | 63 | 63 | - | 62 | 60 | 62 | 62 | 769.12243 | -0.50 | 0.2558  |
| 2493: | 65 | 61 | 65 | 65 | - | 64 | 60 | 64 | 64 | 769.92091 | -1.50 | -1.2504 |
| 2494: | 66 | 61 | 66 | 66 | - | 65 | 60 | 65 | 65 | 770.31780 | -0.50 | 0.4061  |
| 2495: | 68 | 61 | 68 | 68 | - | 67 | 60 | 67 | 67 | 771.09697 | -1.50 | -1.3472 |
| 2496: | 70 | 61 | 70 | 70 | - | 69 | 60 | 69 | 69 | 771.86603 | -0.50 | -0.4527 |
| 2497: | 72 | 61 | 72 | 72 | - | 71 | 60 | 71 | 71 | 772.62163 | -0.50 | -0.2209 |
| 2498: | 73 | 61 | 73 | 73 | - | 72 | 60 | 72 | 72 | 772.99498 | -0.50 | 0.2563  |
| 2499: | 74 | 61 | 74 | 74 | - | 73 | 60 | 73 | 73 | 773.36483 | -0.50 | 0.4478  |
| 2500: | 75 | 61 | 75 | 75 | - | 74 | 60 | 74 | 74 | 773.73120 | -0.50 | 0.3783  |
| 2501: | 76 | 61 | 76 | 76 | - | 75 | 60 | 75 | 75 | 774.09465 | -0.50 | 0.6130  |
| 2502: | 89 | 62 | 89 | 89 | - | 90 | 61 | 90 | 90 | 668.40252 | -1.50 | 0.5912  |
| 2503: | 87 | 62 | 87 | 87 | - | 88 | 61 | 88 | 88 | 670.05692 | -0.50 | -0.0123 |
| 2504: | 86 | 62 | 86 | 86 | - | 87 | 61 | 87 | 87 | 670.88090 | -0.50 | 0.1816  |
| 2505: | 85 | 62 | 85 | 85 | - | 86 | 61 | 86 | 86 | 671.70135 | -0.50 | -0.6717 |
| 2506: | 84 | 62 | 84 | 84 | - | 85 | 61 | 85 | 85 | 672.52139 | -1.50 | 0.5518  |
| 2507: | 83 | 62 | 83 | 83 | - | 84 | 61 | 84 | 84 | 673.33891 | -2.50 | 1.7464  |
| 2508: | 82 | 62 | 82 | 82 | - | 83 | 61 | 83 | 83 | 674.15100 | -0.50 | 0.0062  |
| 2509: | 81 | 62 | 81 | 81 | - | 82 | 61 | 82 | 82 | 674.96158 | -0.50 | -0.7445 |
| 2510: | 80 | 62 | 80 | 80 | - | 81 | 61 | 81 | 81 | 675.77160 | -0.50 | 0.4485  |
| 2511: | 79 | 62 | 79 | 79 | - | 80 | 61 | 80 | 80 | 676.57773 | -0.50 | 0.2593  |
| 2512: | 75 | 62 | 75 | 75 | - | 76 | 61 | 76 | 76 | 679.77754 | -0.50 | -0.0447 |
| 2513: | 74 | 62 | 74 | 74 | - | 75 | 61 | 75 | 75 | 680.57034 | -1.50 | -0.9613 |
| 2514: | 72 | 62 | 72 | 72 | - | 73 | 61 | 73 | 73 | 682.14920 | -2.00 | -1.9306 |
| 2515: | 71 | 62 | 71 | 71 | - | 72 | 61 | 72 | 72 | 682.93809 | -1.00 | 0.8552  |
| 2516: | 69 | 62 | 69 | 69 | - | 70 | 61 | 70 | 70 | 684.50181 | -0.50 | 0.0090  |
| 2517: | 68 | 62 | 68 | 68 | - | 69 | 61 | 69 | 69 | 685.27995 | -0.50 | -0.3045 |
| 2518: | 67 | 62 | 67 | 67 | - | 68 | 61 | 68 | 68 | 686.05659 | -0.50 | 0.4408  |
| 2519: | 66 | 62 | 66 | 66 | - | 67 | 61 | 67 | 67 | 686.82921 | -0.50 | -0.2708 |
| 2520: | 65 | 62 | 65 | 65 | - | 66 | 61 | 66 | 66 | 687.60003 | -0.50 | -0.2151 |
| 2521: | 64 | 62 | 64 | 64 | - | 65 | 61 | 65 | 65 | 688.36780 | -0.50 | -0.6377 |
| 2522: | 63 | 62 | 63 | 63 | - | 64 | 61 | 64 | 64 | 689.13415 | -0.50 | 0.0956  |
| 2523: | 62 | 62 | 62 | 62 | - | 63 | 61 | 63 | 63 | 689.89612 | -1.50 | -0.9709 |
| 2524: | 59 | 62 | 59 | 59 | - | 60 | 61 | 60 | 60 | 692.17068 | -0.50 | 0.0043  |
| 2525: | 58 | 62 | 58 | 58 | - | 59 | 61 | 59 | 59 | 692.92356 | -0.50 | 0.2120  |
| 2526: | 55 | 62 | 55 | 55 | - | 56 | 61 | 56 | 56 | 695.16569 | -0.50 | -0.0468 |
| 2527: | 54 | 62 | 54 | 54 | - | 55 | 61 | 55 | 55 | 695.90819 | -0.50 | 0.2142  |
| 2528: | 53 | 62 | 53 | 53 | - | 54 | 61 | 54 | 54 | 696.64940 | -2.00 | 1.8044  |
| 2529: | 52 | 62 | 52 | 52 | - | 53 | 61 | 53 | 53 | 697.38555 | -1.00 | 0.9582  |
| 2530: | 51 | 62 | 51 | 51 | - | 52 | 61 | 52 | 52 | 698.11981 | -0.50 | 0.8499  |
| 2531: | 50 | 62 | 50 | 50 | - | 51 | 61 | 51 | 51 | 698.85077 | -0.50 | 0.0738  |
| 2532: | 49 | 62 | 49 | 49 | - | 50 | 61 | 50 | 50 | 699.57985 | -0.50 | 0.0544  |
| 2533: | 48 | 62 | 48 | 48 | - | 49 | 61 | 49 | 49 | 700.30616 | -0.50 | -0.0940 |
| 2534: | 47 | 62 | 47 | 47 | - | 48 | 61 | 48 | 48 | 701.03016 | -0.50 | 0.0930  |
| 2535: | 45 | 62 | 45 | 45 | - | 46 | 61 | 46 | 46 | 702.47098 | -1.50 | 1.2407  |
| 2536: | 44 | 62 | 44 | 44 | - | 45 | 61 | 45 | 45 | 703.18704 | -1.50 | 1.4503  |

|       |    |    |    |    |   |    |    |    |    |           |       |         |
|-------|----|----|----|----|---|----|----|----|----|-----------|-------|---------|
| 2537: | 43 | 62 | 43 | 43 | - | 44 | 61 | 44 | 44 | 703.89836 | -0.50 | -0.4172 |
| 2538: | 42 | 62 | 42 | 42 | - | 43 | 61 | 43 | 43 | 704.60984 | -0.50 | 0.5426  |
| 2539: | 41 | 62 | 41 | 41 | - | 42 | 61 | 42 | 42 | 705.31725 | -0.50 | 0.1043  |
| 2540: | 40 | 62 | 40 | 40 | - | 41 | 61 | 41 | 41 | 706.02221 | -0.50 | -0.1079 |
| 2541: | 39 | 62 | 39 | 39 | - | 40 | 61 | 40 | 40 | 706.72478 | -0.50 | -0.0294 |
| 2542: | 38 | 62 | 38 | 38 | - | 39 | 61 | 39 | 39 | 707.42421 | -0.50 | -0.4059 |
| 2543: | 36 | 62 | 36 | 36 | - | 37 | 61 | 37 | 37 | 708.81544 | -1.00 | -0.7160 |
| 2544: | 35 | 62 | 35 | 35 | - | 36 | 61 | 36 | 36 | 709.50774 | -0.50 | -0.1408 |
| 2545: | 34 | 62 | 34 | 34 | - | 35 | 61 | 35 | 35 | 710.19751 | -0.50 | 0.6072  |
| 2546: | 33 | 62 | 33 | 33 | - | 34 | 61 | 34 | 34 | 710.88279 | -0.50 | -0.4276 |
| 2547: | 30 | 62 | 30 | 30 | - | 31 | 61 | 31 | 31 | 712.92545 | -0.50 | -0.4240 |
| 2548: | 29 | 62 | 29 | 29 | - | 30 | 61 | 30 | 30 | 713.60161 | -0.50 | 0.2947  |
| 2549: | 28 | 62 | 28 | 28 | - | 29 | 61 | 29 | 29 | 714.27519 | -1.50 | 1.1630  |
| 2550: | 27 | 62 | 27 | 27 | - | 28 | 61 | 28 | 28 | 714.94191 | -1.50 | -2.0948 |
| 2551: | 26 | 62 | 26 | 26 | - | 27 | 61 | 27 | 27 | 715.61203 | -1.00 | 0.7860  |
| 2552: | 23 | 62 | 23 | 23 | - | 24 | 61 | 24 | 24 | 717.59588 | -0.50 | -0.6058 |
| 2553: | 22 | 62 | 22 | 22 | - | 23 | 61 | 23 | 23 | 718.25346 | -1.00 | 0.7339  |
| 2554: | 20 | 62 | 20 | 20 | - | 21 | 61 | 21 | 21 | 719.55765 | -1.00 | 0.7306  |
| 2555: | 19 | 62 | 19 | 19 | - | 20 | 61 | 20 | 20 | 720.20469 | -0.50 | -0.1732 |
| 2556: | 16 | 62 | 16 | 16 | - | 17 | 61 | 17 | 17 | 722.13158 | -0.50 | -0.4497 |
| 2557: | 15 | 62 | 15 | 15 | - | 16 | 61 | 16 | 16 | 722.76924 | -0.50 | 0.3916  |
| 2558: | 14 | 62 | 14 | 14 | - | 15 | 61 | 15 | 15 | 723.40274 | -0.50 | -0.1344 |
| 2559: | 12 | 62 | 12 | 12 | - | 13 | 61 | 13 | 13 | 724.66239 | -0.50 | -0.1404 |
| 2560: | 11 | 62 | 11 | 11 | - | 12 | 61 | 12 | 12 | 725.28882 | -0.50 | 0.6687  |
| 2561: | 10 | 62 | 10 | 10 | - | 11 | 61 | 11 | 11 | 725.91158 | -0.50 | 0.6186  |
| 2562: | 5  | 62 | 5  | 5  | - | 6  | 61 | 6  | 6  | 728.98306 | -0.50 | 0.3705  |
| 2563: | 10 | 62 | 10 | 10 | - | 9  | 61 | 9  | 9  | 738.33278 | -0.50 | 0.2223  |
| 2564: | 13 | 62 | 13 | 13 | - | 12 | 61 | 12 | 12 | 740.00308 | -0.50 | -0.1536 |
| 2565: | 15 | 62 | 15 | 15 | - | 14 | 61 | 14 | 14 | 741.10332 | -1.00 | 0.9257  |
| 2566: | 17 | 62 | 17 | 17 | - | 16 | 61 | 16 | 16 | 742.18975 | -0.50 | -0.0630 |
| 2567: | 18 | 62 | 18 | 18 | - | 17 | 61 | 17 | 17 | 742.72985 | -1.00 | 0.7427  |
| 2568: | 20 | 62 | 20 | 20 | - | 19 | 61 | 19 | 19 | 743.79793 | -1.00 | -0.9125 |
| 2569: | 21 | 62 | 21 | 21 | - | 20 | 61 | 20 | 20 | 744.32953 | -0.50 | 0.2560  |
| 2570: | 22 | 62 | 22 | 22 | - | 21 | 61 | 21 | 21 | 744.85727 | -0.50 | 0.5282  |
| 2571: | 23 | 62 | 23 | 23 | - | 22 | 61 | 22 | 22 | 745.38082 | -0.50 | -0.4211 |
| 2572: | 24 | 62 | 24 | 24 | - | 23 | 61 | 23 | 23 | 745.90329 | -0.50 | 0.5226  |
| 2573: | 29 | 62 | 29 | 29 | - | 28 | 61 | 28 | 28 | 748.46566 | -0.50 | 0.0235  |
| 2574: | 30 | 62 | 30 | 30 | - | 29 | 61 | 29 | 29 | 748.97043 | -1.50 | 1.2053  |
| 2575: | 31 | 62 | 31 | 31 | - | 30 | 61 | 30 | 30 | 749.46987 | -0.50 | 0.0633  |
| 2576: | 32 | 62 | 32 | 32 | - | 31 | 61 | 31 | 31 | 749.96679 | -0.50 | -0.5876 |
| 2577: | 33 | 62 | 33 | 33 | - | 32 | 61 | 32 | 32 | 750.46233 | -0.50 | 0.3972  |
| 2578: | 34 | 62 | 34 | 34 | - | 33 | 61 | 33 | 33 | 750.95485 | -1.50 | 1.3825  |
| 2579: | 35 | 62 | 35 | 35 | - | 34 | 61 | 34 | 34 | 751.44235 | -0.50 | 0.3732  |
| 2580: | 36 | 62 | 36 | 36 | - | 35 | 61 | 35 | 35 | 751.92773 | -0.50 | 0.2739  |
| 2581: | 37 | 62 | 37 | 37 | - | 36 | 61 | 36 | 36 | 752.40970 | -0.50 | -0.2005 |
| 2582: | 39 | 62 | 39 | 39 | - | 38 | 61 | 38 | 38 | 753.36667 | -1.00 | 1.0043  |
| 2583: | 40 | 62 | 40 | 40 | - | 39 | 61 | 39 | 39 | 753.83900 | -0.50 | 0.0232  |
| 2584: | 42 | 62 | 42 | 42 | - | 41 | 61 | 41 | 41 | 754.77637 | -0.50 | -0.0623 |
| 2585: | 43 | 62 | 43 | 43 | - | 42 | 61 | 42 | 42 | 755.24071 | -0.50 | 0.1430  |
| 2586: | 44 | 62 | 44 | 44 | - | 43 | 61 | 43 | 43 | 755.70132 | -0.50 | -0.3132 |
| 2587: | 49 | 62 | 49 | 49 | - | 48 | 61 | 48 | 48 | 757.96064 | -0.50 | -0.1292 |
| 2588: | 51 | 62 | 51 | 51 | - | 50 | 61 | 50 | 50 | 758.84192 | -1.00 | -0.8555 |
| 2589: | 53 | 62 | 53 | 53 | - | 52 | 61 | 52 | 52 | 759.71148 | -1.50 | -0.8734 |
| 2590: | 54 | 62 | 54 | 54 | - | 53 | 61 | 53 | 53 | 760.14259 | -0.50 | 0.1205  |
| 2591: | 55 | 62 | 55 | 55 | - | 54 | 61 | 54 | 54 | 760.57072 | -1.50 | 1.2561  |
| 2592: | 56 | 62 | 56 | 56 | - | 55 | 61 | 55 | 55 | 760.99548 | -1.50 | 2.1483  |
| 2593: | 57 | 62 | 57 | 57 | - | 56 | 61 | 56 | 56 | 761.41370 | -0.50 | -0.3681 |
| 2594: | 58 | 62 | 58 | 58 | - | 57 | 61 | 57 | 57 | 761.83171 | -0.50 | 0.0419  |
| 2595: | 59 | 62 | 59 | 59 | - | 58 | 61 | 58 | 58 | 762.24535 | -1.50 | -0.7769 |
| 2596: | 60 | 62 | 60 | 60 | - | 59 | 61 | 59 | 59 | 762.65735 | -0.50 | -0.0895 |
| 2597: | 61 | 62 | 61 | 61 | - | 60 | 61 | 60 | 60 | 763.06563 | -0.50 | 0.0288  |
| 2598: | 62 | 62 | 62 | 62 | - | 61 | 61 | 61 | 61 | 763.47144 | -0.50 | 0.8331  |
| 2599: | 63 | 62 | 63 | 63 | - | 62 | 61 | 62 | 62 | 763.87358 | -1.00 | 1.1283  |
| 2600: | 71 | 62 | 71 | 71 | - | 70 | 61 | 70 | 70 | 766.97202 | -1.50 | -0.8086 |
| 2601: | 73 | 62 | 73 | 73 | - | 72 | 61 | 72 | 72 | 767.71551 | -0.50 | -0.4589 |
| 2602: | 74 | 62 | 74 | 74 | - | 73 | 61 | 73 | 73 | 768.08374 | -1.00 | 1.0214  |
| 2603: | 67 | 63 | 67 | 67 | - | 68 | 62 | 68 | 68 | 681.18606 | -2.00 | -1.5931 |
| 2604: | 66 | 63 | 66 | 66 | - | 67 | 62 | 67 | 67 | 681.95790 | -0.50 | -0.2405 |
| 2605: | 65 | 63 | 65 | 65 | - | 66 | 62 | 66 | 66 | 682.72640 | -0.50 | 0.3399  |
| 2606: | 63 | 63 | 63 | 63 | - | 64 | 62 | 64 | 64 | 684.25338 | -1.00 | -0.7990 |
| 2607: | 62 | 63 | 62 | 62 | - | 63 | 62 | 63 | 63 | 685.01434 | -0.50 | -0.0296 |

|       |    |    |    |    |   |    |    |    |    |           |       |         |
|-------|----|----|----|----|---|----|----|----|----|-----------|-------|---------|
| 2608: | 61 | 63 | 61 | 61 | - | 62 | 62 | 62 | 62 | 685.77164 | -0.50 | -0.3353 |
| 2609: | 60 | 63 | 60 | 60 | - | 61 | 62 | 61 | 61 | 686.52703 | -0.50 | 0.0383  |
| 2610: | 59 | 63 | 59 | 59 | - | 60 | 62 | 60 | 60 | 687.27945 | -0.50 | 0.0354  |
| 2611: | 58 | 63 | 58 | 58 | - | 59 | 62 | 59 | 59 | 688.02877 | -0.50 | -0.4697 |
| 2612: | 57 | 63 | 57 | 57 | - | 58 | 62 | 58 | 58 | 688.77805 | -1.50 | 1.5875  |
| 2613: | 56 | 63 | 56 | 56 | - | 57 | 62 | 57 | 57 | 689.52052 | -0.50 | -0.5588 |
| 2614: | 53 | 63 | 53 | 53 | - | 54 | 62 | 54 | 54 | 691.73923 | -0.50 | -0.0152 |
| 2615: | 51 | 63 | 51 | 51 | - | 52 | 62 | 52 | 52 | 693.20460 | -0.50 | -0.3105 |
| 2616: | 50 | 63 | 50 | 50 | - | 51 | 62 | 51 | 51 | 693.93236 | -2.00 | -1.4365 |
| 2617: | 48 | 63 | 48 | 48 | - | 49 | 62 | 49 | 49 | 695.38363 | -0.50 | -0.0231 |
| 2618: | 47 | 63 | 47 | 47 | - | 48 | 62 | 48 | 48 | 696.10475 | -0.50 | 0.1350  |
| 2619: | 45 | 63 | 45 | 45 | - | 46 | 62 | 46 | 46 | 697.53785 | -1.50 | -0.7341 |
| 2620: | 44 | 63 | 44 | 44 | - | 45 | 62 | 45 | 45 | 698.25189 | -0.50 | 0.3075  |
| 2621: | 43 | 63 | 43 | 43 | - | 44 | 62 | 44 | 44 | 698.96241 | -0.50 | 0.4924  |
| 2622: | 42 | 63 | 42 | 42 | - | 43 | 62 | 43 | 43 | 699.66798 | -1.50 | -1.6051 |
| 2623: | 41 | 63 | 41 | 41 | - | 42 | 62 | 42 | 42 | 700.37433 | -0.50 | -0.2504 |
| 2624: | 40 | 63 | 40 | 40 | - | 41 | 62 | 41 | 41 | 701.07674 | -0.50 | -0.1593 |
| 2625: | 37 | 63 | 37 | 37 | - | 38 | 62 | 38 | 38 | 703.16879 | -1.00 | 1.0373  |
| 2626: | 35 | 63 | 35 | 35 | - | 36 | 62 | 36 | 36 | 704.54845 | -0.50 | 0.2587  |
| 2627: | 34 | 63 | 34 | 34 | - | 35 | 62 | 35 | 35 | 705.23453 | -0.50 | 0.1717  |
| 2628: | 33 | 63 | 33 | 33 | - | 34 | 62 | 34 | 34 | 705.91743 | -0.50 | -0.3877 |
| 2629: | 32 | 63 | 32 | 32 | - | 33 | 62 | 33 | 33 | 706.59831 | -0.50 | -0.2551 |
| 2630: | 31 | 63 | 31 | 31 | - | 32 | 62 | 32 | 32 | 707.27661 | -0.50 | 0.0139  |
| 2631: | 28 | 63 | 28 | 28 | - | 29 | 62 | 29 | 29 | 709.29446 | -0.50 | 0.1142  |
| 2632: | 27 | 63 | 27 | 27 | - | 28 | 62 | 28 | 28 | 709.96017 | -1.50 | -1.2964 |
| 2633: | 24 | 63 | 24 | 24 | - | 25 | 62 | 25 | 25 | 711.94549 | -1.00 | -0.8875 |
| 2634: | 23 | 63 | 23 | 23 | - | 24 | 62 | 24 | 24 | 712.60289 | -0.50 | 0.3740  |
| 2635: | 16 | 63 | 16 | 16 | - | 17 | 62 | 17 | 17 | 717.11804 | -0.50 | -0.0037 |
| 2636: | 15 | 63 | 15 | 15 | - | 16 | 62 | 16 | 16 | 717.75207 | -0.50 | 0.0683  |
| 2637: | 18 | 63 | 18 | 18 | - | 17 | 62 | 17 | 17 | 737.61389 | -0.50 | -0.9061 |
| 2638: | 19 | 63 | 19 | 19 | - | 18 | 62 | 18 | 18 | 738.14793 | -0.50 | -0.3373 |
| 2639: | 20 | 63 | 20 | 20 | - | 19 | 62 | 19 | 19 | 738.67834 | -0.50 | -0.4437 |
| 2640: | 23 | 63 | 23 | 23 | - | 22 | 62 | 22 | 22 | 740.25195 | -0.50 | -0.6073 |
| 2641: | 26 | 63 | 26 | 26 | - | 25 | 62 | 25 | 25 | 741.79886 | -0.50 | -0.7082 |
| 2642: | 27 | 63 | 27 | 27 | - | 26 | 62 | 26 | 26 | 742.31033 | -1.50 | 1.0609  |
| 2643: | 28 | 63 | 28 | 28 | - | 27 | 62 | 27 | 27 | 742.81723 | -1.50 | 1.2525  |
| 2644: | 29 | 63 | 29 | 29 | - | 28 | 62 | 28 | 28 | 743.31835 | -1.50 | -1.3386 |
| 2645: | 30 | 63 | 30 | 30 | - | 29 | 62 | 29 | 29 | 743.82041 | -1.50 | 0.0125  |
| 2646: | 31 | 63 | 31 | 31 | - | 30 | 62 | 30 | 30 | 744.31666 | -1.50 | -1.4397 |
| 2647: | 32 | 63 | 32 | 32 | - | 31 | 62 | 31 | 31 | 744.81295 | -0.50 | 0.1598  |
| 2648: | 33 | 63 | 33 | 33 | - | 32 | 62 | 32 | 32 | 745.30479 | -0.50 | 0.3256  |
| 2649: | 34 | 63 | 34 | 34 | - | 33 | 62 | 33 | 33 | 745.79284 | -0.50 | -0.2775 |
| 2650: | 36 | 63 | 36 | 36 | - | 35 | 62 | 35 | 35 | 746.76108 | -0.50 | -0.2610 |
| 2651: | 37 | 63 | 37 | 37 | - | 36 | 62 | 36 | 36 | 747.24096 | -0.50 | 0.0581  |
| 2652: | 38 | 63 | 38 | 38 | - | 37 | 62 | 37 | 37 | 747.71726 | -0.50 | -0.1626 |
| 2653: | 39 | 63 | 39 | 39 | - | 38 | 62 | 38 | 38 | 748.19051 | -0.50 | -0.3882 |
| 2654: | 40 | 63 | 40 | 40 | - | 39 | 62 | 39 | 39 | 748.66106 | -0.50 | -0.2639 |
| 2655: | 41 | 63 | 41 | 41 | - | 40 | 62 | 40 | 40 | 749.12784 | -1.00 | -0.8548 |
| 2656: | 43 | 63 | 43 | 43 | - | 42 | 62 | 42 | 42 | 750.05371 | -0.50 | -0.5435 |
| 2657: | 45 | 63 | 45 | 45 | - | 44 | 62 | 44 | 44 | 750.96699 | -0.50 | -0.5455 |
| 2658: | 47 | 63 | 47 | 47 | - | 46 | 62 | 46 | 46 | 751.86874 | -0.50 | 0.2378  |
| 2659: | 48 | 63 | 48 | 48 | - | 47 | 62 | 47 | 47 | 752.31365 | -1.00 | -0.7052 |
| 2660: | 52 | 63 | 52 | 52 | - | 51 | 62 | 51 | 51 | 754.06642 | -0.50 | -0.3652 |
| 2661: | 53 | 63 | 53 | 53 | - | 52 | 62 | 52 | 52 | 754.49717 | -0.50 | 0.0471  |
| 2662: | 54 | 63 | 54 | 54 | - | 53 | 62 | 53 | 53 | 754.92432 | -0.50 | -0.0228 |
| 2663: | 55 | 63 | 55 | 55 | - | 54 | 62 | 54 | 54 | 755.34885 | -0.50 | 0.4098  |
| 2664: | 56 | 63 | 56 | 56 | - | 55 | 62 | 55 | 55 | 755.77093 | -1.50 | 1.5199  |
| 2665: | 57 | 63 | 57 | 57 | - | 56 | 62 | 56 | 56 | 756.18748 | -0.50 | 0.2323  |
| 2666: | 59 | 63 | 59 | 59 | - | 58 | 62 | 58 | 58 | 757.01521 | -1.50 | 1.7038  |
| 2667: | 63 | 63 | 63 | 63 | - | 62 | 62 | 62 | 62 | 758.62977 | -1.50 | 1.5511  |
| 2668: | 64 | 63 | 64 | 64 | - | 63 | 62 | 63 | 63 | 759.02234 | -1.50 | -1.6524 |

(30)Si(32)S

|       |    |     |    |    |   |    |     |    |    |           |       |         |
|-------|----|-----|----|----|---|----|-----|----|----|-----------|-------|---------|
| 2669: | 72 | 101 | 72 | 72 | - | 73 | 100 | 73 | 73 | 681.53195 | -0.50 | 0.3064  |
| 2670: | 71 | 101 | 71 | 71 | - | 72 | 100 | 72 | 72 | 682.30559 | -0.50 | 0.3279  |
| 2671: | 70 | 101 | 70 | 70 | - | 71 | 100 | 71 | 71 | 683.07636 | -0.50 | -0.0388 |
| 2672: | 69 | 101 | 69 | 69 | - | 70 | 100 | 70 | 70 | 683.84371 | -1.00 | -1.3394 |
| 2673: | 67 | 101 | 67 | 67 | - | 68 | 100 | 68 | 68 | 685.37510 | -0.50 | 0.2238  |
| 2674: | 64 | 101 | 64 | 64 | - | 65 | 100 | 65 | 65 | 687.65144 | -0.50 | 0.5723  |
| 2675: | 63 | 101 | 63 | 63 | - | 64 | 100 | 64 | 64 | 688.40366 | -0.50 | -0.8553 |
| 2676: | 62 | 101 | 62 | 62 | - | 63 | 100 | 63 | 63 | 689.15570 | -0.50 | 0.0522  |

|       |    |     |    |    |   |    |     |    |    |           |       |         |
|-------|----|-----|----|----|---|----|-----|----|----|-----------|-------|---------|
| 2677: | 61 | 101 | 61 | 61 | - | 62 | 100 | 62 | 62 | 689.90439 | -0.50 | 0.1288  |
| 2678: | 57 | 101 | 57 | 57 | - | 58 | 100 | 58 | 58 | 692.87337 | -0.50 | -0.0690 |
| 2679: | 56 | 101 | 56 | 56 | - | 57 | 100 | 57 | 57 | 693.60903 | -0.50 | -0.3637 |
| 2680: | 55 | 101 | 55 | 55 | - | 56 | 100 | 56 | 56 | 694.34299 | -0.50 | 0.1860  |
| 2681: | 54 | 101 | 54 | 54 | - | 55 | 100 | 55 | 55 | 695.07335 | -0.50 | -0.3158 |
| 2682: | 53 | 101 | 53 | 53 | - | 54 | 100 | 54 | 54 | 695.80046 | -1.50 | -1.5149 |
| 2683: | 52 | 101 | 52 | 52 | - | 53 | 100 | 53 | 53 | 696.52768 | -0.50 | -0.0471 |
| 2684: | 51 | 101 | 51 | 51 | - | 52 | 100 | 52 | 52 | 697.25132 | -0.50 | 0.4019  |
| 2685: | 50 | 101 | 50 | 50 | - | 51 | 100 | 51 | 51 | 697.97192 | -0.50 | 0.3762  |
| 2686: | 49 | 101 | 49 | 49 | - | 50 | 100 | 50 | 50 | 698.68940 | -0.50 | -0.1999 |
| 2687: | 48 | 101 | 48 | 48 | - | 49 | 100 | 49 | 49 | 699.40464 | -0.50 | -0.4422 |
| 2688: | 47 | 101 | 47 | 47 | - | 48 | 100 | 48 | 48 | 700.11835 | -0.50 | 0.3636  |
| 2689: | 44 | 101 | 44 | 44 | - | 45 | 100 | 45 | 45 | 702.24217 | -1.50 | 0.9816  |
| 2690: | 42 | 101 | 42 | 42 | - | 43 | 100 | 43 | 43 | 703.64390 | -0.50 | 0.2116  |
| 2691: | 40 | 101 | 40 | 40 | - | 41 | 100 | 41 | 41 | 705.03449 | -1.50 | -1.2842 |
| 2692: | 39 | 101 | 39 | 39 | - | 40 | 100 | 40 | 40 | 705.72803 | -0.50 | 0.1289  |
| 2693: | 37 | 101 | 37 | 37 | - | 38 | 100 | 38 | 38 | 707.10531 | -1.50 | 1.0085  |
| 2694: | 35 | 101 | 35 | 35 | - | 36 | 100 | 36 | 36 | 708.47216 | -2.50 | 1.9577  |
| 2695: | 33 | 101 | 33 | 33 | - | 34 | 100 | 34 | 34 | 709.82597 | -0.50 | 0.4009  |
| 2696: | 32 | 101 | 32 | 32 | - | 33 | 100 | 33 | 33 | 710.49946 | -0.50 | 0.1684  |
| 2697: | 31 | 101 | 31 | 31 | - | 32 | 100 | 32 | 32 | 711.17148 | -2.00 | 1.1124  |
| 2698: | 30 | 101 | 30 | 30 | - | 31 | 100 | 31 | 31 | 711.83922 | -0.50 | 0.4271  |
| 2699: | 29 | 101 | 29 | 29 | - | 30 | 100 | 30 | 30 | 712.50660 | -2.50 | 2.0368  |
| 2700: | 28 | 101 | 28 | 28 | - | 29 | 100 | 29 | 29 | 713.16832 | -0.50 | 0.6459  |
| 2701: | 26 | 101 | 26 | 26 | - | 27 | 100 | 27 | 27 | 714.48668 | -0.50 | 0.7793  |
| 2702: | 25 | 101 | 25 | 25 | - | 26 | 100 | 26 | 26 | 715.13912 | -2.50 | -1.8877 |
| 2703: | 23 | 101 | 23 | 23 | - | 24 | 100 | 24 | 24 | 716.44339 | -0.50 | 0.2027  |
| 2704: | 22 | 101 | 22 | 22 | - | 23 | 100 | 23 | 23 | 717.09003 | -0.50 | -0.2212 |
| 2705: | 21 | 101 | 21 | 21 | - | 22 | 100 | 22 | 22 | 717.73447 | -0.50 | -0.1555 |
| 2706: | 19 | 101 | 19 | 19 | - | 20 | 100 | 20 | 20 | 719.01379 | -2.00 | -1.4976 |
| 2707: | 18 | 101 | 18 | 18 | - | 19 | 100 | 19 | 19 | 719.65161 | -0.50 | 0.0434  |
| 2708: | 16 | 101 | 16 | 16 | - | 17 | 100 | 17 | 17 | 720.91519 | -1.50 | -0.8090 |
| 2709: | 15 | 101 | 15 | 15 | - | 16 | 100 | 16 | 16 | 721.54528 | -1.50 | 1.1365  |
| 2710: | 14 | 101 | 14 | 14 | - | 15 | 100 | 15 | 15 | 722.17000 | -0.50 | 0.4322  |
| 2711: | 13 | 101 | 13 | 13 | - | 14 | 100 | 14 | 14 | 722.79226 | -0.50 | -0.0075 |
| 2712: | 12 | 101 | 12 | 12 | - | 13 | 100 | 13 | 13 | 723.41322 | -0.50 | 0.9818  |
| 2713: | 10 | 101 | 10 | 10 | - | 11 | 100 | 11 | 11 | 724.64464 | -0.50 | 0.6652  |
| 2714: | 8  | 101 | 8  | 8  | - | 9  | 100 | 9  | 9  | 725.86452 | -0.50 | -0.2226 |
| 2715: | 7  | 101 | 7  | 7  | - | 8  | 100 | 8  | 8  | 726.47093 | -0.50 | -0.0722 |
| 2716: | 9  | 101 | 9  | 9  | - | 8  | 100 | 8  | 8  | 736.35247 | -0.50 | 0.2525  |
| 2717: | 10 | 101 | 10 | 10 | - | 9  | 100 | 9  | 9  | 736.90932 | -1.50 | 1.1198  |
| 2718: | 11 | 101 | 11 | 11 | - | 10 | 100 | 10 | 10 | 737.46051 | -1.00 | -0.8373 |
| 2719: | 12 | 101 | 12 | 12 | - | 11 | 100 | 11 | 11 | 738.01106 | -1.50 | -0.5943 |
| 2720: | 13 | 101 | 13 | 13 | - | 12 | 100 | 12 | 12 | 738.55879 | -0.50 | -0.3268 |
| 2721: | 15 | 101 | 15 | 15 | - | 14 | 100 | 14 | 14 | 739.64514 | -0.50 | -0.3501 |
| 2722: | 17 | 101 | 17 | 17 | - | 16 | 100 | 16 | 16 | 740.72064 | -0.50 | 0.2089  |
| 2723: | 18 | 101 | 18 | 18 | - | 17 | 100 | 17 | 17 | 741.25304 | -0.50 | -0.5632 |
| 2724: | 19 | 101 | 19 | 19 | - | 18 | 100 | 18 | 18 | 741.78350 | -0.50 | -0.4037 |
| 2725: | 20 | 101 | 20 | 20 | - | 19 | 100 | 19 | 19 | 742.31033 | -1.50 | -0.9981 |
| 2726: | 21 | 101 | 21 | 21 | - | 20 | 100 | 20 | 20 | 742.83562 | -0.50 | -0.2517 |
| 2727: | 22 | 101 | 22 | 22 | - | 21 | 100 | 21 | 21 | 743.35804 | -0.50 | 0.5098  |
| 2728: | 25 | 101 | 25 | 25 | - | 24 | 100 | 24 | 24 | 744.90483 | -0.50 | -0.3188 |
| 2729: | 26 | 101 | 26 | 26 | - | 25 | 100 | 25 | 25 | 745.41472 | -0.50 | -0.5010 |
| 2730: | 27 | 101 | 27 | 27 | - | 26 | 100 | 26 | 26 | 745.92261 | -0.50 | 0.2248  |
| 2731: | 30 | 101 | 30 | 30 | - | 29 | 100 | 29 | 29 | 747.42455 | -2.00 | -1.8344 |
| 2732: | 31 | 101 | 31 | 31 | - | 30 | 100 | 30 | 30 | 747.92179 | -0.50 | -0.0812 |
| 2733: | 32 | 101 | 32 | 32 | - | 31 | 100 | 31 | 31 | 748.41446 | -0.50 | 0.0329  |
| 2734: | 34 | 101 | 34 | 34 | - | 33 | 100 | 33 | 33 | 749.39148 | -1.00 | 0.7517  |
| 2735: | 35 | 101 | 35 | 35 | - | 34 | 100 | 34 | 34 | 749.87485 | -0.50 | 0.3857  |
| 2736: | 36 | 101 | 36 | 36 | - | 35 | 100 | 35 | 35 | 750.35489 | -0.50 | -0.3612 |
| 2737: | 37 | 101 | 37 | 37 | - | 36 | 100 | 36 | 36 | 750.83291 | -0.50 | -0.1743 |
| 2738: | 38 | 101 | 38 | 38 | - | 37 | 100 | 37 | 37 | 751.30742 | -0.50 | -0.5391 |
| 2739: | 39 | 101 | 39 | 39 | - | 38 | 100 | 38 | 38 | 751.77950 | -0.50 | -0.3709 |
| 2740: | 40 | 101 | 40 | 40 | - | 39 | 100 | 39 | 39 | 752.24851 | -0.50 | -0.3051 |
| 2741: | 41 | 101 | 41 | 41 | - | 40 | 100 | 40 | 40 | 752.71522 | -0.50 | 0.4329  |
| 2742: | 42 | 101 | 42 | 42 | - | 41 | 100 | 41 | 41 | 753.17811 | -0.50 | 0.3278  |
| 2743: | 45 | 101 | 45 | 45 | - | 44 | 100 | 44 | 44 | 754.55012 | -1.50 | 1.2595  |
| 2744: | 47 | 101 | 47 | 47 | - | 46 | 100 | 46 | 46 | 755.44571 | -2.00 | -2.2336 |
| 2745: | 48 | 101 | 48 | 48 | - | 47 | 100 | 47 | 47 | 755.89285 | -0.50 | -0.1304 |
| 2746: | 50 | 101 | 50 | 50 | - | 49 | 100 | 49 | 49 | 756.77420 | -0.50 | 0.1785  |
| 2747: | 51 | 101 | 51 | 51 | - | 50 | 100 | 50 | 50 | 757.21018 | -0.50 | 0.1635  |

|       |    |     |    |    |   |    |     |    |    |           |       |         |
|-------|----|-----|----|----|---|----|-----|----|----|-----------|-------|---------|
| 2748: | 52 | 101 | 52 | 52 | - | 51 | 100 | 51 | 51 | 757.64348 | -0.50 | 0.4919  |
| 2749: | 54 | 101 | 54 | 54 | - | 53 | 100 | 53 | 53 | 758.49979 | -0.50 | -0.0527 |
| 2750: | 56 | 101 | 56 | 56 | - | 55 | 100 | 55 | 55 | 759.34499 | -0.50 | 0.4421  |
| 2751: | 57 | 101 | 57 | 57 | - | 56 | 100 | 56 | 56 | 759.76270 | -0.50 | 0.3673  |
| 2752: | 58 | 101 | 58 | 58 | - | 57 | 100 | 57 | 57 | 760.17735 | -0.50 | 0.2839  |
| 2753: | 59 | 101 | 59 | 59 | - | 58 | 100 | 58 | 58 | 760.58856 | -0.50 | -0.1834 |
| 2754: | 61 | 101 | 61 | 61 | - | 60 | 100 | 60 | 60 | 761.40346 | -0.50 | 0.5493  |
| 2755: | 63 | 101 | 63 | 63 | - | 62 | 100 | 62 | 62 | 762.20454 | -0.50 | -0.2569 |
| 2756: | 65 | 101 | 65 | 65 | - | 64 | 100 | 64 | 64 | 762.99339 | -1.00 | -0.9742 |
| 2757: | 66 | 101 | 66 | 66 | - | 65 | 100 | 65 | 65 | 763.38635 | -1.50 | 1.8336  |
| 2758: | 67 | 101 | 67 | 67 | - | 66 | 100 | 66 | 66 | 763.77085 | -1.00 | -0.7247 |
| 2759: | 68 | 101 | 68 | 68 | - | 67 | 100 | 67 | 67 | 764.15465 | -1.00 | -0.8842 |
| 2760: | 69 | 101 | 69 | 69 | - | 68 | 100 | 68 | 68 | 764.53681 | -0.50 | 0.4196  |
| 2761: | 72 | 101 | 72 | 72 | - | 71 | 100 | 71 | 71 | 765.66006 | -0.50 | -0.2304 |
| 2762: | 74 | 101 | 74 | 74 | - | 73 | 100 | 73 | 73 | 766.39366 | -0.50 | -0.2925 |
| 2763: | 85 | 102 | 85 | 85 | - | 86 | 101 | 86 | 86 | 666.51066 | -1.50 | 0.8211  |
| 2764: | 82 | 102 | 82 | 82 | - | 83 | 101 | 83 | 83 | 668.91159 | -1.50 | 0.8201  |
| 2765: | 77 | 102 | 77 | 77 | - | 78 | 101 | 78 | 78 | 672.86225 | -1.50 | -1.2722 |
| 2766: | 74 | 102 | 74 | 74 | - | 75 | 101 | 75 | 75 | 675.20623 | -1.00 | 0.5154  |
| 2767: | 73 | 102 | 73 | 73 | - | 74 | 101 | 74 | 74 | 675.98059 | -1.50 | -0.9211 |
| 2768: | 72 | 102 | 72 | 72 | - | 73 | 101 | 73 | 73 | 676.75441 | -1.50 | -0.4235 |
| 2769: | 65 | 102 | 65 | 65 | - | 66 | 101 | 66 | 66 | 682.10020 | -1.50 | 1.7272  |
| 2770: | 63 | 102 | 63 | 63 | - | 64 | 101 | 64 | 64 | 683.60304 | -0.50 | 0.3142  |
| 2771: | 62 | 102 | 62 | 62 | - | 63 | 101 | 63 | 63 | 684.35096 | -0.50 | -0.1213 |
| 2772: | 59 | 102 | 59 | 59 | - | 60 | 101 | 60 | 60 | 686.58054 | -0.50 | -0.4743 |
| 2773: | 58 | 102 | 58 | 58 | - | 59 | 101 | 59 | 59 | 687.31861 | -0.50 | -0.6568 |
| 2774: | 57 | 102 | 57 | 57 | - | 58 | 101 | 58 | 58 | 688.05510 | -0.50 | 0.1168  |
| 2775: | 56 | 102 | 56 | 56 | - | 57 | 101 | 57 | 57 | 688.78778 | -0.50 | -0.3792 |
| 2776: | 55 | 102 | 55 | 55 | - | 56 | 101 | 56 | 56 | 689.52052 | -1.00 | 1.7294  |
| 2777: | 53 | 102 | 53 | 53 | - | 54 | 101 | 54 | 54 | 690.97430 | -1.00 | 1.8971  |
| 2778: | 52 | 102 | 52 | 52 | - | 53 | 101 | 53 | 53 | 691.69525 | -0.50 | -0.1254 |
| 2779: | 49 | 102 | 49 | 49 | - | 50 | 101 | 50 | 50 | 693.84868 | -0.50 | -0.2277 |
| 2780: | 48 | 102 | 48 | 48 | - | 49 | 101 | 49 | 49 | 694.56206 | -0.50 | 0.4506  |
| 2781: | 47 | 102 | 47 | 47 | - | 48 | 101 | 48 | 48 | 695.27131 | -0.50 | -0.4228 |
| 2782: | 46 | 102 | 46 | 46 | - | 47 | 101 | 47 | 47 | 695.97933 | -0.50 | 0.0564  |
| 2783: | 45 | 102 | 45 | 45 | - | 46 | 101 | 46 | 46 | 696.68475 | -0.50 | 0.5223  |
| 2784: | 44 | 102 | 44 | 44 | - | 45 | 101 | 45 | 45 | 697.38555 | -1.50 | -1.0409 |
| 2785: | 43 | 102 | 43 | 43 | - | 44 | 101 | 44 | 44 | 698.08700 | -1.00 | 0.6412  |
| 2786: | 42 | 102 | 42 | 42 | - | 43 | 101 | 43 | 43 | 698.78456 | -1.00 | 1.0329  |
| 2787: | 41 | 102 | 41 | 41 | - | 42 | 101 | 42 | 42 | 699.47827 | -0.50 | 0.1782  |
| 2788: | 40 | 102 | 40 | 40 | - | 41 | 101 | 41 | 41 | 700.16985 | -0.50 | -0.1984 |
| 2789: | 39 | 102 | 39 | 39 | - | 40 | 101 | 40 | 40 | 700.85918 | -0.50 | -0.2127 |
| 2790: | 38 | 102 | 38 | 38 | - | 39 | 101 | 39 | 39 | 701.54581 | -0.50 | -0.3105 |
| 2791: | 36 | 102 | 36 | 36 | - | 37 | 101 | 37 | 37 | 702.91197 | -0.50 | 0.2608  |
| 2792: | 34 | 102 | 34 | 34 | - | 35 | 101 | 35 | 35 | 704.26675 | -0.50 | -0.0303 |
| 2793: | 33 | 102 | 33 | 33 | - | 34 | 101 | 34 | 34 | 704.93927 | -1.50 | -1.0911 |
| 2794: | 32 | 102 | 32 | 32 | - | 33 | 101 | 33 | 33 | 705.61145 | -0.50 | 0.1505  |
| 2795: | 31 | 102 | 31 | 31 | - | 32 | 101 | 32 | 32 | 706.27979 | -1.50 | 0.1987  |
| 2796: | 29 | 102 | 29 | 29 | - | 30 | 101 | 30 | 30 | 707.60984 | -1.50 | 1.6220  |
| 2797: | 27 | 102 | 27 | 27 | - | 28 | 101 | 28 | 28 | 708.92667 | -0.50 | 0.4635  |
| 2798: | 26 | 102 | 26 | 26 | - | 27 | 101 | 27 | 27 | 709.57963 | -1.50 | -1.5706 |
| 2799: | 25 | 102 | 25 | 25 | - | 26 | 101 | 26 | 26 | 710.23408 | -1.50 | 0.5578  |
| 2800: | 24 | 102 | 24 | 24 | - | 25 | 101 | 25 | 25 | 710.88279 | -0.50 | -0.3770 |
| 2801: | 16 | 102 | 16 | 16 | - | 17 | 101 | 17 | 17 | 715.98436 | -1.00 | 0.9233  |
| 2802: | 13 | 102 | 13 | 13 | - | 14 | 101 | 14 | 14 | 717.85055 | -1.00 | -0.7926 |
| 2803: | 9  | 102 | 9  | 9  | - | 8  | 101 | 8  | 8  | 731.34724 | -0.50 | 0.1283  |
| 2804: | 10 | 102 | 10 | 10 | - | 9  | 101 | 9  | 9  | 731.89948 | -0.50 | -0.8207 |
| 2805: | 12 | 102 | 12 | 12 | - | 11 | 101 | 11 | 11 | 732.99762 | -0.50 | -0.5467 |
| 2806: | 16 | 102 | 16 | 16 | - | 15 | 101 | 15 | 15 | 735.15899 | -0.50 | -0.7342 |
| 2807: | 17 | 102 | 17 | 17 | - | 16 | 101 | 16 | 16 | 735.69340 | -0.50 | 0.4324  |
| 2808: | 18 | 102 | 18 | 18 | - | 17 | 101 | 17 | 17 | 736.22322 | -0.50 | -0.1235 |
| 2809: | 19 | 102 | 19 | 19 | - | 18 | 101 | 18 | 18 | 736.75095 | -0.50 | 0.1026  |
| 2810: | 20 | 102 | 20 | 20 | - | 19 | 101 | 19 | 19 | 737.27625 | -1.00 | 0.7752  |
| 2811: | 21 | 102 | 21 | 21 | - | 20 | 101 | 20 | 20 | 737.79807 | -1.00 | 0.8488  |
| 2812: | 22 | 102 | 22 | 22 | - | 21 | 101 | 21 | 21 | 738.31502 | -1.50 | -1.0620 |
| 2813: | 23 | 102 | 23 | 23 | - | 22 | 101 | 22 | 22 | 738.83160 | -0.50 | -0.4526 |
| 2814: | 24 | 102 | 24 | 24 | - | 23 | 101 | 23 | 23 | 739.34513 | -0.50 | 0.0014  |
| 2815: | 25 | 102 | 25 | 25 | - | 24 | 101 | 24 | 24 | 739.85502 | -0.50 | -0.2853 |
| 2816: | 26 | 102 | 26 | 26 | - | 25 | 101 | 25 | 25 | 740.36297 | -0.50 | 0.3919  |
| 2817: | 27 | 102 | 27 | 27 | - | 26 | 101 | 26 | 26 | 740.86769 | -0.50 | 0.7473  |
| 2818: | 29 | 102 | 29 | 29 | - | 28 | 101 | 28 | 28 | 741.86733 | -0.50 | 0.4017  |

|       |    |     |    |    |   |    |     |    |    |           |       |         |
|-------|----|-----|----|----|---|----|-----|----|----|-----------|-------|---------|
| 2819: | 30 | 102 | 30 | 30 | - | 29 | 101 | 29 | 29 | 742.36354 | -1.00 | 0.9997  |
| 2820: | 31 | 102 | 31 | 31 | - | 30 | 101 | 30 | 30 | 742.85428 | -1.50 | -0.9456 |
| 2821: | 32 | 102 | 32 | 32 | - | 31 | 101 | 31 | 31 | 743.34671 | -2.50 | 1.7304  |
| 2822: | 33 | 102 | 33 | 33 | - | 32 | 101 | 32 | 32 | 743.83170 | -0.50 | -0.0978 |
| 2823: | 34 | 102 | 34 | 34 | - | 33 | 101 | 33 | 33 | 744.31666 | -1.00 | 0.9845  |
| 2824: | 35 | 102 | 35 | 35 | - | 34 | 101 | 34 | 34 | 744.79546 | -2.00 | -1.1482 |
| 2825: | 36 | 102 | 36 | 36 | - | 35 | 101 | 35 | 35 | 745.27438 | -0.50 | -0.2112 |
| 2826: | 39 | 102 | 39 | 39 | - | 38 | 101 | 38 | 38 | 746.69095 | -0.50 | 0.1538  |
| 2827: | 40 | 102 | 40 | 40 | - | 39 | 101 | 39 | 39 | 747.15689 | -0.50 | -0.0444 |
| 2828: | 41 | 102 | 41 | 41 | - | 40 | 101 | 40 | 40 | 747.62035 | -0.50 | 0.2502  |
| 2829: | 42 | 102 | 42 | 42 | - | 41 | 101 | 41 | 41 | 748.08056 | -0.50 | 0.2721  |
| 2830: | 43 | 102 | 43 | 43 | - | 42 | 101 | 42 | 42 | 748.53765 | -0.50 | 0.1561  |
| 2831: | 48 | 102 | 48 | 48 | - | 47 | 101 | 47 | 47 | 750.77860 | -0.50 | -0.0309 |
| 2832: | 49 | 102 | 49 | 49 | - | 48 | 101 | 48 | 48 | 751.21825 | -0.50 | 0.4029  |
| 2833: | 50 | 102 | 50 | 50 | - | 49 | 101 | 49 | 49 | 751.65417 | -0.50 | 0.1214  |
| 2834: | 52 | 102 | 52 | 52 | - | 51 | 101 | 51 | 51 | 752.51763 | -0.50 | 0.2410  |
| 2835: | 53 | 102 | 53 | 53 | - | 52 | 101 | 52 | 52 | 752.94424 | -0.50 | -0.2785 |
| 2836: | 54 | 102 | 54 | 54 | - | 53 | 101 | 53 | 53 | 753.36667 | -1.50 | -1.9446 |
| 2837: | 55 | 102 | 55 | 55 | - | 54 | 101 | 54 | 54 | 753.78880 | -1.00 | -0.8726 |
| 2838: | 56 | 102 | 56 | 56 | - | 55 | 101 | 55 | 55 | 754.20768 | -0.50 | -0.0079 |
| 2839: | 58 | 102 | 58 | 58 | - | 57 | 101 | 57 | 57 | 755.03484 | -0.50 | 0.2688  |
| 2840: | 64 | 102 | 64 | 64 | - | 63 | 101 | 63 | 63 | 757.44208 | -0.50 | 0.3762  |
| 2841: | 65 | 102 | 65 | 65 | - | 64 | 101 | 64 | 64 | 757.83024 | -2.00 | -1.8816 |
| 2842: | 67 | 102 | 67 | 67 | - | 66 | 101 | 66 | 66 | 758.60356 | -0.50 | -0.1221 |
| 2843: | 70 | 102 | 70 | 70 | - | 69 | 101 | 69 | 69 | 759.73748 | -0.50 | -0.2838 |
| 2844: | 74 | 102 | 74 | 74 | - | 73 | 101 | 73 | 73 | 761.20669 | -1.50 | 0.4349  |
| 2845: | 75 | 102 | 75 | 75 | - | 74 | 101 | 74 | 74 | 761.56438 | -1.50 | -1.1771 |
| 2846: | 76 | 102 | 76 | 76 | - | 75 | 101 | 75 | 75 | 761.91951 | -2.00 | -2.2112 |
| 2847: | 51 | 103 | 51 | 51 | - | 52 | 102 | 52 | 52 | 687.58667 | -1.00 | 0.5610  |
| 2848: | 48 | 103 | 48 | 48 | - | 49 | 102 | 49 | 49 | 689.72409 | -0.50 | 0.4873  |
| 2849: | 47 | 103 | 47 | 47 | - | 48 | 102 | 48 | 48 | 690.43111 | -0.50 | 0.1609  |
| 2850: | 46 | 103 | 46 | 46 | - | 47 | 102 | 47 | 47 | 691.13690 | -1.00 | 1.1873  |
| 2851: | 44 | 103 | 44 | 44 | - | 45 | 102 | 45 | 45 | 692.53728 | -0.50 | -0.1944 |
| 2852: | 43 | 103 | 43 | 43 | - | 44 | 102 | 44 | 44 | 693.23524 | -0.50 | 0.7759  |
| 2853: | 41 | 103 | 41 | 41 | - | 42 | 102 | 42 | 42 | 694.62002 | -1.00 | -0.6198 |
| 2854: | 40 | 103 | 40 | 40 | - | 41 | 102 | 41 | 41 | 695.31029 | -0.50 | 0.4727  |
| 2855: | 39 | 103 | 39 | 39 | - | 40 | 102 | 40 | 40 | 695.99777 | -1.00 | 1.3878  |
| 2856: | 37 | 103 | 37 | 37 | - | 38 | 102 | 38 | 38 | 697.36260 | -1.00 | 0.9427  |
| 2857: | 34 | 103 | 34 | 34 | - | 35 | 102 | 35 | 35 | 699.39013 | -0.50 | 0.2614  |
| 2858: | 33 | 103 | 33 | 33 | - | 34 | 102 | 34 | 34 | 700.06058 | -0.50 | -0.0883 |
| 2859: | 32 | 103 | 32 | 32 | - | 33 | 102 | 33 | 33 | 700.72714 | -1.50 | -1.6853 |
| 2860: | 29 | 103 | 29 | 29 | - | 30 | 102 | 30 | 30 | 702.71770 | -0.50 | 0.3020  |
| 2861: | 26 | 103 | 26 | 26 | - | 27 | 102 | 27 | 27 | 704.68188 | -0.50 | -0.1523 |
| 2862: | 25 | 103 | 25 | 25 | - | 26 | 102 | 26 | 26 | 705.33261 | -1.50 | 1.0394  |
| 2863: | 24 | 103 | 24 | 24 | - | 25 | 102 | 25 | 25 | 705.97764 | -1.00 | -0.7918 |
| 2864: | 22 | 103 | 22 | 22 | - | 23 | 102 | 23 | 23 | 707.26475 | -1.00 | 0.6447  |
| 2865: | 15 | 103 | 15 | 15 | - | 16 | 102 | 16 | 16 | 711.67929 | -0.50 | 0.2965  |
| 2866: | 12 | 103 | 12 | 12 | - | 13 | 102 | 13 | 13 | 713.53018 | -0.50 | -0.1847 |
| 2867: | 9  | 103 | 9  | 9  | - | 10 | 102 | 10 | 10 | 715.35681 | -0.50 | -0.3206 |
| 2868: | 11 | 103 | 11 | 11 | - | 10 | 102 | 10 | 10 | 727.44491 | -0.50 | -0.5977 |
| 2869: | 18 | 103 | 18 | 18 | - | 17 | 102 | 17 | 17 | 731.19853 | -0.50 | -0.0896 |
| 2870: | 19 | 103 | 19 | 19 | - | 18 | 102 | 18 | 18 | 731.72413 | -1.00 | 0.8050  |
| 2871: | 28 | 103 | 28 | 28 | - | 27 | 102 | 27 | 27 | 736.31612 | -0.50 | 0.4565  |
| 2872: | 34 | 103 | 34 | 34 | - | 33 | 102 | 33 | 33 | 739.24633 | -0.50 | 0.2142  |
| 2873: | 36 | 103 | 36 | 36 | - | 35 | 102 | 35 | 35 | 740.19993 | -0.50 | 0.5128  |
| 2874: | 37 | 103 | 37 | 37 | - | 36 | 102 | 36 | 36 | 740.67281 | -1.50 | 1.1721  |
| 2875: | 42 | 103 | 42 | 42 | - | 41 | 102 | 41 | 41 | 742.98819 | -0.50 | -0.0661 |
| 2876: | 44 | 103 | 44 | 44 | - | 43 | 102 | 43 | 43 | 743.89566 | -1.50 | 1.6030  |
| 2877: | 50 | 103 | 50 | 50 | - | 49 | 102 | 49 | 49 | 746.53770 | -1.50 | -1.8015 |
| 2878: | 52 | 103 | 52 | 52 | - | 51 | 102 | 51 | 51 | 747.39755 | -0.50 | 0.3444  |
| 2879: | 54 | 103 | 54 | 54 | - | 53 | 102 | 53 | 53 | 748.24350 | -0.50 | 0.7083  |
| 2880: | 55 | 103 | 55 | 55 | - | 54 | 102 | 54 | 54 | 748.66106 | -0.50 | 0.0312  |
| 2881: | 56 | 103 | 56 | 56 | - | 55 | 102 | 55 | 55 | 749.07638 | -0.50 | 0.1578  |
| 2882: | 60 | 103 | 60 | 60 | - | 59 | 102 | 59 | 59 | 750.70593 | -0.50 | -0.5352 |
| 2883: | 61 | 103 | 61 | 61 | - | 60 | 102 | 60 | 60 | 751.10436 | -1.50 | -2.0096 |
| 2884: | 66 | 103 | 66 | 66 | - | 65 | 102 | 65 | 65 | 753.05839 | -1.50 | -1.3260 |

(28)Si(34)S

|       |    |     |    |    |   |    |     |    |    |           |       |         |
|-------|----|-----|----|----|---|----|-----|----|----|-----------|-------|---------|
| 2885: | 89 | 171 | 89 | 89 | - | 90 | 170 | 90 | 90 | 670.47812 | -0.50 | -0.1621 |
| 2886: | 88 | 171 | 88 | 88 | - | 89 | 170 | 89 | 89 | 671.30220 | -1.00 | 0.9777  |
| 2887: | 85 | 171 | 85 | 85 | - | 86 | 170 | 86 | 86 | 673.75537 | -0.50 | -0.0070 |

|       |    |     |    |    |   |    |     |    |    |           |       |         |
|-------|----|-----|----|----|---|----|-----|----|----|-----------|-------|---------|
| 2888: | 84 | 171 | 84 | 84 | - | 85 | 170 | 85 | 85 | 674.56794 | -0.50 | -0.5864 |
| 2889: | 78 | 171 | 78 | 78 | - | 79 | 170 | 79 | 79 | 679.39578 | -0.50 | 0.1194  |
| 2890: | 76 | 171 | 76 | 76 | - | 77 | 170 | 77 | 77 | 680.98509 | -0.50 | 0.2028  |
| 2891: | 75 | 171 | 75 | 75 | - | 76 | 170 | 76 | 76 | 681.77486 | -0.50 | -0.9059 |
| 2892: | 74 | 171 | 74 | 74 | - | 75 | 170 | 75 | 75 | 682.56436 | -0.50 | 0.2107  |
| 2893: | 73 | 171 | 73 | 73 | - | 74 | 170 | 74 | 74 | 683.35063 | -0.50 | 0.5967  |
| 2894: | 72 | 171 | 72 | 72 | - | 73 | 170 | 73 | 73 | 684.13299 | -0.50 | -0.4237 |
| 2895: | 71 | 171 | 71 | 71 | - | 72 | 170 | 72 | 72 | 684.91500 | -1.00 | 0.7138  |
| 2896: | 70 | 171 | 70 | 70 | - | 71 | 170 | 71 | 71 | 685.69338 | -1.00 | 0.7333  |
| 2897: | 69 | 171 | 69 | 69 | - | 70 | 170 | 70 | 70 | 686.46855 | -0.50 | 0.0589  |
| 2898: | 68 | 171 | 68 | 68 | - | 69 | 170 | 69 | 69 | 687.24228 | -0.50 | 0.4650  |
| 2899: | 67 | 171 | 67 | 67 | - | 68 | 170 | 68 | 68 | 688.01309 | -0.50 | 0.4757  |
| 2900: | 65 | 171 | 65 | 65 | - | 66 | 170 | 66 | 66 | 689.54595 | -0.50 | -0.6723 |
| 2901: | 64 | 171 | 64 | 64 | - | 65 | 170 | 65 | 65 | 690.30999 | -0.50 | 0.1674  |
| 2902: | 62 | 171 | 62 | 62 | - | 63 | 170 | 63 | 63 | 691.82805 | -0.50 | -0.5444 |
| 2903: | 61 | 171 | 61 | 61 | - | 62 | 170 | 62 | 62 | 692.58433 | -0.50 | 0.1725  |
| 2904: | 59 | 171 | 59 | 59 | - | 60 | 170 | 60 | 60 | 694.08784 | -0.50 | 0.2230  |
| 2905: | 58 | 171 | 58 | 58 | - | 59 | 170 | 59 | 59 | 694.83529 | -0.50 | -0.2148 |
| 2906: | 57 | 171 | 57 | 57 | - | 58 | 170 | 58 | 58 | 695.58089 | -0.50 | 0.0643  |
| 2907: | 54 | 171 | 54 | 54 | - | 55 | 170 | 55 | 55 | 697.80103 | -0.50 | -0.3143 |
| 2908: | 53 | 171 | 53 | 53 | - | 54 | 170 | 54 | 54 | 698.53595 | -0.50 | -0.4048 |
| 2909: | 51 | 171 | 51 | 51 | - | 52 | 170 | 52 | 52 | 699.99880 | -0.50 | 0.1932  |
| 2910: | 50 | 171 | 50 | 50 | - | 51 | 170 | 51 | 51 | 700.72714 | -1.50 | 1.3004  |
| 2911: | 49 | 171 | 49 | 49 | - | 50 | 170 | 50 | 50 | 701.44928 | -1.00 | -1.1913 |
| 2912: | 46 | 171 | 46 | 46 | - | 47 | 170 | 47 | 47 | 703.60846 | -0.50 | -0.2564 |
| 2913: | 45 | 171 | 45 | 45 | - | 46 | 170 | 46 | 46 | 704.32388 | -1.50 | 0.9796  |
| 2914: | 44 | 171 | 44 | 44 | - | 45 | 170 | 45 | 45 | 705.03449 | -0.50 | 0.0282  |
| 2915: | 43 | 171 | 43 | 43 | - | 44 | 170 | 44 | 44 | 705.74307 | -0.50 | -0.3261 |
| 2916: | 42 | 171 | 42 | 42 | - | 43 | 170 | 43 | 43 | 706.44908 | -0.50 | -0.6191 |
| 2917: | 40 | 171 | 40 | 40 | - | 41 | 170 | 41 | 41 | 707.85485 | -0.50 | 0.4563  |
| 2918: | 39 | 171 | 39 | 39 | - | 40 | 170 | 40 | 40 | 708.55297 | -0.50 | 0.1933  |
| 2919: | 38 | 171 | 38 | 38 | - | 39 | 170 | 39 | 39 | 709.24841 | -0.50 | -0.1009 |
| 2920: | 37 | 171 | 37 | 37 | - | 38 | 170 | 38 | 38 | 709.93957 | -1.50 | -2.0221 |
| 2921: | 35 | 171 | 35 | 35 | - | 36 | 170 | 36 | 36 | 711.31949 | -0.50 | -0.2879 |
| 2922: | 34 | 171 | 34 | 34 | - | 35 | 170 | 35 | 35 | 712.00447 | -0.50 | -0.4038 |
| 2923: | 32 | 171 | 32 | 32 | - | 33 | 170 | 33 | 33 | 713.36716 | -0.50 | 0.1103  |
| 2924: | 31 | 171 | 31 | 31 | - | 32 | 170 | 32 | 32 | 714.04394 | -0.50 | -0.1810 |
| 2925: | 30 | 171 | 30 | 30 | - | 31 | 170 | 31 | 31 | 714.72035 | -1.50 | 1.8413  |
| 2926: | 29 | 171 | 29 | 29 | - | 30 | 170 | 30 | 30 | 715.39023 | -0.50 | 0.0217  |
| 2927: | 28 | 171 | 28 | 28 | - | 29 | 170 | 29 | 29 | 716.05885 | -0.50 | -0.3655 |
| 2928: | 27 | 171 | 27 | 27 | - | 28 | 170 | 28 | 28 | 716.72465 | -0.50 | -0.8760 |
| 2929: | 26 | 171 | 26 | 26 | - | 27 | 170 | 27 | 27 | 717.39015 | -1.50 | 1.0148  |
| 2930: | 24 | 171 | 24 | 24 | - | 25 | 170 | 25 | 25 | 718.70773 | -0.50 | -0.5024 |
| 2931: | 23 | 171 | 23 | 23 | - | 24 | 170 | 24 | 24 | 719.36362 | -0.50 | -0.0916 |
| 2932: | 22 | 171 | 22 | 22 | - | 23 | 170 | 23 | 23 | 720.01655 | -0.50 | 0.0781  |
| 2933: | 20 | 171 | 20 | 20 | - | 21 | 170 | 21 | 21 | 721.31394 | -0.50 | 0.1216  |
| 2934: | 19 | 171 | 19 | 19 | - | 20 | 170 | 20 | 20 | 721.95872 | -0.50 | 0.3244  |
| 2935: | 17 | 171 | 17 | 17 | - | 18 | 170 | 18 | 18 | 723.23933 | -0.50 | -0.0060 |
| 2936: | 16 | 171 | 16 | 16 | - | 17 | 170 | 17 | 17 | 723.87430 | -1.50 | -1.3903 |
| 2937: | 15 | 171 | 15 | 15 | - | 16 | 170 | 16 | 16 | 724.50960 | -0.50 | 0.3054  |
| 2938: | 14 | 171 | 14 | 14 | - | 15 | 170 | 15 | 15 | 725.14036 | -0.50 | 0.2154  |
| 2939: | 12 | 171 | 12 | 12 | - | 13 | 170 | 13 | 13 | 726.39282 | -1.00 | -0.7438 |
| 2940: | 11 | 171 | 11 | 11 | - | 12 | 170 | 12 | 12 | 727.01629 | -0.50 | 0.1659  |
| 2941: | 10 | 171 | 10 | 10 | - | 11 | 170 | 11 | 11 | 727.63612 | -0.50 | 0.2079  |
| 2942: | 9  | 171 | 9  | 9  | - | 10 | 170 | 10 | 10 | 728.25270 | -0.50 | -0.2235 |
| 2943: | 8  | 171 | 8  | 8  | - | 9  | 170 | 9  | 9  | 728.86785 | -0.50 | 0.6962  |
| 2944: | 7  | 171 | 7  | 7  | - | 8  | 170 | 8  | 8  | 729.47873 | -0.50 | 0.1316  |
| 2945: | 4  | 171 | 4  | 4  | - | 5  | 170 | 5  | 5  | 731.29705 | -1.00 | 0.8764  |
| 2946: | 5  | 171 | 5  | 5  | - | 4  | 170 | 4  | 4  | 737.17245 | -0.50 | 0.6108  |
| 2947: | 10 | 171 | 10 | 10 | - | 9  | 170 | 9  | 9  | 740.00308 | -0.50 | -0.0440 |
| 2948: | 14 | 171 | 14 | 14 | - | 13 | 170 | 13 | 13 | 742.21679 | -0.50 | 0.2998  |
| 2949: | 15 | 171 | 15 | 15 | - | 14 | 170 | 14 | 14 | 742.76269 | -0.50 | 0.0715  |
| 2950: | 17 | 171 | 17 | 17 | - | 16 | 170 | 16 | 16 | 743.84625 | -0.50 | 0.0631  |
| 2951: | 18 | 171 | 18 | 18 | - | 17 | 170 | 17 | 17 | 744.38434 | -0.50 | 0.7221  |
| 2952: | 19 | 171 | 19 | 19 | - | 18 | 170 | 18 | 18 | 744.91891 | -0.50 | 0.7693  |
| 2953: | 20 | 171 | 20 | 20 | - | 19 | 170 | 19 | 19 | 745.45018 | -0.50 | 0.4294  |
| 2954: | 21 | 171 | 21 | 21 | - | 20 | 170 | 20 | 20 | 745.97818 | -0.50 | -0.2629 |
| 2955: | 22 | 171 | 22 | 22 | - | 21 | 170 | 21 | 21 | 746.50344 | -1.00 | -0.7732 |
| 2956: | 23 | 171 | 23 | 23 | - | 22 | 170 | 22 | 22 | 747.02800 | -1.00 | 0.9432  |
| 2957: | 24 | 171 | 24 | 24 | - | 23 | 170 | 23 | 23 | 747.54689 | -0.50 | -0.0791 |
| 2958: | 25 | 171 | 25 | 25 | - | 24 | 170 | 24 | 24 | 748.06358 | -0.50 | -0.3654 |

|       |    |     |    |    |   |    |     |    |    |           |       |         |
|-------|----|-----|----|----|---|----|-----|----|----|-----------|-------|---------|
| 2959: | 26 | 171 | 26 | 26 | - | 25 | 170 | 25 | 25 | 748.57721 | -1.00 | -0.7712 |
| 2960: | 27 | 171 | 27 | 27 | - | 26 | 170 | 26 | 26 | 749.08903 | -0.50 | -0.0417 |
| 2961: | 28 | 171 | 28 | 28 | - | 27 | 170 | 27 | 27 | 749.59591 | -1.50 | -1.3023 |
| 2962: | 29 | 171 | 29 | 29 | - | 28 | 170 | 28 | 28 | 750.10268 | -0.50 | 0.2815  |
| 2963: | 30 | 171 | 30 | 30 | - | 29 | 170 | 29 | 29 | 750.60428 | -0.50 | -0.3455 |
| 2964: | 31 | 171 | 31 | 31 | - | 30 | 170 | 30 | 30 | 751.10436 | -0.50 | 0.4712  |
| 2965: | 32 | 171 | 32 | 32 | - | 31 | 170 | 31 | 31 | 751.60039 | -0.50 | 0.2064  |
| 2966: | 33 | 171 | 33 | 33 | - | 32 | 170 | 32 | 32 | 752.09321 | -0.50 | -0.2952 |
| 2967: | 34 | 171 | 34 | 34 | - | 33 | 170 | 33 | 33 | 752.58340 | -0.50 | -0.4491 |
| 2968: | 35 | 171 | 35 | 35 | - | 34 | 170 | 34 | 34 | 753.07174 | -0.50 | 0.5294  |
| 2969: | 36 | 171 | 36 | 36 | - | 35 | 170 | 35 | 35 | 753.55564 | -0.50 | 0.0551  |
| 2970: | 37 | 171 | 37 | 37 | - | 36 | 170 | 36 | 36 | 754.03725 | -0.50 | 0.2826  |
| 2971: | 38 | 171 | 38 | 38 | - | 37 | 170 | 37 | 37 | 754.51522 | -0.50 | -0.1335 |
| 2972: | 40 | 171 | 40 | 40 | - | 39 | 170 | 39 | 39 | 755.46344 | -0.50 | 0.3227  |
| 2973: | 41 | 171 | 41 | 41 | - | 40 | 170 | 40 | 40 | 755.93269 | -0.50 | 0.2042  |
| 2974: | 42 | 171 | 42 | 42 | - | 41 | 170 | 41 | 41 | 756.39907 | -0.50 | 0.2310  |
| 2975: | 43 | 171 | 43 | 43 | - | 42 | 170 | 42 | 42 | 756.86211 | -0.50 | -0.0622 |
| 2976: | 44 | 171 | 44 | 44 | - | 43 | 170 | 43 | 43 | 757.32212 | -0.50 | -0.3607 |
| 2977: | 45 | 171 | 45 | 45 | - | 44 | 170 | 44 | 44 | 757.77924 | -0.50 | -0.5199 |
| 2978: | 46 | 171 | 46 | 46 | - | 45 | 170 | 45 | 45 | 758.23310 | -0.50 | -0.9049 |
| 2979: | 47 | 171 | 47 | 47 | - | 46 | 170 | 46 | 46 | 758.68536 | -0.50 | 0.1489  |
| 2980: | 48 | 171 | 48 | 48 | - | 47 | 170 | 47 | 47 | 759.13343 | -0.50 | 0.0563  |
| 2981: | 49 | 171 | 49 | 49 | - | 48 | 170 | 48 | 48 | 759.57844 | -0.50 | -0.0480 |
| 2982: | 50 | 171 | 50 | 50 | - | 49 | 170 | 49 | 49 | 760.02056 | -0.50 | 0.0108  |
| 2983: | 52 | 171 | 52 | 52 | - | 51 | 170 | 51 | 51 | 760.89606 | -0.50 | 0.5664  |
| 2984: | 53 | 171 | 53 | 53 | - | 52 | 170 | 52 | 52 | 761.32909 | -1.00 | 0.7228  |
| 2985: | 55 | 171 | 55 | 55 | - | 54 | 170 | 54 | 54 | 762.18491 | -0.50 | 0.0165  |
| 2986: | 56 | 171 | 56 | 56 | - | 55 | 170 | 55 | 55 | 762.60930 | -1.00 | 0.7634  |
| 2987: | 57 | 171 | 57 | 57 | - | 56 | 170 | 56 | 56 | 763.02935 | -0.50 | 0.2566  |
| 2988: | 58 | 171 | 58 | 58 | - | 57 | 170 | 57 | 57 | 763.44697 | -0.50 | 0.4110  |
| 2989: | 59 | 171 | 59 | 59 | - | 58 | 170 | 58 | 58 | 763.86045 | -0.50 | -0.4787 |
| 2990: | 62 | 171 | 62 | 62 | - | 61 | 170 | 61 | 61 | 765.08574 | -0.50 | 0.3257  |
| 2991: | 63 | 171 | 63 | 63 | - | 62 | 170 | 62 | 62 | 765.48722 | -0.50 | -0.1323 |
| 2992: | 64 | 171 | 64 | 64 | - | 63 | 170 | 63 | 63 | 765.88612 | -0.50 | -0.0505 |
| 2993: | 65 | 171 | 65 | 65 | - | 64 | 170 | 64 | 64 | 766.28147 | -0.50 | -0.3938 |
| 2994: | 66 | 171 | 66 | 66 | - | 65 | 170 | 65 | 65 | 766.67469 | -0.50 | 0.2624  |
| 2995: | 67 | 171 | 67 | 67 | - | 66 | 170 | 66 | 66 | 767.06551 | -2.00 | 1.6529  |
| 2996: | 69 | 171 | 69 | 69 | - | 68 | 170 | 68 | 68 | 767.83348 | -0.50 | 0.1866  |
| 2997: | 70 | 171 | 70 | 70 | - | 69 | 170 | 69 | 69 | 768.21568 | -2.00 | 2.3894  |
| 2998: | 71 | 171 | 71 | 71 | - | 70 | 170 | 70 | 70 | 768.59021 | -0.50 | 0.0758  |
| 2999: | 73 | 171 | 73 | 73 | - | 72 | 170 | 72 | 72 | 769.33461 | -0.50 | 0.2695  |
| 3000: | 76 | 171 | 76 | 76 | - | 75 | 170 | 75 | 75 | 770.42749 | -0.50 | 0.6145  |
| 3001: | 77 | 171 | 77 | 77 | - | 76 | 170 | 76 | 76 | 770.78530 | -0.50 | 0.6055  |
| 3002: | 79 | 171 | 79 | 79 | - | 78 | 170 | 78 | 78 | 771.48926 | -1.50 | -1.5040 |
| 3003: | 80 | 171 | 80 | 80 | - | 79 | 170 | 79 | 79 | 771.84062 | -1.50 | 1.6152  |
| 3004: | 82 | 171 | 82 | 82 | - | 81 | 170 | 81 | 81 | 772.52507 | -1.50 | -0.8040 |
| 3005: | 83 | 171 | 83 | 83 | - | 82 | 170 | 82 | 82 | 772.86487 | -0.50 | 0.3774  |
| 3006: | 87 | 172 | 87 | 87 | - | 88 | 171 | 88 | 88 | 667.34825 | -1.50 | 0.5233  |
| 3007: | 85 | 172 | 85 | 85 | - | 86 | 171 | 86 | 86 | 668.97478 | -1.50 | -0.9963 |
| 3008: | 83 | 172 | 83 | 83 | - | 84 | 171 | 84 | 84 | 670.59306 | -1.50 | -0.9486 |
| 3009: | 82 | 172 | 82 | 82 | - | 83 | 171 | 83 | 83 | 671.40072 | -1.50 | 1.2870  |
| 3010: | 81 | 172 | 81 | 81 | - | 82 | 171 | 82 | 82 | 672.20208 | -1.50 | -0.3108 |
| 3011: | 80 | 172 | 80 | 80 | - | 81 | 171 | 81 | 81 | 673.00396 | -1.00 | 1.0822  |
| 3012: | 79 | 172 | 79 | 79 | - | 80 | 171 | 80 | 80 | 673.80168 | -0.50 | 0.7901  |
| 3013: | 78 | 172 | 78 | 78 | - | 79 | 171 | 79 | 79 | 674.59614 | -0.50 | -0.2829 |
| 3014: | 76 | 172 | 76 | 76 | - | 77 | 171 | 77 | 77 | 676.17862 | -1.50 | -1.4153 |
| 3015: | 75 | 172 | 75 | 75 | - | 76 | 171 | 76 | 76 | 676.96655 | -1.50 | -1.5564 |
| 3016: | 74 | 172 | 74 | 74 | - | 75 | 171 | 75 | 75 | 677.75403 | -0.50 | 0.3483  |
| 3017: | 70 | 172 | 70 | 70 | - | 71 | 171 | 71 | 71 | 680.87062 | -0.50 | -0.3233 |
| 3018: | 69 | 172 | 69 | 69 | - | 70 | 171 | 70 | 70 | 681.64295 | -1.00 | -1.0279 |
| 3019: | 67 | 172 | 67 | 67 | - | 68 | 171 | 68 | 68 | 683.18208 | -0.50 | -0.4005 |
| 3020: | 65 | 172 | 65 | 65 | - | 66 | 171 | 66 | 66 | 684.70989 | -1.50 | -0.9766 |
| 3021: | 63 | 172 | 63 | 63 | - | 64 | 171 | 64 | 64 | 686.22877 | -0.50 | -0.3325 |
| 3022: | 62 | 172 | 62 | 62 | - | 63 | 171 | 63 | 63 | 686.98446 | -0.50 | 0.0565  |
| 3023: | 61 | 172 | 61 | 61 | - | 62 | 171 | 62 | 62 | 687.73702 | -0.50 | -0.1343 |
| 3024: | 59 | 172 | 59 | 59 | - | 60 | 171 | 60 | 60 | 689.23463 | -0.50 | -0.3583 |
| 3025: | 58 | 172 | 58 | 58 | - | 59 | 171 | 59 | 59 | 689.98030 | -0.50 | 0.2370  |
| 3026: | 57 | 172 | 57 | 57 | - | 58 | 171 | 58 | 58 | 690.72182 | -1.00 | -0.7505 |
| 3027: | 56 | 172 | 56 | 56 | - | 57 | 171 | 57 | 57 | 691.46239 | -0.50 | -0.1165 |
| 3028: | 55 | 172 | 55 | 55 | - | 56 | 171 | 56 | 56 | 692.20016 | -1.50 | 0.2932  |
| 3029: | 54 | 172 | 54 | 54 | - | 55 | 171 | 55 | 55 | 692.93497 | -0.50 | 0.3229  |

|       |    |     |    |    |   |    |     |    |    |           |       |         |
|-------|----|-----|----|----|---|----|-----|----|----|-----------|-------|---------|
| 3030: | 52 | 172 | 52 | 52 | - | 53 | 171 | 53 | 53 | 694.39624 | -0.50 | -0.2107 |
| 3031: | 51 | 172 | 51 | 51 | - | 52 | 171 | 52 | 52 | 695.12354 | -0.50 | 0.0746  |
| 3032: | 50 | 172 | 50 | 50 | - | 51 | 171 | 51 | 51 | 695.84900 | -1.00 | 1.1170  |
| 3033: | 48 | 172 | 48 | 48 | - | 49 | 171 | 49 | 49 | 697.28914 | -0.50 | 0.2302  |
| 3034: | 46 | 172 | 46 | 46 | - | 47 | 171 | 47 | 47 | 698.71883 | -1.00 | -0.6666 |
| 3035: | 45 | 172 | 45 | 45 | - | 46 | 171 | 46 | 46 | 699.43080 | -0.50 | -0.0642 |
| 3036: | 44 | 172 | 44 | 44 | - | 45 | 171 | 45 | 45 | 700.13972 | -0.50 | 0.1110  |
| 3037: | 43 | 172 | 43 | 43 | - | 44 | 171 | 44 | 44 | 700.84560 | -0.50 | -0.1265 |
| 3038: | 40 | 172 | 40 | 40 | - | 41 | 171 | 41 | 41 | 702.94630 | -2.00 | -1.9723 |
| 3039: | 39 | 172 | 39 | 39 | - | 40 | 171 | 40 | 40 | 703.64390 | -0.50 | 0.0625  |
| 3040: | 38 | 172 | 38 | 38 | - | 39 | 171 | 39 | 39 | 704.33863 | -2.00 | 1.8761  |
| 3041: | 37 | 172 | 37 | 37 | - | 38 | 171 | 38 | 38 | 705.02605 | -2.00 | -0.9669 |
| 3042: | 36 | 172 | 36 | 36 | - | 37 | 171 | 37 | 37 | 705.71383 | -1.00 | -0.7924 |
| 3043: | 35 | 172 | 35 | 35 | - | 36 | 171 | 36 | 36 | 706.39817 | -2.00 | -1.3959 |
| 3044: | 34 | 172 | 34 | 34 | - | 35 | 171 | 35 | 35 | 707.08000 | -2.00 | -1.8431 |
| 3045: | 33 | 172 | 33 | 33 | - | 34 | 171 | 34 | 34 | 707.76147 | -0.50 | 0.0204  |
| 3046: | 32 | 172 | 32 | 32 | - | 33 | 171 | 33 | 33 | 708.43753 | -1.00 | -0.8510 |
| 3047: | 31 | 172 | 31 | 31 | - | 32 | 171 | 32 | 32 | 709.11259 | -0.50 | -0.0429 |
| 3048: | 30 | 172 | 30 | 30 | - | 31 | 171 | 31 | 31 | 709.78424 | -0.50 | 0.0390  |
| 3049: | 29 | 172 | 29 | 29 | - | 30 | 171 | 30 | 30 | 710.45320 | -0.50 | 0.1191  |
| 3050: | 28 | 172 | 28 | 28 | - | 29 | 171 | 29 | 29 | 711.12021 | -1.00 | 0.9418  |
| 3051: | 27 | 172 | 27 | 27 | - | 28 | 171 | 28 | 28 | 711.78484 | -2.50 | 2.0815  |
| 3052: | 25 | 172 | 25 | 25 | - | 26 | 171 | 26 | 26 | 713.09969 | -2.50 | -1.9405 |
| 3053: | 24 | 172 | 24 | 24 | - | 25 | 171 | 25 | 25 | 713.75563 | -2.00 | -1.3734 |
| 3054: | 23 | 172 | 23 | 23 | - | 24 | 171 | 24 | 24 | 714.41022 | -0.50 | 0.5583  |
| 3055: | 22 | 172 | 22 | 22 | - | 23 | 171 | 23 | 23 | 715.06030 | -1.00 | 0.6991  |
| 3056: | 21 | 172 | 21 | 21 | - | 22 | 171 | 22 | 22 | 715.70743 | -1.00 | 0.6133  |
| 3057: | 17 | 172 | 17 | 17 | - | 18 | 171 | 18 | 18 | 718.26857 | -0.50 | 0.2136  |
| 3058: | 16 | 172 | 16 | 16 | - | 17 | 171 | 17 | 17 | 718.90363 | -2.00 | 1.7417  |
| 3059: | 15 | 172 | 15 | 15 | - | 16 | 171 | 16 | 16 | 719.53120 | -2.00 | -1.4702 |
| 3060: | 14 | 172 | 14 | 14 | - | 15 | 171 | 15 | 15 | 720.16039 | -0.50 | -0.3075 |
| 3061: | 13 | 172 | 13 | 13 | - | 14 | 171 | 14 | 14 | 720.78664 | -1.00 | 0.6742  |
| 3062: | 12 | 172 | 12 | 12 | - | 13 | 171 | 13 | 13 | 721.40819 | -0.50 | -0.2806 |
| 3063: | 10 | 172 | 10 | 10 | - | 11 | 171 | 11 | 11 | 722.64539 | -0.50 | 0.2181  |
| 3064: | 10 | 172 | 10 | 10 | - | 9  | 171 | 9  | 9  | 734.95419 | -2.50 | 1.1572  |
| 3065: | 13 | 172 | 13 | 13 | - | 12 | 171 | 12 | 12 | 736.60924 | -1.50 | 0.3479  |
| 3066: | 14 | 172 | 14 | 14 | - | 13 | 171 | 13 | 13 | 737.15541 | -0.50 | 0.3299  |
| 3067: | 17 | 172 | 17 | 17 | - | 16 | 171 | 16 | 16 | 738.77555 | -0.50 | -0.7341 |
| 3068: | 18 | 172 | 18 | 18 | - | 17 | 171 | 17 | 17 | 739.31041 | -0.50 | -0.4735 |
| 3069: | 19 | 172 | 19 | 19 | - | 18 | 171 | 18 | 18 | 739.84234 | -0.50 | -0.2343 |
| 3070: | 20 | 172 | 20 | 20 | - | 19 | 171 | 19 | 19 | 740.37128 | -0.50 | -0.0718 |
| 3071: | 22 | 172 | 22 | 22 | - | 21 | 171 | 21 | 21 | 741.41933 | -1.00 | -0.8188 |
| 3072: | 23 | 172 | 23 | 23 | - | 22 | 171 | 22 | 22 | 741.94034 | -0.50 | 0.1811  |
| 3073: | 24 | 172 | 24 | 24 | - | 23 | 171 | 23 | 23 | 742.45734 | -0.50 | 0.1027  |
| 3074: | 25 | 172 | 25 | 25 | - | 24 | 171 | 24 | 24 | 742.97077 | -0.50 | -0.6093 |
| 3075: | 26 | 172 | 26 | 26 | - | 25 | 171 | 25 | 25 | 743.48448 | -2.50 | 1.8997  |
| 3076: | 28 | 172 | 28 | 28 | - | 27 | 171 | 27 | 27 | 744.49840 | -2.50 | 2.2592  |
| 3077: | 30 | 172 | 30 | 30 | - | 29 | 171 | 29 | 29 | 745.49855 | -0.50 | 0.6685  |
| 3078: | 31 | 172 | 31 | 31 | - | 30 | 171 | 30 | 30 | 745.99416 | -0.50 | -0.1478 |
| 3079: | 32 | 172 | 32 | 32 | - | 31 | 171 | 31 | 31 | 746.48844 | -0.50 | 0.6748  |
| 3080: | 33 | 172 | 33 | 33 | - | 32 | 171 | 32 | 32 | 746.97741 | -0.50 | -0.8389 |
| 3081: | 36 | 172 | 36 | 36 | - | 35 | 171 | 35 | 35 | 748.43147 | -0.50 | -0.3419 |
| 3082: | 39 | 172 | 39 | 39 | - | 38 | 171 | 38 | 38 | 749.85795 | -0.50 | -0.4940 |
| 3083: | 41 | 172 | 41 | 41 | - | 40 | 171 | 40 | 40 | 750.79455 | -0.50 | 0.0423  |
| 3084: | 43 | 172 | 43 | 43 | - | 42 | 171 | 42 | 42 | 751.71922 | -0.50 | 0.7119  |
| 3085: | 44 | 172 | 44 | 44 | - | 43 | 171 | 43 | 43 | 752.17596 | -0.50 | -0.0127 |
| 3086: | 45 | 172 | 45 | 45 | - | 44 | 171 | 44 | 44 | 752.62929 | -1.50 | -1.1173 |
| 3087: | 46 | 172 | 46 | 46 | - | 45 | 171 | 45 | 45 | 753.08145 | -0.50 | -0.3572 |
| 3088: | 47 | 172 | 47 | 47 | - | 46 | 171 | 46 | 46 | 753.53000 | -0.50 | -0.1676 |
| 3089: | 48 | 172 | 48 | 48 | - | 47 | 171 | 47 | 47 | 753.97571 | -0.50 | 0.2262  |
| 3090: | 49 | 172 | 49 | 49 | - | 48 | 171 | 48 | 48 | 754.41729 | -1.00 | -0.4610 |
| 3091: | 50 | 172 | 50 | 50 | - | 49 | 171 | 49 | 49 | 754.85475 | -2.50 | -2.2144 |
| 3092: | 51 | 172 | 51 | 51 | - | 50 | 171 | 50 | 50 | 755.29345 | -0.50 | 0.3306  |
| 3093: | 52 | 172 | 52 | 52 | - | 51 | 171 | 51 | 51 | 755.72658 | -0.50 | 0.3689  |
| 3094: | 54 | 172 | 54 | 54 | - | 53 | 171 | 53 | 53 | 756.58333 | -0.50 | 0.1442  |
| 3095: | 56 | 172 | 56 | 56 | - | 55 | 171 | 55 | 55 | 757.42692 | -1.00 | -0.9301 |
| 3096: | 57 | 172 | 57 | 57 | - | 56 | 171 | 56 | 56 | 757.84534 | -0.50 | -0.2140 |
| 3097: | 58 | 172 | 58 | 58 | - | 57 | 171 | 57 | 57 | 758.26041 | -0.50 | 0.2440  |
| 3098: | 59 | 172 | 59 | 59 | - | 58 | 171 | 58 | 58 | 758.67080 | -1.00 | -0.8812 |
| 3099: | 60 | 172 | 60 | 60 | - | 59 | 171 | 59 | 59 | 759.08021 | -0.50 | 0.1151  |
| 3100: | 62 | 172 | 62 | 62 | - | 61 | 171 | 61 | 61 | 759.88748 | -0.50 | -0.1184 |

|       |    |     |    |    |   |    |     |    |    |           |       |         |
|-------|----|-----|----|----|---|----|-----|----|----|-----------|-------|---------|
| 3101: | 65 | 172 | 65 | 65 | - | 64 | 171 | 64 | 64 | 761.07589 | -0.50 | 0.4183  |
| 3102: | 66 | 172 | 66 | 66 | - | 65 | 171 | 65 | 65 | 761.46578 | -1.00 | 0.6050  |
| 3103: | 67 | 172 | 67 | 67 | - | 66 | 171 | 66 | 66 | 761.85170 | -0.50 | -0.0429 |
| 3104: | 68 | 172 | 68 | 68 | - | 67 | 171 | 67 | 67 | 762.23487 | -0.50 | -0.3007 |
| 3105: | 78 | 173 | 78 | 78 | - | 79 | 172 | 79 | 79 | 669.80446 | -2.00 | 1.8974  |
| 3106: | 77 | 173 | 77 | 77 | - | 78 | 172 | 78 | 78 | 670.59306 | -0.50 | 0.2481  |
| 3107: | 73 | 173 | 73 | 73 | - | 74 | 172 | 74 | 74 | 673.73043 | -2.00 | 1.5404  |
| 3108: | 72 | 173 | 72 | 72 | - | 73 | 172 | 73 | 73 | 674.50781 | -2.00 | 1.1517  |
| 3109: | 71 | 173 | 71 | 71 | - | 72 | 172 | 72 | 72 | 675.28106 | -2.00 | -0.8585 |
| 3110: | 69 | 173 | 69 | 69 | - | 70 | 172 | 70 | 70 | 676.82469 | -2.00 | -0.2063 |
| 3111: | 60 | 173 | 60 | 60 | - | 61 | 172 | 61 | 61 | 683.64368 | -0.50 | 0.6656  |
| 3112: | 59 | 173 | 59 | 59 | - | 60 | 172 | 60 | 60 | 684.38867 | -0.50 | 0.8259  |
| 3113: | 58 | 173 | 58 | 58 | - | 59 | 172 | 59 | 59 | 685.13016 | -0.50 | 0.0495  |
| 3114: | 54 | 173 | 54 | 54 | - | 55 | 172 | 55 | 55 | 688.07414 | -0.50 | 0.6822  |
| 3115: | 53 | 173 | 53 | 53 | - | 54 | 172 | 54 | 54 | 688.80203 | -2.00 | -0.8138 |
| 3116: | 52 | 173 | 52 | 52 | - | 53 | 172 | 53 | 53 | 689.53123 | -2.00 | 1.5890  |
| 3117: | 51 | 173 | 51 | 51 | - | 52 | 172 | 52 | 52 | 690.25259 | -2.00 | -1.2550 |
| 3118: | 50 | 173 | 50 | 50 | - | 51 | 172 | 51 | 51 | 690.97430 | -2.00 | -1.1515 |
| 3119: | 49 | 173 | 49 | 49 | - | 50 | 172 | 50 | 50 | 691.69525 | -0.50 | 0.7936  |
| 3120: | 46 | 173 | 46 | 46 | - | 47 | 172 | 47 | 47 | 693.83682 | -0.50 | 1.0023  |
| 3121: | 45 | 173 | 45 | 45 | - | 46 | 172 | 46 | 46 | 694.54434 | -0.50 | -0.0328 |
| 3122: | 44 | 173 | 44 | 44 | - | 45 | 172 | 45 | 45 | 695.25051 | -0.50 | 0.2054  |
| 3123: | 43 | 173 | 43 | 43 | - | 44 | 172 | 44 | 44 | 695.95369 | -0.50 | 0.0812  |
| 3124: | 41 | 173 | 41 | 41 | - | 42 | 172 | 42 | 42 | 697.35121 | -2.00 | -1.1074 |
| 3125: | 39 | 173 | 39 | 39 | - | 40 | 172 | 40 | 40 | 698.74085 | -0.50 | 0.3861  |
| 3126: | 38 | 173 | 38 | 38 | - | 39 | 172 | 39 | 39 | 699.43080 | -0.50 | 0.2345  |
| 3127: | 37 | 173 | 37 | 37 | - | 38 | 172 | 38 | 38 | 700.11835 | -0.50 | 0.3364  |
| 3128: | 35 | 173 | 35 | 35 | - | 36 | 172 | 36 | 36 | 701.48586 | -1.50 | 0.9283  |
| 3129: | 33 | 173 | 33 | 33 | - | 34 | 172 | 34 | 34 | 702.84077 | -0.50 | -0.4132 |
| 3130: | 32 | 173 | 32 | 32 | - | 33 | 172 | 33 | 33 | 703.51603 | -1.00 | 0.7318  |
| 3131: | 30 | 173 | 30 | 30 | - | 31 | 172 | 31 | 31 | 704.85477 | -0.50 | -0.7144 |
| 3132: | 29 | 173 | 29 | 29 | - | 30 | 172 | 30 | 30 | 705.52168 | -0.50 | 0.1330  |
| 3133: | 27 | 173 | 27 | 27 | - | 28 | 172 | 28 | 28 | 706.84563 | -0.50 | 0.0409  |
| 3134: | 26 | 173 | 26 | 26 | - | 27 | 172 | 27 | 27 | 707.50416 | -1.00 | 0.6001  |
| 3135: | 25 | 173 | 25 | 25 | - | 26 | 172 | 26 | 26 | 708.15862 | -0.50 | -0.2045 |
| 3136: | 22 | 173 | 22 | 22 | - | 23 | 172 | 23 | 23 | 710.10788 | -0.50 | -0.4578 |
| 3137: | 19 | 173 | 19 | 19 | - | 20 | 172 | 20 | 20 | 712.03252 | -0.50 | -0.8172 |
| 3138: | 12 | 173 | 12 | 12 | - | 13 | 172 | 13 | 13 | 716.42879 | -1.00 | -0.2083 |
| 3139: | 10 | 173 | 10 | 10 | - | 9  | 172 | 9  | 9  | 729.90814 | -0.50 | -0.4187 |
| 3140: | 16 | 173 | 16 | 16 | - | 15 | 172 | 15 | 15 | 733.17839 | -1.00 | 1.0728  |
| 3141: | 23 | 173 | 23 | 23 | - | 22 | 172 | 22 | 22 | 736.85894 | -0.50 | 0.0858  |
| 3142: | 26 | 173 | 26 | 26 | - | 25 | 172 | 25 | 25 | 738.39295 | -1.50 | 0.1850  |
| 3143: | 28 | 173 | 28 | 28 | - | 27 | 172 | 27 | 27 | 739.39995 | -0.50 | -0.6991 |
| 3144: | 29 | 173 | 29 | 29 | - | 28 | 172 | 28 | 28 | 739.89991 | -0.50 | -0.2503 |
| 3145: | 30 | 173 | 30 | 30 | - | 29 | 172 | 29 | 29 | 740.39725 | -0.50 | 0.5387  |
| 3146: | 32 | 173 | 32 | 32 | - | 31 | 172 | 31 | 31 | 741.37840 | -2.00 | -2.5142 |
| 3147: | 33 | 173 | 33 | 33 | - | 32 | 172 | 32 | 32 | 741.86733 | -2.00 | -1.2267 |
| 3148: | 34 | 173 | 34 | 34 | - | 33 | 172 | 33 | 33 | 742.35174 | -2.00 | -1.4804 |
| 3149: | 35 | 173 | 35 | 35 | - | 34 | 172 | 34 | 34 | 742.83562 | -0.50 | 0.7195  |
| 3150: | 37 | 173 | 37 | 37 | - | 36 | 172 | 36 | 36 | 743.78882 | -1.00 | -0.4713 |
| 3151: | 40 | 173 | 40 | 40 | - | 39 | 172 | 39 | 39 | 745.19838 | -1.00 | -0.0033 |
| 3152: | 41 | 173 | 41 | 41 | - | 40 | 172 | 40 | 40 | 745.66315 | -0.50 | 1.0866  |
| 3153: | 46 | 173 | 46 | 46 | - | 45 | 172 | 45 | 45 | 747.93445 | -2.00 | -0.6711 |
| 3154: | 49 | 173 | 49 | 49 | - | 48 | 172 | 48 | 48 | 749.26454 | -2.00 | 2.0290  |
| 3155: | 50 | 173 | 50 | 50 | - | 49 | 172 | 49 | 49 | 749.69822 | -1.00 | -0.6517 |
